# Supplementary material for: Synthesis,in vitroanti-plasmodial potency,in-silico-cum-SPR binding with inhibition ofPfPyridoxal synthase and rapid parasiticidal action by 3,5-bis{(E) arylidene}-N-methyl-4-piperidones
Source: Royal Society of Chemistry journal article supplement (doi:10.1039/d1nj04604g), 2021-01-01
Supplement: d1nj04604g1.pdf [file d1nj04604g1.pdf]

## *New Journal of Chemistry*

### Supplementary Information

#### **Synthesis, *in vitro* anti-plasmodial potency, *in silico* cum SPR binding with inhibition of PfPyridoxal synthase and rapid parasiticidal action by 3,5-Bis{(E) arylidene}-N-methyl-4-piperidones**

Siva Kumar Rokkam <sup>a§</sup>, Mamta Yadav <sup>b§</sup>, Mayank Joshi <sup>c</sup>, Angshuman Roy Choudhury <sup>c</sup>,

Dinkar Sahal <sup>b\*</sup>, Nageswara Rao Golakoti <sup>a\*</sup>

<sup>a</sup> Department of Chemistry, Sri Sathya Sai Institute of Higher Learning, Prasanthi Nilayam, Andhra Pradesh, India-515134

<sup>b</sup> Malaria Drug Discovery Lab, International Centre for Genetic Engineering and Biotechnology (ICGEB), New Delhi, India.

<sup>c</sup> Department of Chemical Sciences, Indian Institute of Science Education and Research (IISER), Mohali, Sector 81, S. A. S. Nagar, Manauli PO, Mohali, Punjab, 140306, India.

§ Both authors contributed equally

\* Corresponding authors

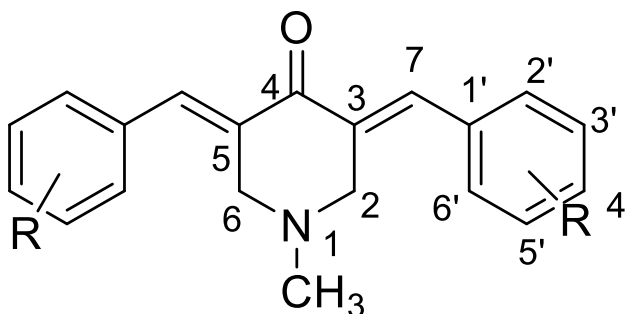

\* Corresponding author. Tel.: +91 9871980190; e-mail: dsahal@gmail.com

\* Corresponding author. Tel.: +91 9492595462; e-mail: gnageswararao@sssihl.edu.in

**Ia) 3,5-Bis (dibenzylidene)-N-methyl-4-piperidone:**

Yield: 88.9 %. Light yellow crystals. Recrystallized from pet ether and chloroform. mp: 111.5-113°C. <sup>1</sup>H NMR (400 MHz, CDCl<sub>3</sub>): δ 7.82 (H-7, 2H, s), δ 7.45 to 7.37 (Ar-H, m), δ 3.76 (H-2, H-6, 4H, s), δ 2.45, (N-CH<sub>3</sub>, 3H, s). <sup>13</sup>C NMR (400 MHz, CDCl<sub>3</sub>): δ 186.96 (C-4), δ 136.46 (C-5), δ 135.28 (C-7), δ 133.03(C-1'), δ 130.43 (C-4'), δ 129.03 (C-2' and 6'), δ 128.58 (C-3' and C-5'), δ 57.1 (C-6) and δ 45.89 (N-C); IR (KBr disc) (cm<sup>-1</sup>): 3014 (sp<sup>2</sup> C-H stretch), 2880 (sp<sup>3</sup> C-H stretch), 1670 (C=O stretch), 1618 (C=C stretch), 1588 and 1572(Ar skeletal bands), 764 and 693 (mono substituted aromatic ring); Mass: [M+H]<sup>+</sup> = m/z 290.2000; UV (MeOH) λ<sub>max</sub> (nm): 328 and 231.

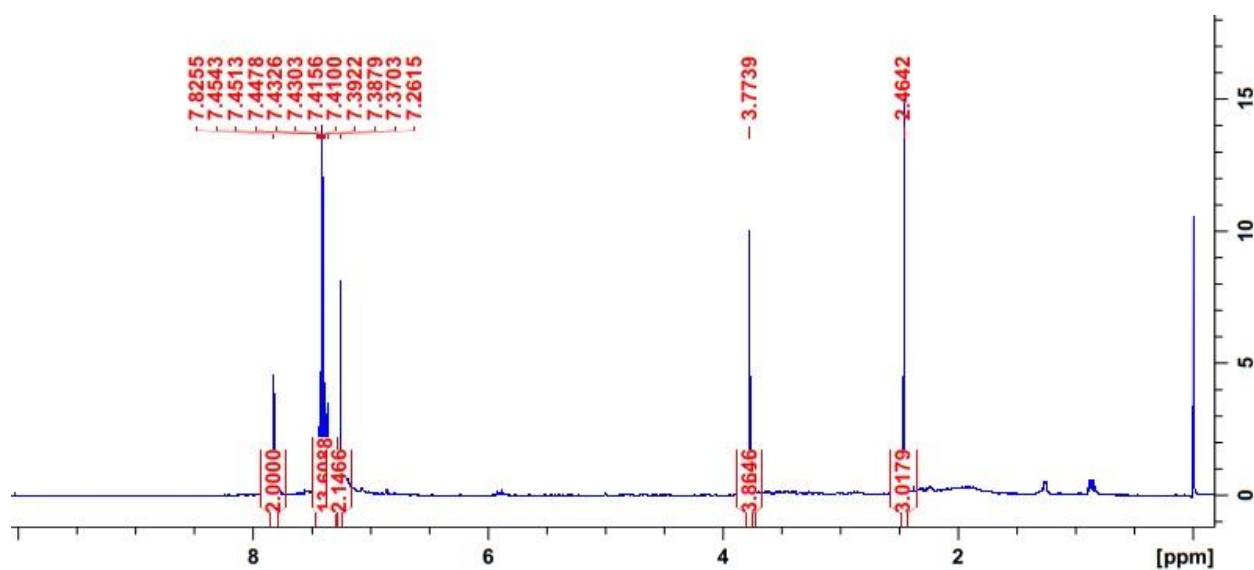

SI-Figure 1: <sup>1</sup>H NMR spectrum of 3,5-Bis (dibenzylidene)-N-methyl-4-piperidone.

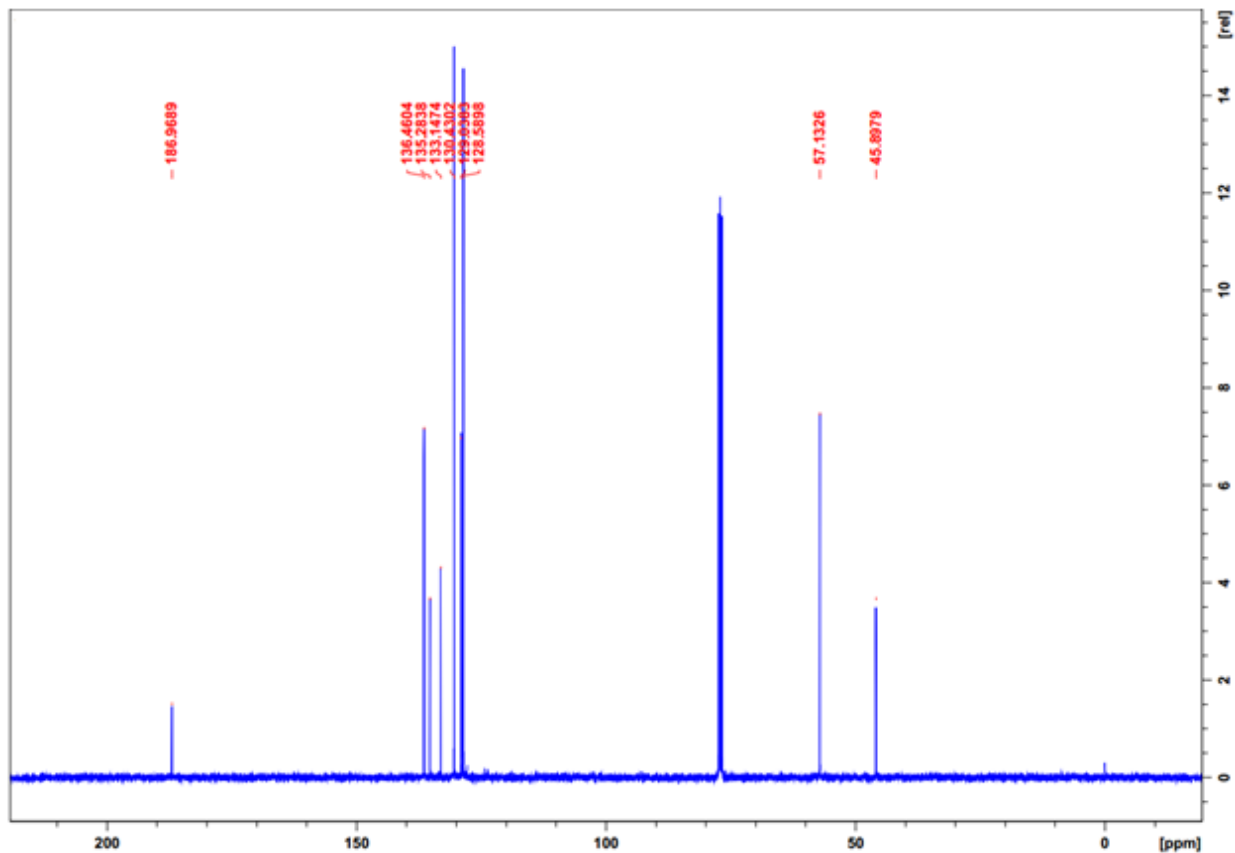

SI-Figure 2: <sup>13</sup>C NMR spectrum of 3,5-Bis (dibenzylidene)-N-methyl-4-piperidone.

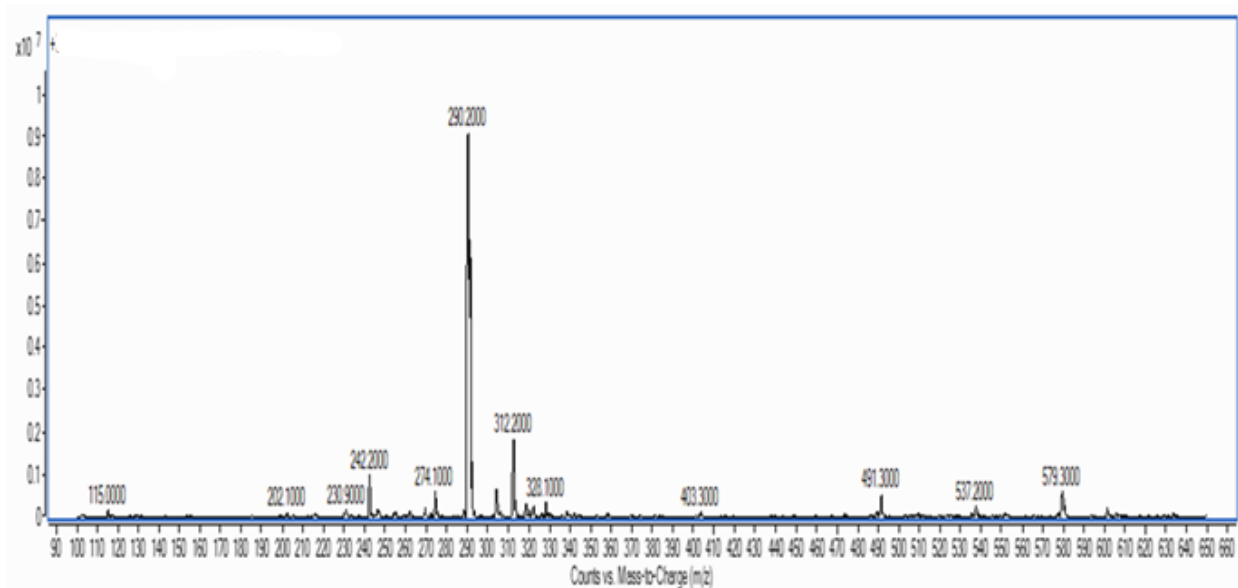

Mass:  $[M+H]^+ = m/z 290.2000$

SI-Figure 3: Mass spectrum of 3,5-Bis (dibenzylidene)-N-methyl-4-piperidone.

### Ib) 3,5-Bis ((E)-2-Chlorobenzylidene)-N-methyl-4-piperidone

Yield: 81.4%. Light yellow crystals. Recrystallized from chloroform-methanol. mp: 145-147.8°C.  $^1\text{H}$  NMR (400 MHz,  $\text{CDCl}_3$ ):  $\delta$  8.00 (H-7, 2H, s),  $\delta$  7.45 (H-2', 2H, overlapping signals),  $\delta$  7.31 (H-6', 2H, overlapping signals),  $\delta$  7.29 (H-5', 2H, overlapping signals),  $\delta$  7.24 (H-4', 2H, overlapping signals),  $\delta$  3.61 (H-2, H-6, 4H, s),  $\delta$  2.37, (N-CH<sub>3</sub>, 3H, s).  $^{13}\text{C}$  NMR (400 MHz,  $\text{CDCl}_3$ ):  $\delta$  186.15 (C-4),  $\delta$  135.16 (C-2'),  $\delta$  134.2 (C-5),  $\delta$  134.02 (C-7),  $\delta$  133.6 (C-1'),  $\delta$  130.33 (C-6'),  $\delta$  130.01 (C-4'),  $\delta$  129.94 (C-3'),  $\delta$  126.41 (C-5'),  $\delta$  56.67 (C-6) and  $\delta$  45.55 (N-C); IR (KBr disc) ( $\text{cm}^{-1}$ ): 3067 ( $\text{sp}^2$  C-H), 2977 ( $\text{sp}^3$  C-H), 1675 (C=O), 1623 (C=C), 1588 and 1572 (aromatic skeletal bands), 1053 (C-Cl); Mass:  $[\text{M}+\text{H}]^+ = m/z$  358.1000,  $[\text{M}+2]^+ = m/z$  360,  $[\text{M}+4]^+ = m/z$  362; UV (MeOH)  $\lambda_{\text{max}}$  (nm): 235 and 314 nm.

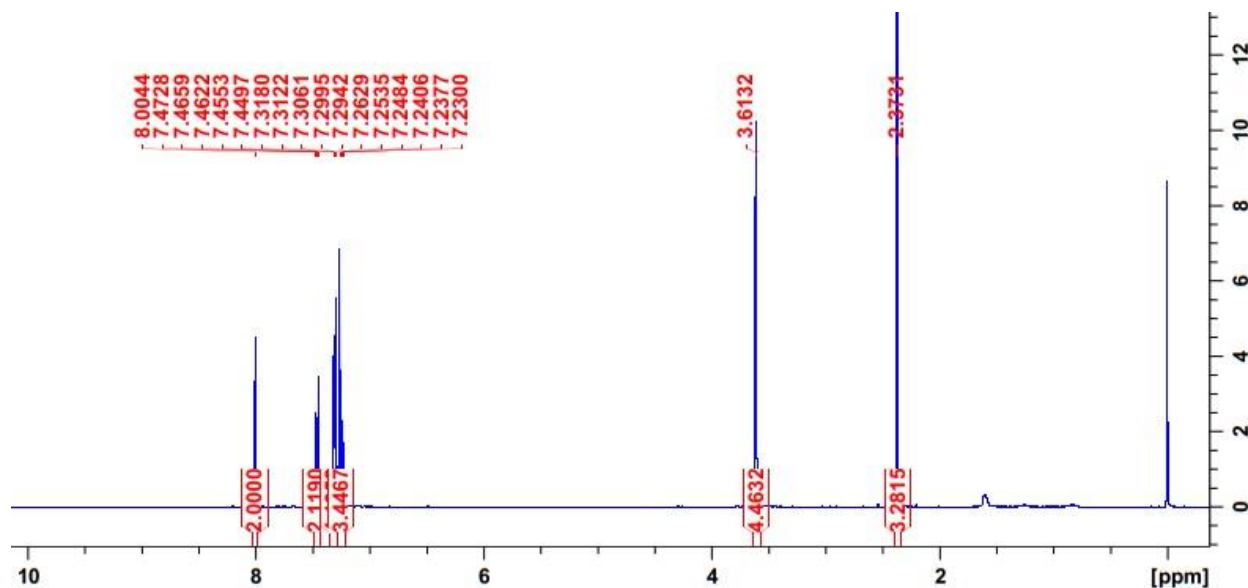

SI-Figure 4:  $^1\text{H}$  NMR spectrum of 3,5-Bis ((E)-2-Chlorobenzylidene)-N-methyl-4-piperidone.

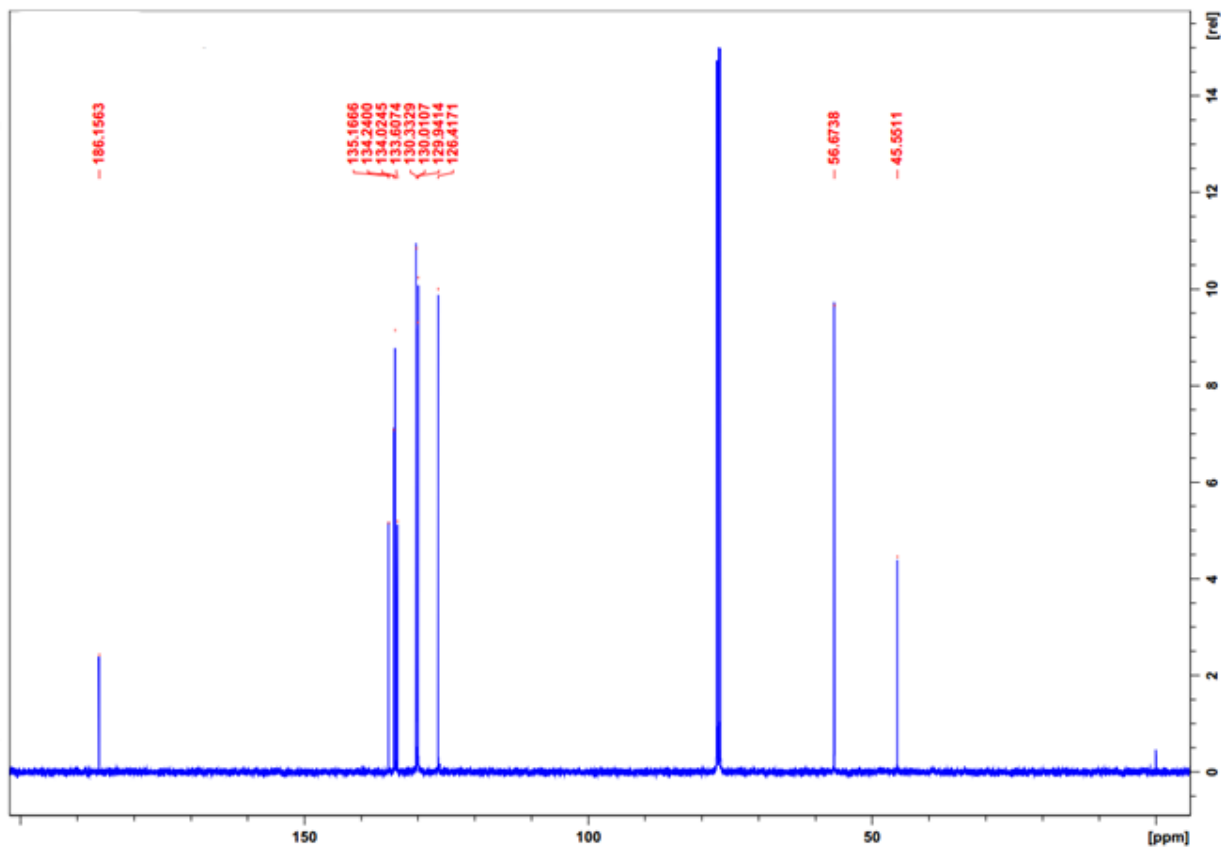

SI-Figure 5:  $^{13}\text{C}$  NMR spectrum of 3,5-Bis ((E)-2-Chlorobenzylidene)-N-methyl-4-piperidone.

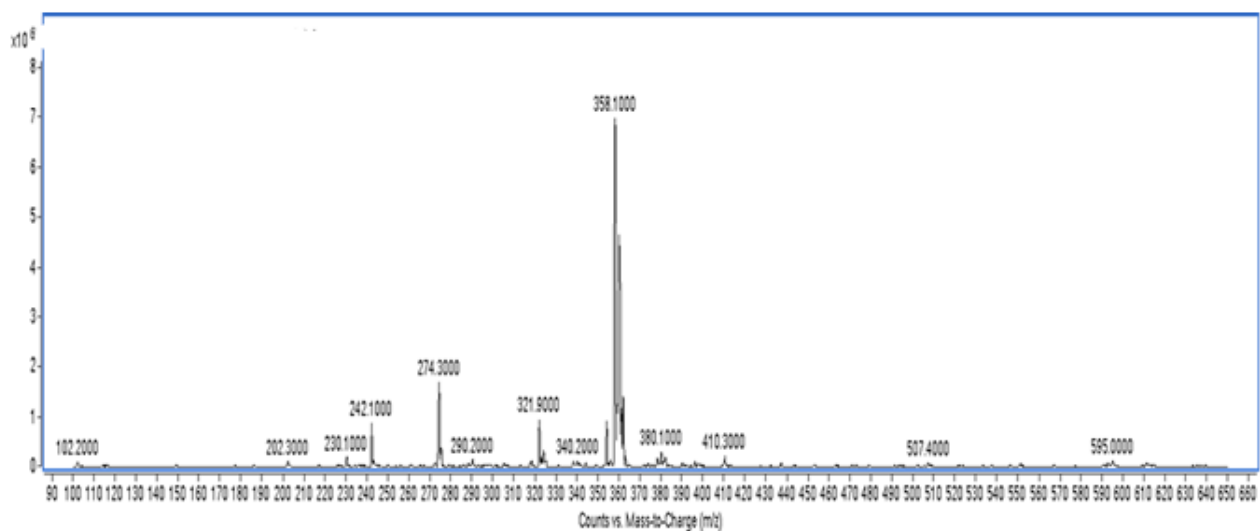

Mass:  $[\text{M}+\text{H}]^+ = m/z$  358.1000

SI-Figure 6: Mass spectrum of 3,5-Bis ((E)-2-Chlorobenzylidene)-N-methyl-4-piperidone.

### Ic) 3,5-Bis ((E)-3-Chlorobenzylidene)-N-methyl-4-piperidone

Yield: 78.6%. Yellow crystals. Recrystallized from chloroform-methanol. mp: 172.2-173.6°C;  $^1\text{H}$  NMR (400 MHz,  $\text{CDCl}_3$ ):  $\delta$  7.72 (H-7, 2H, s),  $\delta$  7.38 (H-2', H-4', 4H, overlapping signals),  $\delta$  7.35 (H-5', 2H, overlapping signals),  $\delta$  7.27 (H-6', 2H, overlapping signals),  $\delta$  3.73 (H-2, H-6, 4H, s),  $\delta$  2.47, (N-CH<sub>3</sub>, 3H, s).  $^{13}\text{C}$  NMR (400 MHz,  $\text{CDCl}_3$ ):  $\delta$  186.41 (C-4),  $\delta$  136.86 (C-3'),  $\delta$  134.99 (C-5),  $\delta$  134.51 (C-7),  $\delta$  133.99 (C-1'),  $\delta$  129.93 (C-5'),  $\delta$  129.83 (C-2'),  $\delta$  129.04 (C-4'),  $\delta$  128.43 (C-6')  $\delta$  56.81 (C-6) and  $\delta$  45.85 (N-C); IR (KBr disc) ( $\text{cm}^{-1}$ ): 3011 ( $\text{sp}^2$  CH), 2934 ( $\text{sp}^3$  C-H), 1669 (C=O), 1613 (C=C), 1588 and 1562 (aromatic skeletal stretch), 1096 (C-Cl), 782 (meta-substitution); Mass:  $[\text{M}+\text{H}]^+ = m/z$  358.1000,  $[\text{M}+2]^+ = m/z$  360,  $[\text{M}+4]^+ = m/z$  362; UV (MeOH)  $\lambda_{\text{max}}$  (nm): 233 and 322 nm.

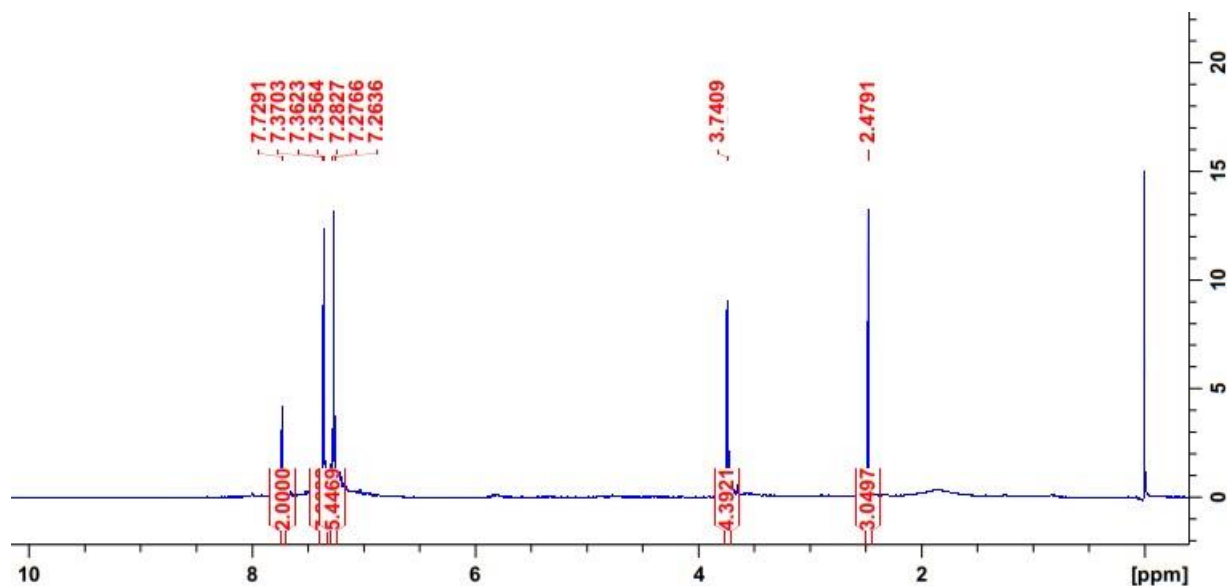

SI-Figure 7:  $^1\text{H}$  NMR spectrum of 3,5-Bis ((E)-3-Chlorobenzylidene)-N-methyl-4-piperidone.

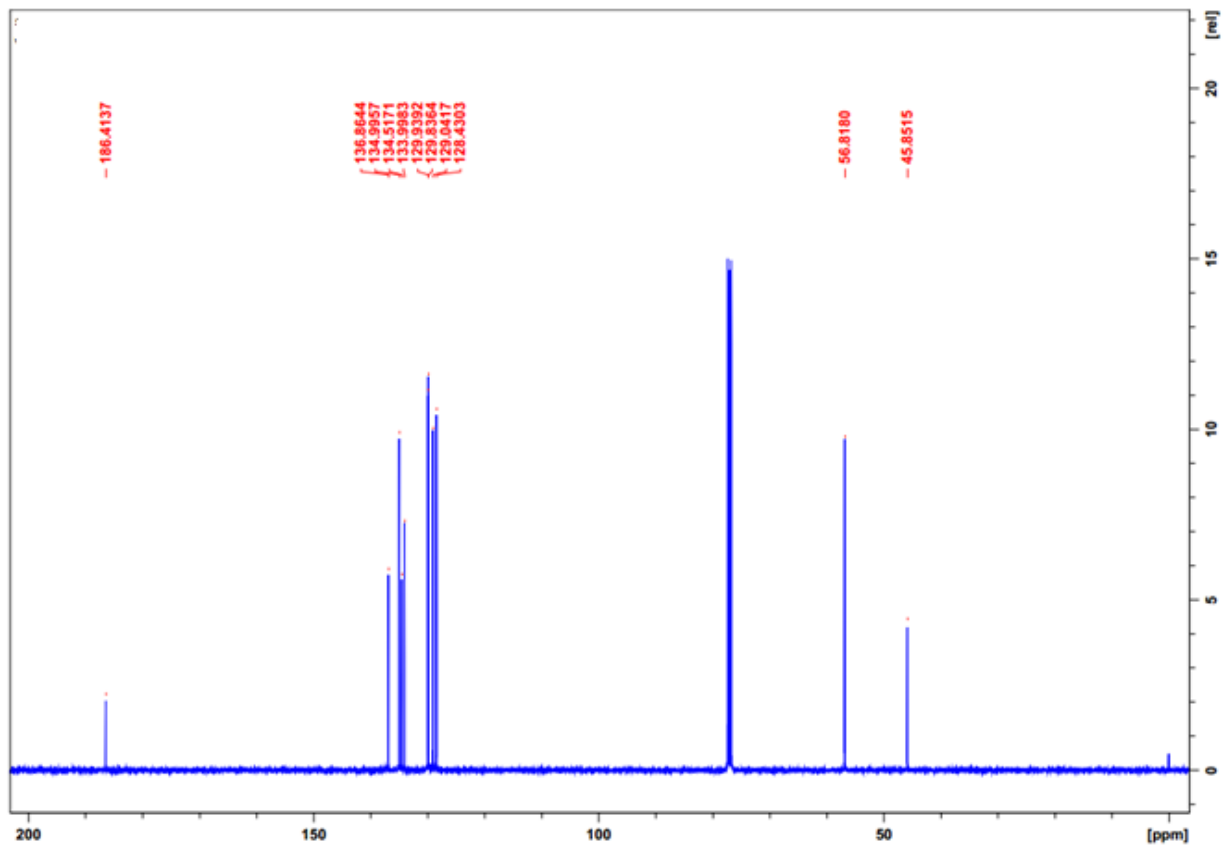

SI-Figure 8:  $^{13}\text{C}$  NMR spectrum of 3,5-Bis ((E)-3-Chlorobenzylidene)-N-methyl-4-piperidone.

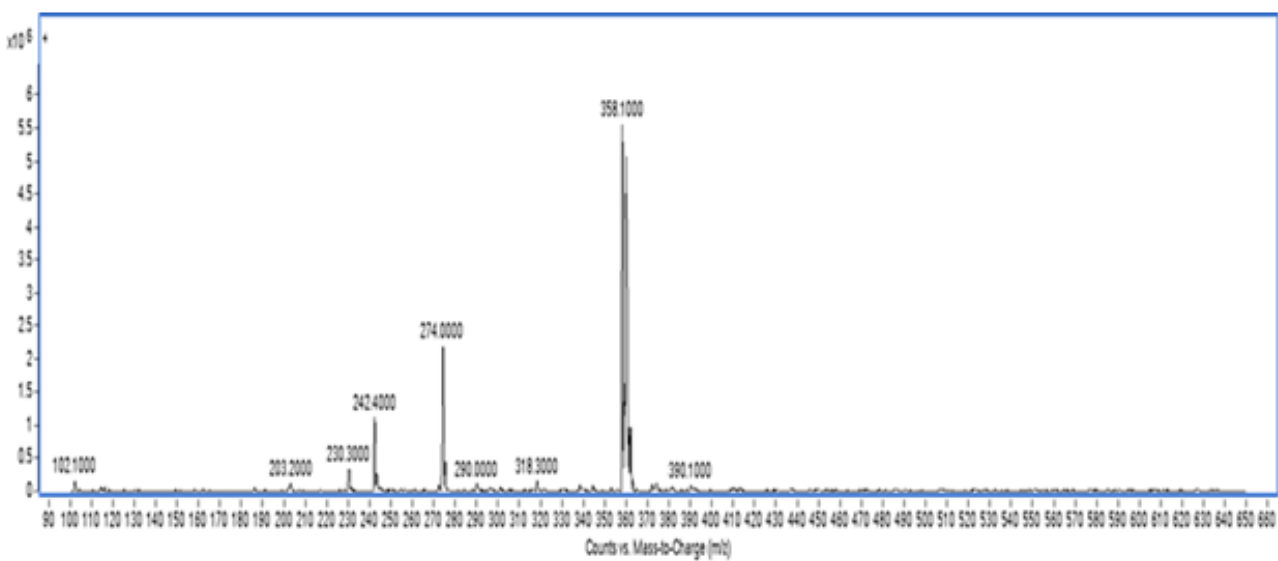

Mass:  $[\text{M}+\text{H}]^+ = m/z 358.1000$

SI-Figure 9: Mass spectrum of 3,5-Bis ((E)-3-Chlorobenzylidene)-N-methyl-4-piperidone.

### Id) 3,5-Bis ((E)-4-Chlorobenzylidene)-N-methyl-4-piperidone

Yield: 83.9%. Light yellow crystals. Recrystallized from 1. Chloroform-methanol 2. Ethyl acetate (EtOAc). mp: 176-177.5°C;  $^1\text{H}$  NMR (400 MHz,  $\text{CDCl}_3$ ):  $\delta$  7.74 (H-7, 2H, s),  $\delta$  7.39 (H-2' and H-6', 4H, d,  $J = 7.80$  Hz),  $\delta$  7.31 (H-3' and H-5', 4H, d,  $J = 7.80$  Hz),  $\delta$  3.71 (H-2, H-6, 4H, s),  $\delta$  2.46, (N-CH<sub>3</sub>, 3H, s).  $^{13}\text{C}$  NMR (400 MHz,  $\text{CDCl}_3$ ):  $\delta$  186.51 (C-4),  $\delta$  135.20 (C-4'),  $\delta$  135.1 (C-5),  $\delta$  133.5(C-7),  $\delta$  133.40 (C-1'),  $\delta$  131.61 (C-2' and 6'),  $\delta$  128.89 (C-3' and C-5'),  $\delta$  56.98 (C-6) and  $\delta$  45.91 (N-C); IR (KBr disc) ( $\text{cm}^{-1}$ ): 3006 ( $\text{sp}^2$  C-H), 2937 ( $\text{sp}^3$  C-H), 1673 (C=O), 1615 (C=C), 1587 and 1546 (aromatic skeletal bands), 1097 (C-Cl); Mass:  $[\text{M}+\text{H}]^+ = m/z$  358.1000,  $[\text{M}+2]^+ = m/z$  360,  $[\text{M}+4]^+ = m/z$  362; UV (MeOH)  $\lambda_{\text{max}}$  (nm): 235 and 332 nm.

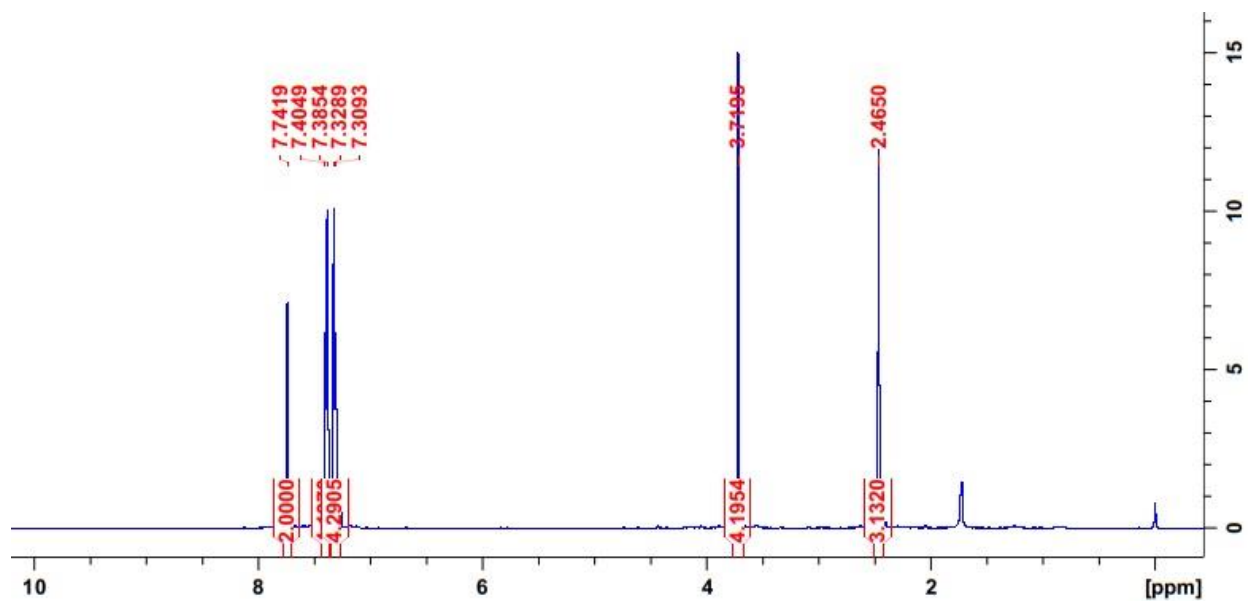

SI-Figure 10:  $^1\text{H}$  NMR spectrum of 3,5-Bis ((E)-4-Chlorobenzylidene)-N-methyl-4-piperidone.



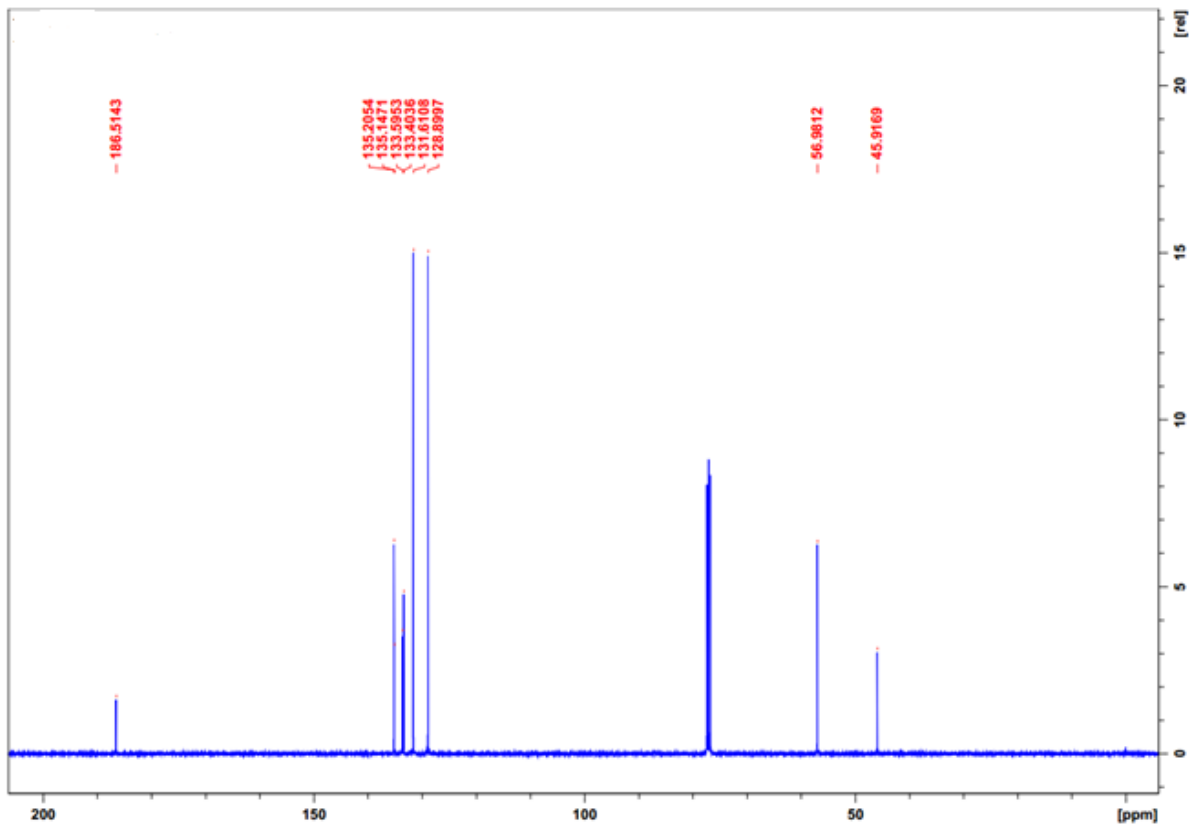

SI-Figure 11: <sup>13</sup>C NMR spectrum of 3,5-Bis ((E)-4-Chlorobenzylidene)-N-methyl-4-piperidone.

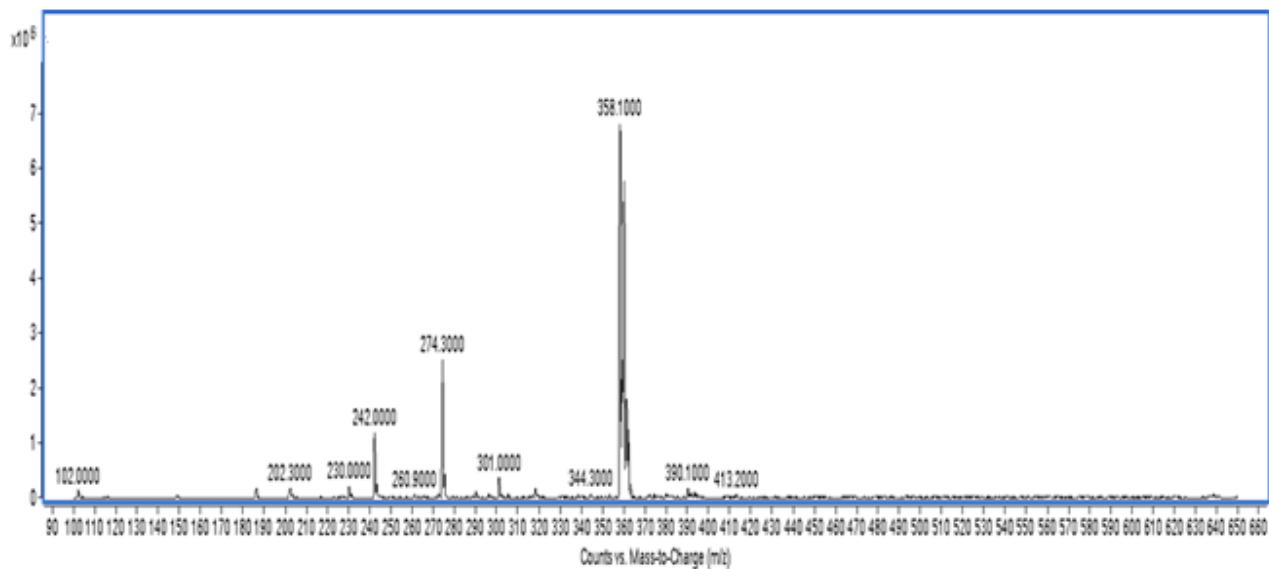

Mass:  $[M+H]^+ = m/z 358.1000$

SI-Figure 12: Mass spectrum of 3,5-Bis ((E)-4-Chlorobenzylidene)-N-methyl-4-piperidone.

### Ie) 3,5-Bis ((E)-3-bromobenzylidene)-N-methyl-4-piperidone

Yield: 84.3%. Yellow powder. Recrystallized from 1. Methanol-chloroform 2. Petroleum ether-acetone. mp: 123-125°C;  $^1\text{H}$  NMR (400 MHz,  $\text{CDCl}_3$ ):  $\delta$  7.71 (H-7, 2H, s),  $\delta$  7.51-7.49 (H-2', H-4', 4H, overlapping signals),  $\delta$  7.31-7.29 (H-5', H-6', 4H, overlapping signals),  $\delta$  3.72 (H-2, H-6, 4H, s),  $\delta$  2.47, (N-CH<sub>3</sub>, 3H, s).  $^{13}\text{C}$  NMR (400 MHz,  $\text{CDCl}_3$ ):  $\delta$  186.39 (C-4),  $\delta$  137.18 (C-3'),  $\delta$  134.04 (C-2'),  $\delta$  132.89 (C-5),  $\delta$  131.97 (C-7),  $\delta$  130.11 (C-1'),  $\delta$  128.84 (C-4'),  $\delta$  128.83 (C-6'),  $\delta$  122.69 (C-3'),  $\delta$  56.78 (C-6) and  $\delta$  45.83 (N-C); IR (KBr disc) ( $\text{cm}^{-1}$ ): 3070 ( $\text{sp}^2$  C-H), 2945 ( $\text{sp}^3$  C-H), 1670 (C=O), 1610 (C=C), 1595 and 1480 (aromatic skeletal stretch), 995 and 910 (C-H alkene out of plane bend), 845 and 870 (aromatic C-H out of plane bend); Mass:  $[\text{M}+\text{H}]^+ = m/z$  448.0000.  $[\text{M}+2]^+ = m/z$  450, and  $[\text{M}+4]^+ = m/z$  452; UV (MeOH)  $\lambda_{\text{max}}$  (nm): 322 nm.

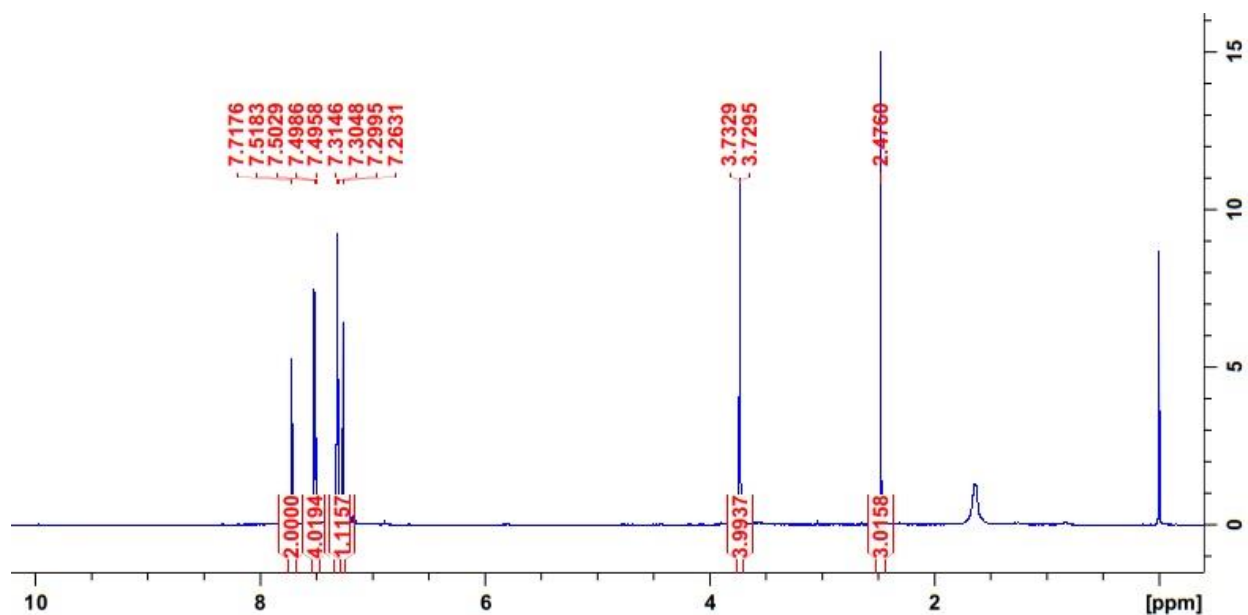

SI-Figure 13:  $^1\text{H}$  NMR spectrum of 3,5-Bis ((E)-3-bromobenzylidene)-N-methyl-4-piperidone.

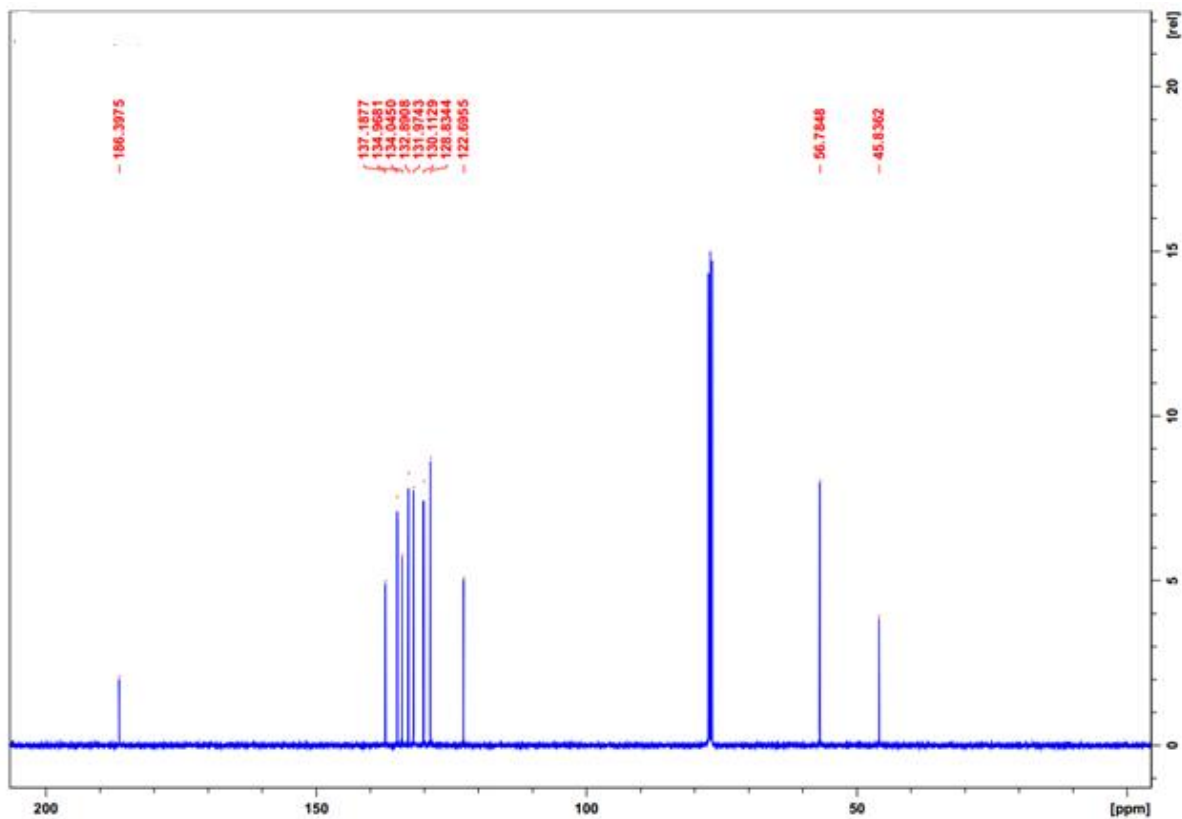

SI-Figure 14:  $^{13}\text{C}$  NMR spectrum of 3,5-Bis ((E)-3-bromobenzylidene)-N-methyl-4-piperidone.

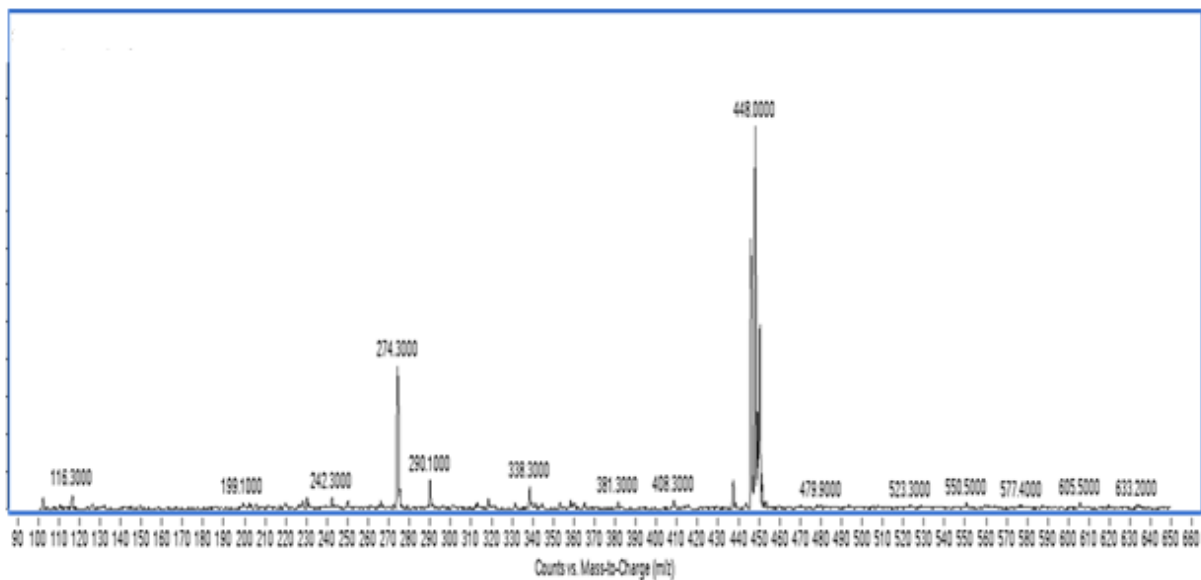

Mass:  $[\text{M}+\text{H}]^+ = m/z$  448.0000

SI-Figure 15: Mass spectrum of 3,5-Bis ((E)-3-bromobenzylidene)-N-methyl-4-piperidone.

### If) 3,5-Bis ((E)-4-bromobenzylidene)-N-methyl-4-piperidone

Yield: 99%. Yellow powder. Recrystallized from chloroform-ethyl acetate. mp: 183.7-186.3°C;  $^1\text{H}$  NMR (400 MHz,  $\text{CDCl}_3$ ):  $\delta$  7.72 (H-7, 2H, s),  $\delta$  7.55 (H-3' and H-5', 4H, d,  $J = 8.04$  Hz),  $\delta$  7.24 (H-2' and H-6', 4H, d,  $J = 8.04$  Hz),  $\delta$  3.70 (H-2, H-6, 4H, s),  $\delta$  2.46, (N-CH<sub>3</sub>, 3H, s).  $^{13}\text{C}$  NMR (400 MHz,  $\text{CDCl}_3$ ):  $\delta$  186.5 (C-4),  $\delta$  135.29 (C-5),  $\delta$  134.01 (C-7),  $\delta$  133.49 (C-1'),  $\delta$  131.86 (C-3' and C-5'),  $\delta$  131.81 (C-2' and C-6'),  $\delta$  123.51 (C-4'),  $\delta$  56.97 (C-6) and  $\delta$  45.9 (N-C); IR (KBr disc) ( $\text{cm}^{-1}$ ): 3080 ( $\text{sp}^2$  C-H), 2950 ( $\text{sp}^3$  C-H), 1670 (C=O), 1612 (C=C), 1595 and 1500 (aromatic skeletal stretch), 1000 and 915 (C-H alkene out of plane bend), 820 and 780 (aromatic C-H out of plane bend); Mass:  $[\text{M}+\text{H}]^+ = m/z$  448.0000,  $[\text{M}+2]^+ = m/z$  450, and  $[\text{M}+4]^+ = m/z$  452; UV (MeOH)  $\lambda_{\text{max}}$  (nm): 334 and 236 nm.

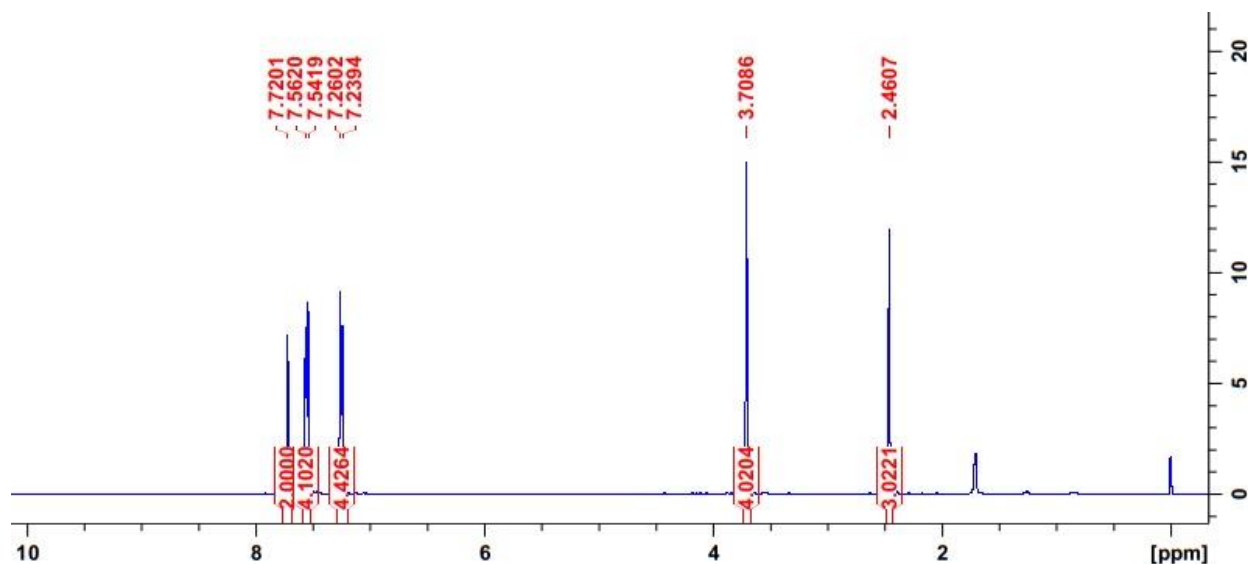

SI-Figure 16:  $^1\text{H}$  NMR spectrum of 3,5-Bis ((E)-4-bromobenzylidene)-N-methyl-4-piperidone.

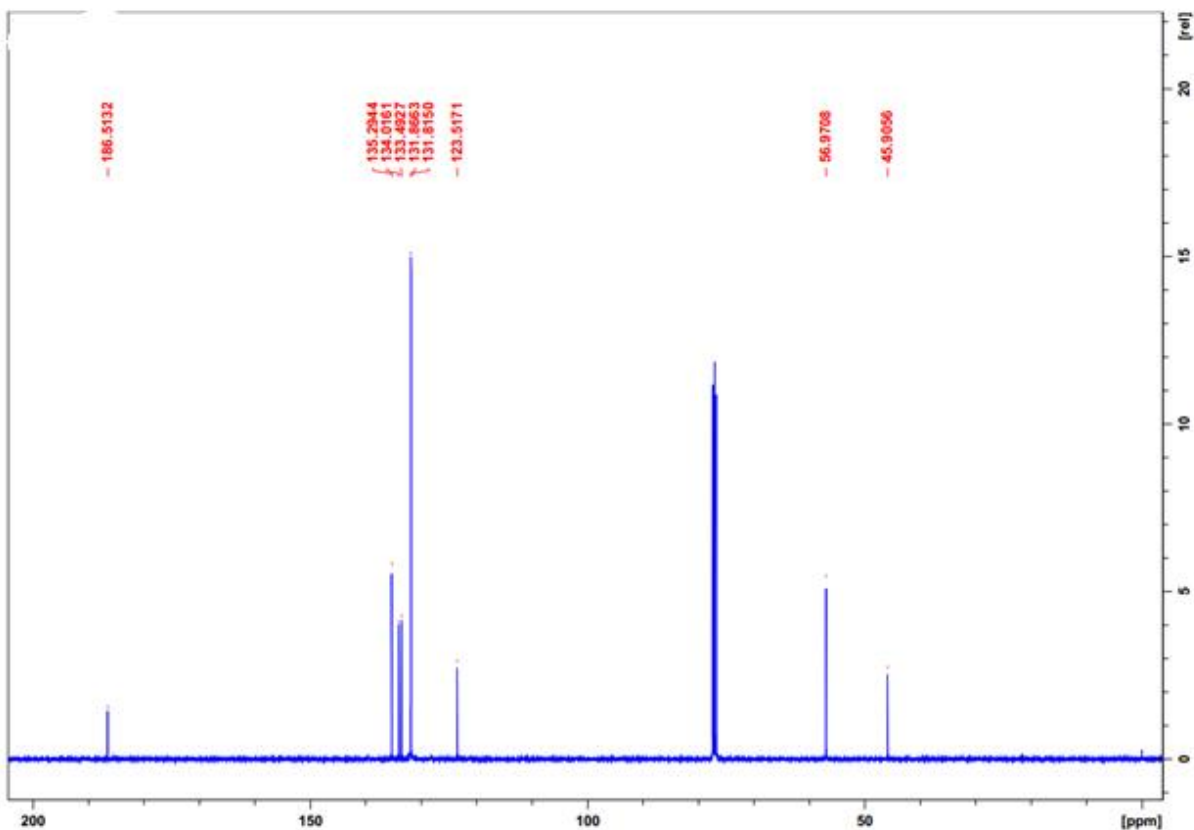

SI-Figure 17: <sup>13</sup>C NMR spectrum of 3,5-Bis ((E)-4-bromobenzylidene)-N-methyl-4-piperidone.

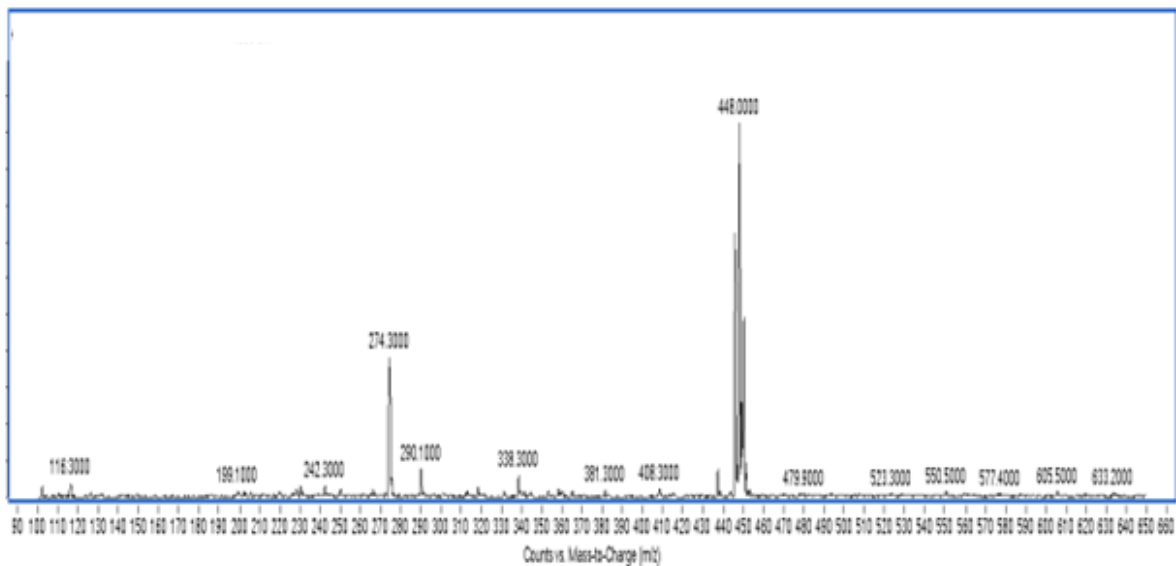

Mass:  $[M+H]^+ = m/z 448.0000$

SI-Figure 18: Mass spectrum of 3,5-Bis ((E)-4-bromobenzylidene)-N-methyl-4-piperidone.

**Ig) 3,5-Bis ((E)-4-methoxybenzylidene)-N-methyl-4-piperidone**

Yield: 77.8%. Yellow crystals. Recrystallized from chloroform-methanol. mp: 201-203.2°C; <sup>1</sup>H NMR (400 MHz, CDCl<sub>3</sub>): δ 7.77 (H-7, 2H, s), δ 7.37 (H-3' and H-5', 4H, d, J = 7.84 Hz), δ 6.94 (H-2' and 6', 4H, d, J = 7.84 Hz), δ 3.84 (O-CH, 3H, s), δ 3.76 (H-2, H-6, 4H, s), δ 2.48, (N-CH<sub>3</sub>, 3H, s). <sup>13</sup>C NMR (400 MHz, CDCl<sub>3</sub>): δ 186.83 (C-4), δ 160.2 (C-4'), δ 135.95 (C-5), δ 132.31 (C-2'), δ 131.30 (C-1'), δ 128.0 (C-6'), δ 114.06 (C-3'), δ 57.20 (O-CH<sub>3</sub>), δ 55.33 (C-6) and δ 45.94 (N-C); IR (KBr disc) (cm<sup>-1</sup>): 3011 (sp<sup>2</sup> C-H), 2929 (sp<sup>3</sup> C-H), 1670 (C=O), 1609 (C=C), 1163 (C-O), 1580 and 1510 (aromatic skeletal bands) 830 (para substitution); Mass: [M+H]<sup>+</sup> = m/z 350.2000, [M-108]<sup>+</sup> = m/z 242.2000; UV (MeOH) λ<sub>max</sub> (nm): 242 and 364 nm.

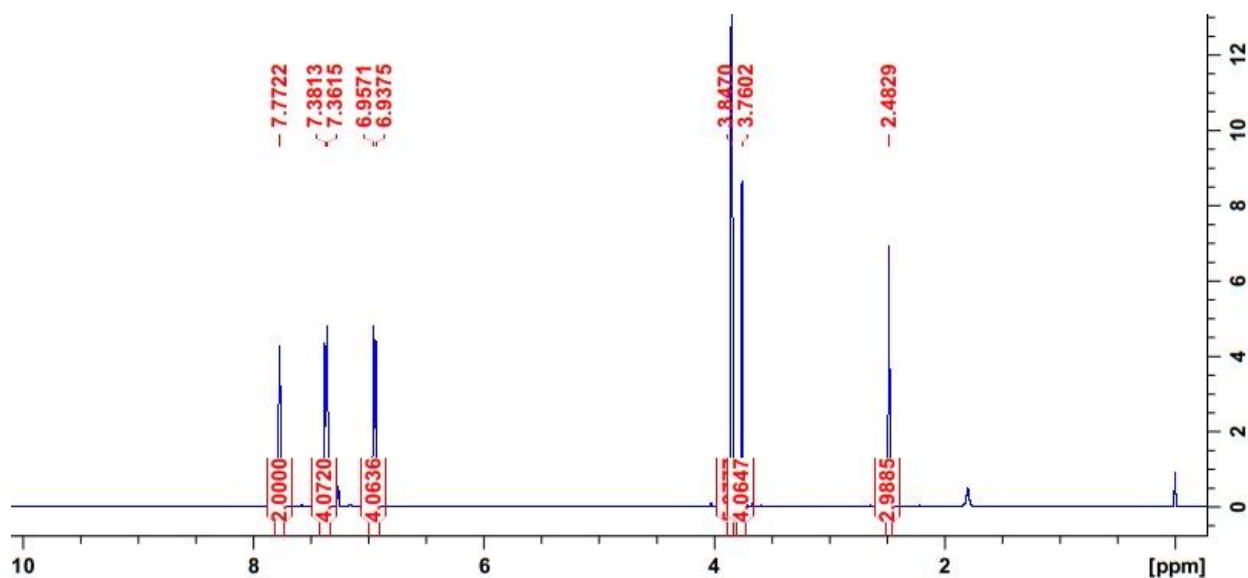

**SI-Figure 19: <sup>1</sup>H NMR spectrum of 3,5-Bis ((E)-4-methoxybenzylidene)-N-methyl-4-piperidone.**

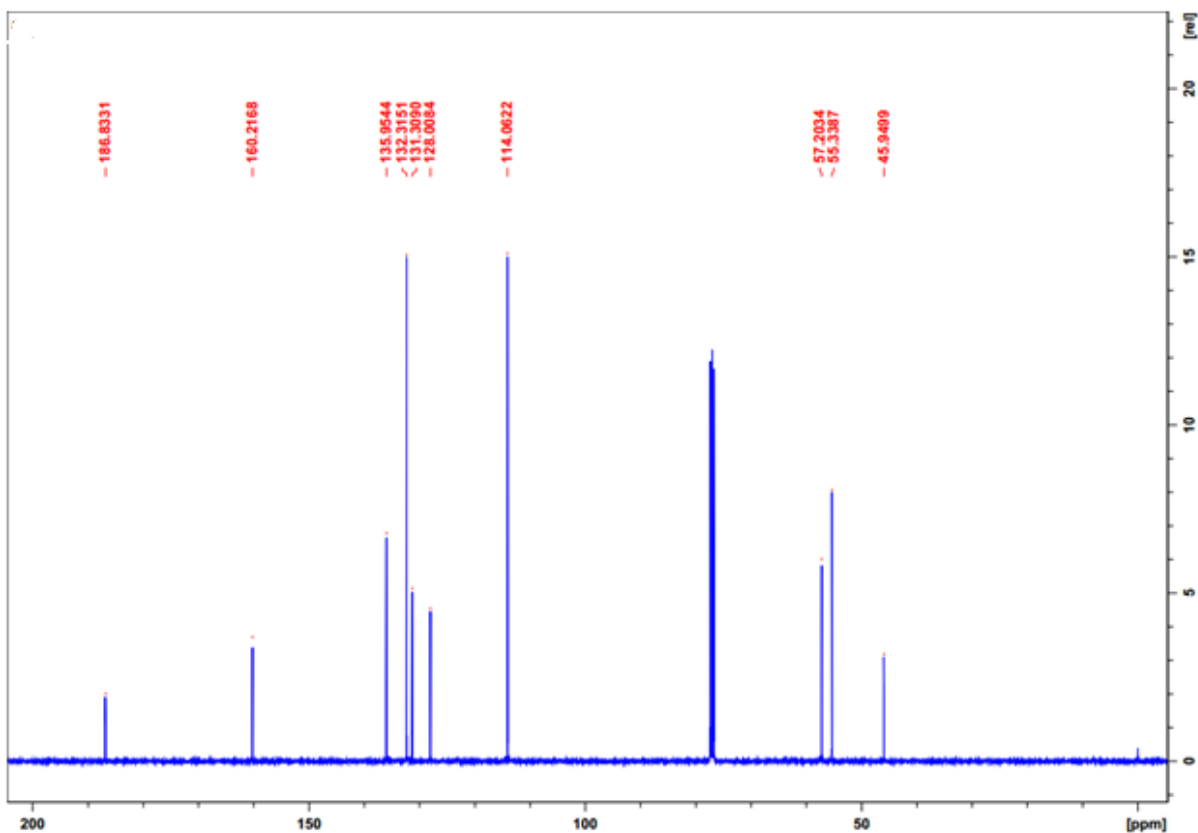

SI-Figure 20:  $^{13}\text{C}$  NMR spectrum of 3,5-Bis ((E)-4-methoxybenzylidene)-N-methyl-4-piperidone.

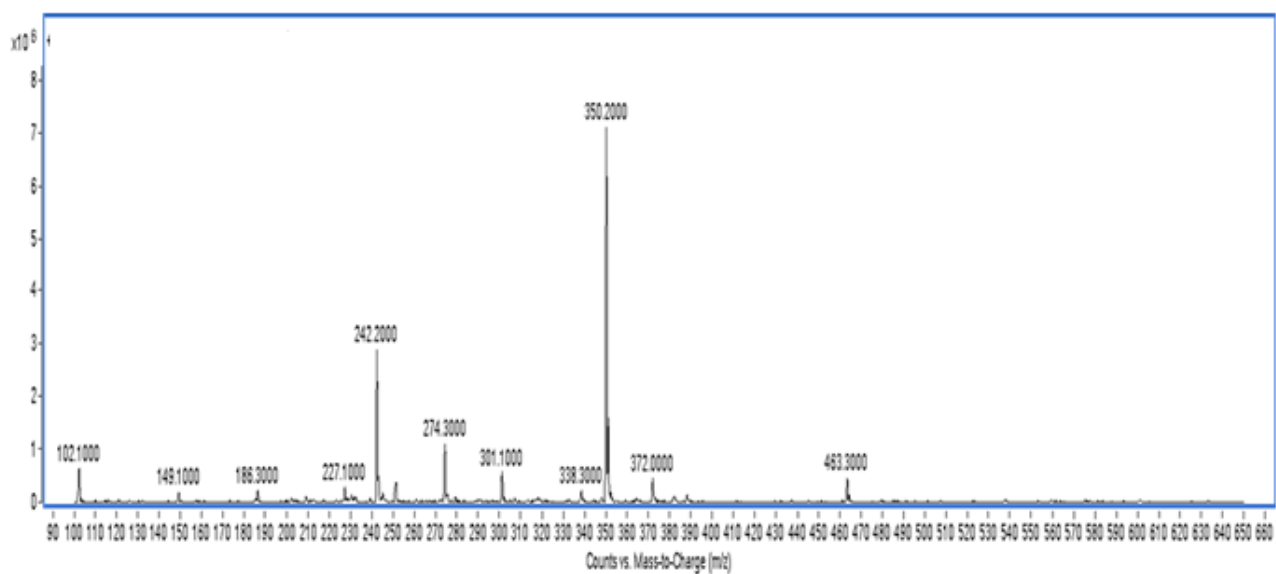

Mass:  $[\text{M}+\text{H}]^+ = m/z\ 350.2000$

SI-Figure 21: Mass spectrum of 3,5-Bis ((E)-4-methoxybenzylidene)-N-methyl-4-piperidone.

### 1h) 3,5-Bis ((E)-4-methylbenzylidene)-N-methyl-4-piperidone

Yield: 82%. Yellow crystals were obtained. It was purified by recrystallization from methanol-chloroform. mp: 200-202°C. <sup>1</sup>H NMR (400 MHz, CDCl<sub>3</sub>): δ 7.79 (H-7, 2H, s), δ 7.29 (H-2' and H-6', 4H, d, J = 7.52 Hz), δ 7.22 (H-3' and 5', 4H, d, J = 7.52 Hz), δ 3.76 (H-2, H-6, 4H, s), δ 2.46 (N-CH<sub>3</sub>, 3H, s), δ 2.38 (CH<sub>3</sub>, 3H, s). <sup>13</sup>C NMR: δ 186.96 (C-4), δ 139.30 (C-5), δ 132.49 (C-1'), δ 132.42 (C-4'), δ 129.30 (C-3' and C-5'), δ 120.50 (C-2' and C-6'), δ 57.17 (C-6) and δ 45.88 (N-C); IR (KBr disc) (cm<sup>-1</sup>): 3040 (sp<sup>2</sup> C-H), 2972 (sp<sup>3</sup> C-H), 1670 (C=O), 1603 (C=C), 1580 and 1510 (aromatic skeletal bands), 815 (para substitution); Mass: [M+H]<sup>+</sup> = m/z 317.9000; UV (MeOH) λ<sub>max</sub> (nm): 341 and 336 nm.

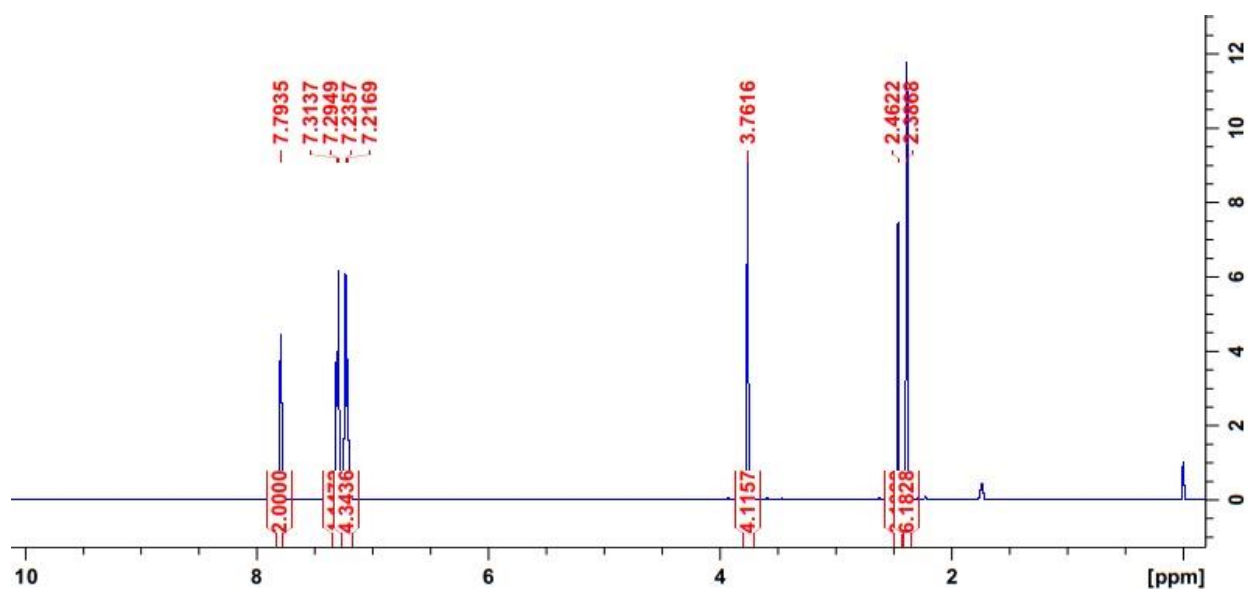

SI-Figure 22: <sup>1</sup>H NMR spectrum of 3,5-Bis ((E)-4-methylbenzylidene)-N-methyl-4-piperidone.



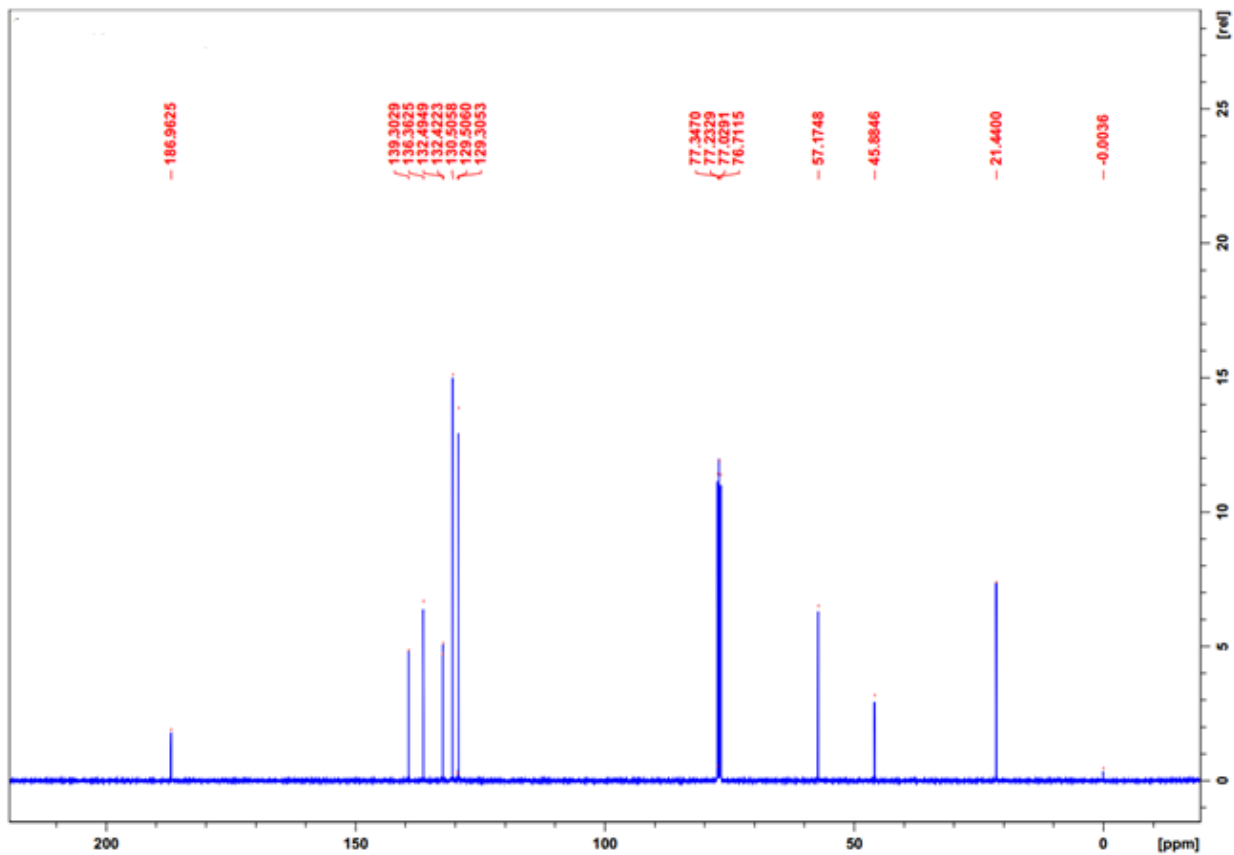

SI-Figure 23:  $^{13}\text{C}$  NMR spectrum of 3,5-Bis ((E)-4-methylbenzylidene)-N-methyl-4-piperidone.

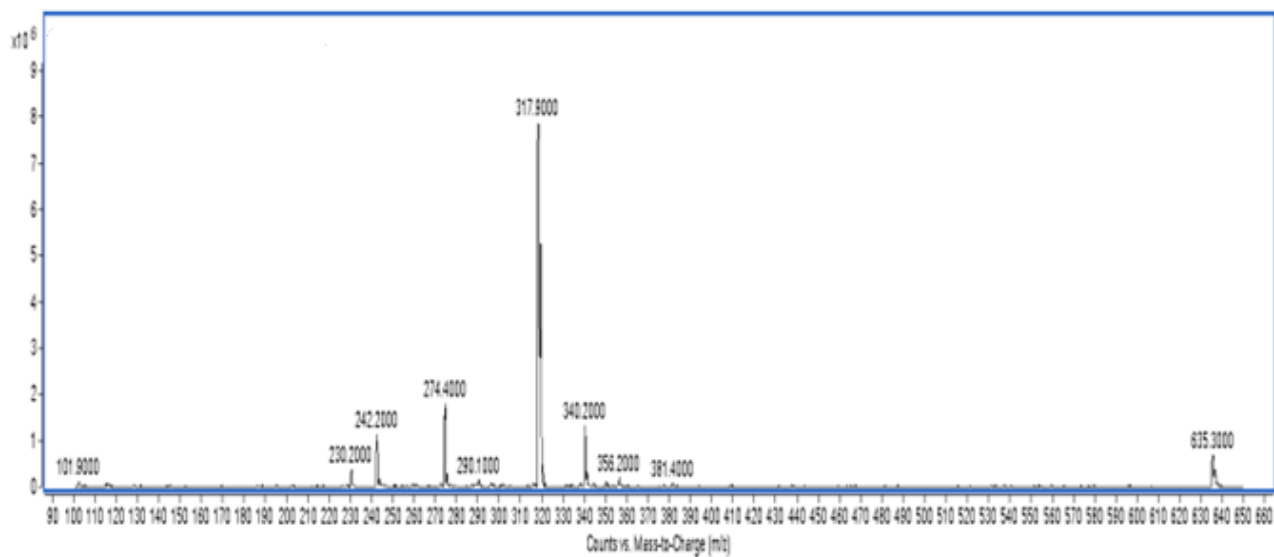

Mass:  $[\text{M}+\text{H}]^+ = m/z$  317.9000

SI-Figure 24: Mass spectrum of 3,5-Bis ((E)-4-methylbenzylidene)-N-methyl-4-piperidone.

## ii) 3,5-Bis ((E)-4-isopropylbenzylidene)-N-methyl-4-piperidone

Yield: 74.5%. Yellow powder. Recrystallized from 1.chloroform-methanol 2.chloroform-pet ether, and 3.methanol. mp: 105.5-108.5°C;  $^1\text{H}$  NMR (400 MHz,  $\text{CDCl}_3$ ):  $\delta$  7.80 (H-7, 2H, s),  $\delta$  7.34 (H-2' and H-6', 4H, d,  $J = 7.52$  Hz),  $\delta$  7.28 (H-3' and 5', 4H, d,  $J = 7.52$  Hz),  $\delta$  3.78 (H-2, H-6, 4H, s),  $\delta$  2.95 (CH, 1H, sep,  $J = 13.44$  Hz),  $\delta$  2.46, (N- $\text{CH}_3$ , 3H, s).  $\delta$  1.28 (CH- $\text{CH}_3$ , 3H, d,  $J = 6.56$  Hz).  $^{13}\text{C}$  NMR (400 MHz,  $\text{CDCl}_3$ ):  $\delta$  186.99 (C-4),  $\delta$  150.18 (C-4'),  $\delta$  136.4 (C-5),  $\delta$  132.89 (C-7),  $\delta$  132.4 (C-1'),  $\delta$  126.72 (C-3'),  $\delta$  57.16 (C-6) and  $\delta$  45.80 (N-C),  $\delta$  34.05 (C-7'); IR (KBr disc) ( $\text{cm}^{-1}$ ): 3050 ( $\text{sp}^2$  C-H), 2970 ( $\text{sp}^3$  C-H), 1670 (C=O), 1610 (C=C), 1515 and 1475 (aromatic skeletal stretch), 990 and 920 (C-H alkene out of plane bend), 825 (aromatic C-H out of plane bend); Mass:  $[\text{M}+\text{H}]^+ = m/z$  374.3000; UV (MeOH)  $\lambda_{\text{max}}$  (nm): 342 and 235 nm.

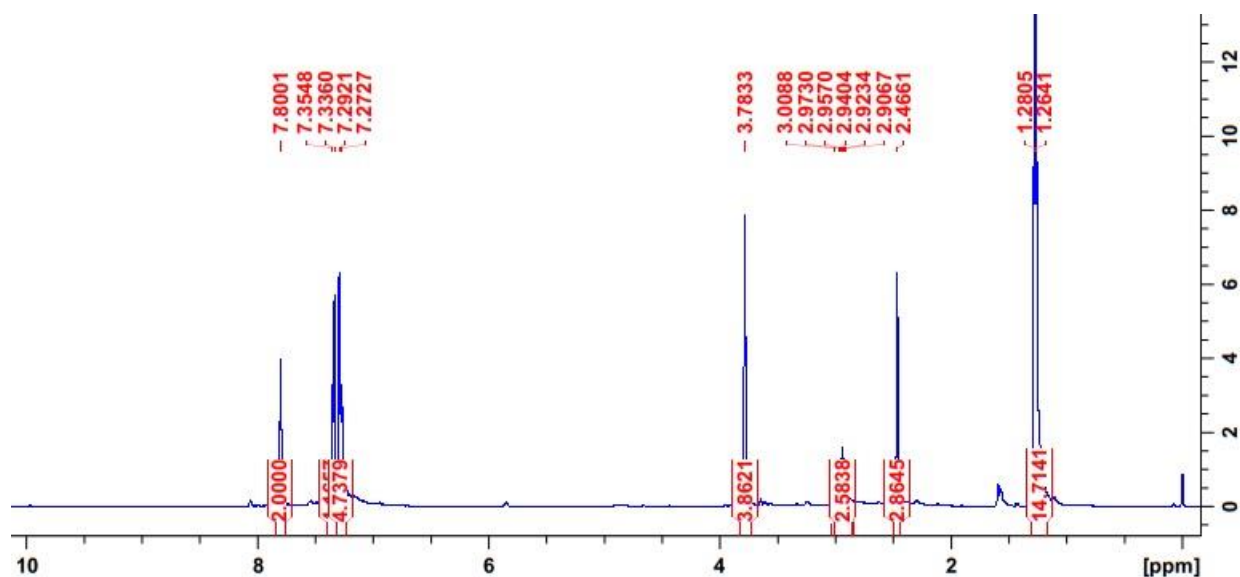

SI-Figure 25:  $^1\text{H}$  NMR spectrum of 3,5-Bis ((E)-4-isopropylbenzylidene)-N-methyl-4-piperidone.

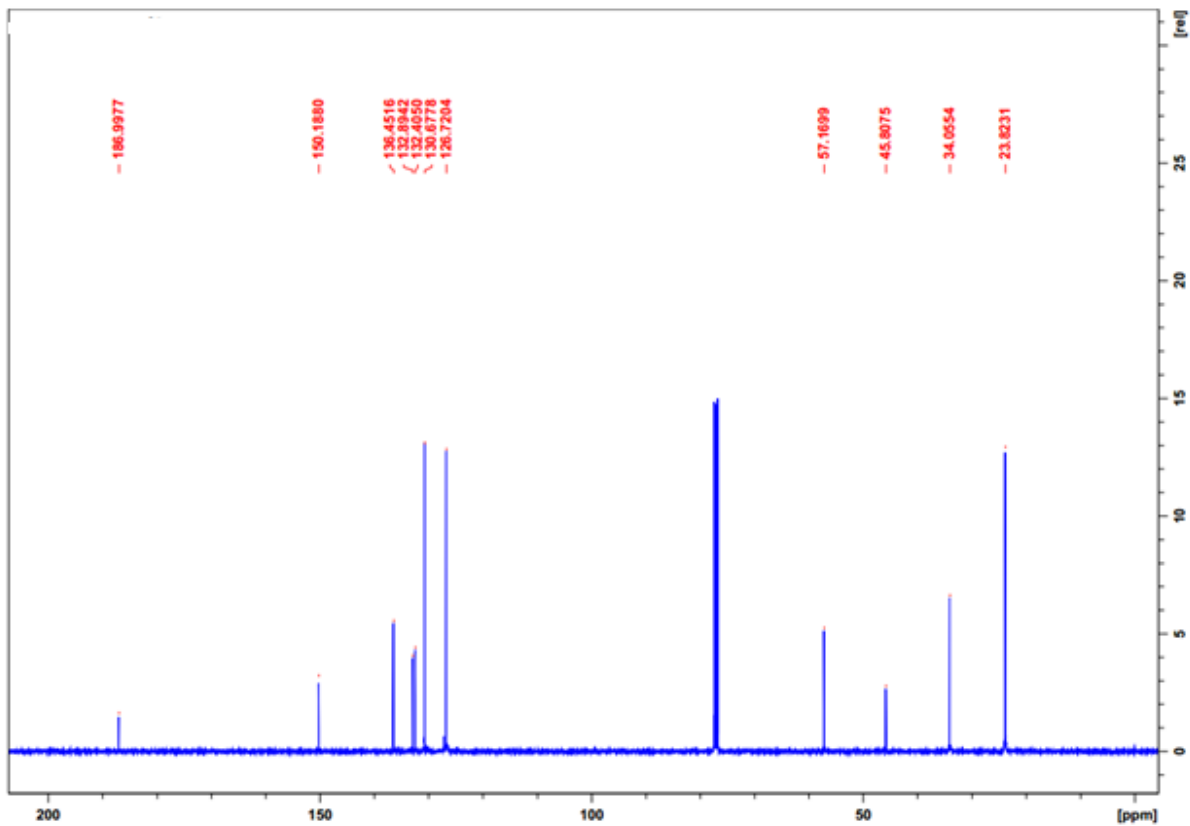

SI-Figure 26:  $^{13}\text{C}$  NMR spectrum of 3,5-Bis ((E)-4-isopropylbenzylidene)-N-methyl-4-piperidone.

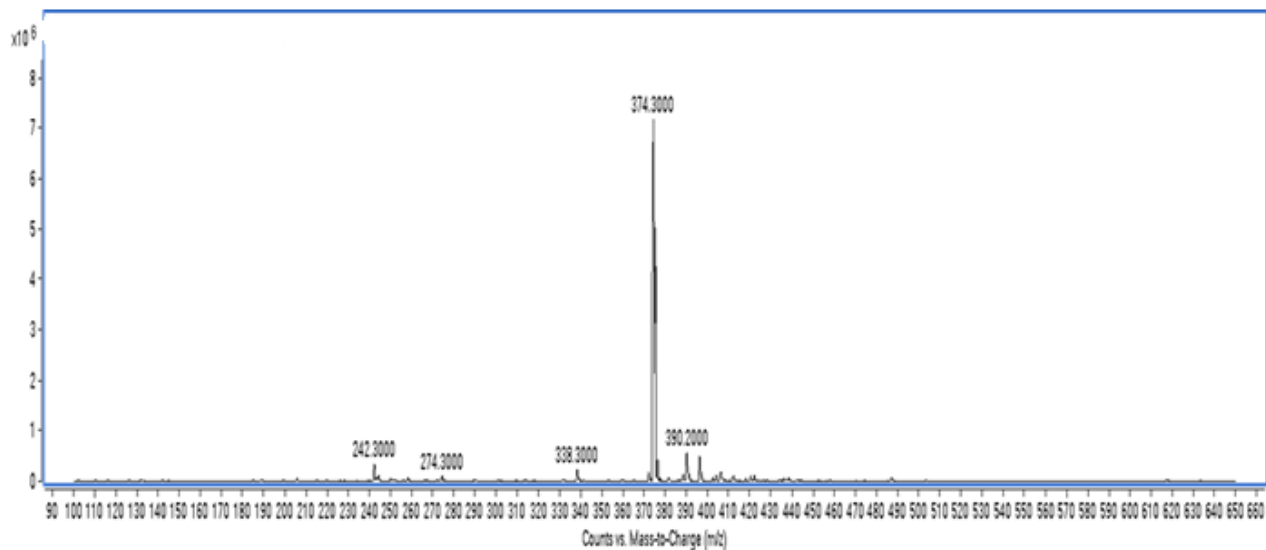

Mass:  $[\text{M}+\text{H}]^+ = m/z$  374.3000

SI-Figure 27: Mass spectrum of 3,5-Bis ((E)-4-isopropylbenzylidene)-N-methyl-4-piperidone.

### Ij) 3,5-Bis ((E)-3-trifluorobenzylidene)-N-methyl-4-piperidone

Yield: 51.6%. Yellow crystals. Recrystallized from pet ether-chloroform. mp: 143-145.2°C.  $^1\text{H}$  NMR (400 MHz,  $\text{CDCl}_3$ ) :  $\delta$  7.81 (H-7, 2H, s),  $\delta$  7.64-7.62 (H-4', H-6', 4H, two doublets overlapping),  $\delta$  7.57 (H-5', 2H, t),  $\delta$  7.56 (H-2', 2H, s),  $\delta$  3.75 (H-2, H-6, 4H, s),  $\delta$  2.47, (NCH<sub>3</sub>, 3H, s).  $^{13}\text{C}$  NMR (400 MHz,  $\text{CDCl}_3$ ):  $\delta$  186.31 (C-4),  $\delta$  135.82 (C-5),  $\delta$  134.92 (C-7),  $\delta$  134.3 (C-1'),  $\delta$  133.22 (C-6'),  $\delta$  131.61 (C-3'),  $\delta$  129.2 (C-5'),  $\delta$  126.76 (C-2'),  $\delta$  125.6 (C-4'),  $\delta$  123.82 (C-F),  $\delta$  56.73 (C-6) and  $\delta$  45.7 (N-C); IR (KBr disc) ( $\text{cm}^{-1}$ ): 3050 ( $\text{sp}^2$  C-H stretch), 2950 ( $\text{sp}^3$  C-H stretch), 1680 (C=O stretch), 1575 and 1495 (Ar skeletal bands), 1280 and 1155 (C-O stretch), 980 (C-H alkene out of plane bend), 830 and 800 (mono substituted aromatic ring); Mass:  $m/z$  426.1000; UV (MeOH)  $\lambda_{\text{max}}$  (nm): 315 and 228.

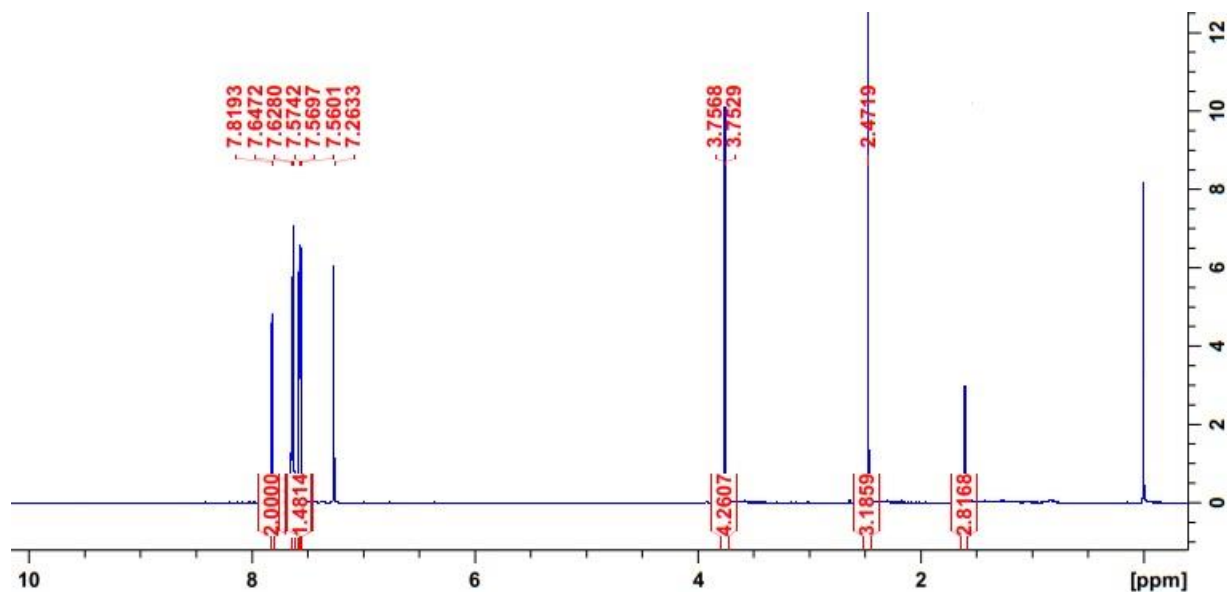

SI-Figure 28:  $^1\text{H}$  NMR spectrum of 3,5-Bis ((E)-3-trifluorobenzylidene)-N-methyl-4-piperidone.

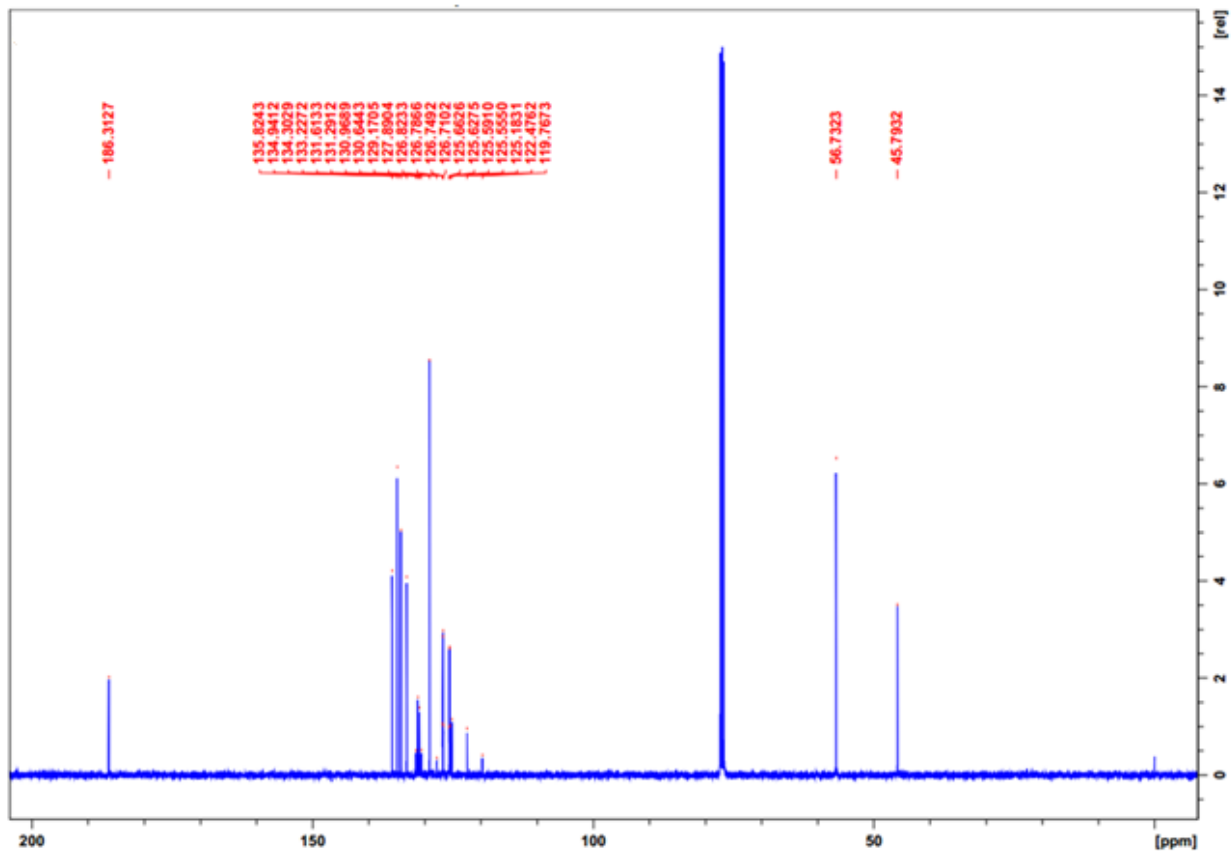

SI-Figure 29:  $^{13}\text{C}$  NMR spectrum of 3,5-Bis ((E)-3-trifluorobenzylidene)-N-methyl-4-piperidone.

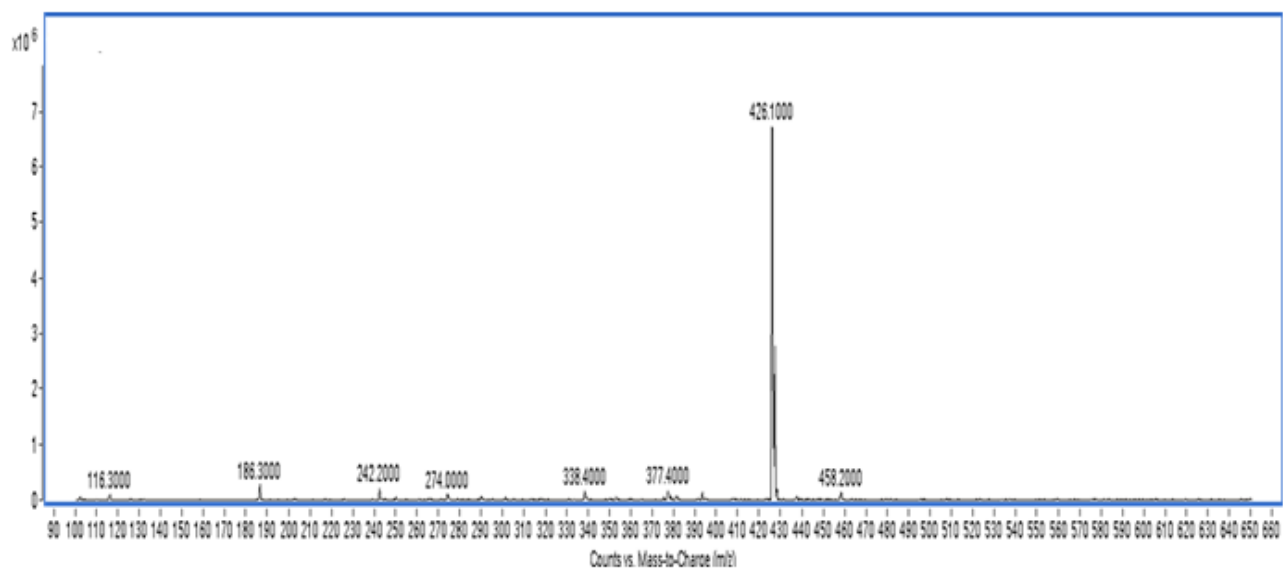

Mass:  $m/z$  426.1000

SI-Figure 30: Mass spectrum of 3,5-Bis ((E)-3-trifluorobenzylidene)-N-methyl-4-piperidone.

### Ik) 3,5-Bis ((E)-3-nitro benzylidene)-N-methyl-4-piperidone

Yield: 97.8%. It was obtained as yellow powder after recrystallization from chloroform-methanol. mp: 185-188.5°C. <sup>1</sup>H NMR (400 MHz, CDCl<sub>3</sub>): δ 8.25 (H-2', 2H, d, J = 8.84 Hz), δ 8.24 (H-4', 2H, s), δ 7.82 (H-7, 2H), δ 7.72 (H-6', 2H, d, J = 8.84 Hz), δ 7.64 (H-5', 2H, t, J = 8.84 Hz), δ 3.79 (H-2, H-6, 4H, s), δ 2.50, (N-CH, 3H, s). <sup>13</sup>C NMR (400 MHz, CDCl<sub>3</sub>): δ 185 (C-4), δ 148.37 (C-3'), δ 136.56 (C-1'), δ 136.03 (C-7), δ 135.05 (C-5), δ 133.84 (C-2'), δ 129.76 (C-4'), δ 124.4 (C-6'), δ 123.8 (C-5'), δ 56 (C-6) and δ 45 (N-C); IR (KBr disc) (cm<sup>-1</sup>): 3080 (sp<sup>2</sup> C-H), 2935 (sp<sup>3</sup> C-H), 1670 (C=O), 1610 (C=C), 1590 (aromatic skeletal stretch), 1550 and 1350 (NO<sub>2</sub> stretch), 935 (C-H alkene out of plane bend), 895, 800 and 750 (aromatic C-H out of plane bend); Mass: [M+H]<sup>+</sup> = m/z 381.3000; UV (MeOH) λ<sub>max</sub> (nm): 311, 274 and 221 nm.

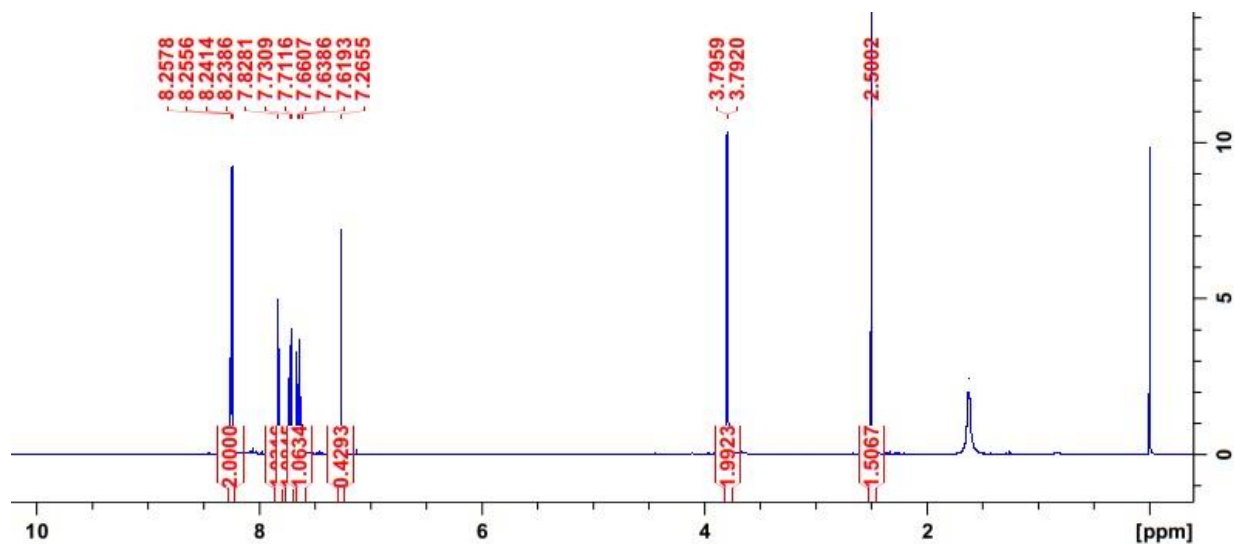

SI-Figure 31: <sup>1</sup>H NMR spectrum of 3,5-Bis ((E)-3-nitro benzylidene)-N-methyl-4-piperidone.

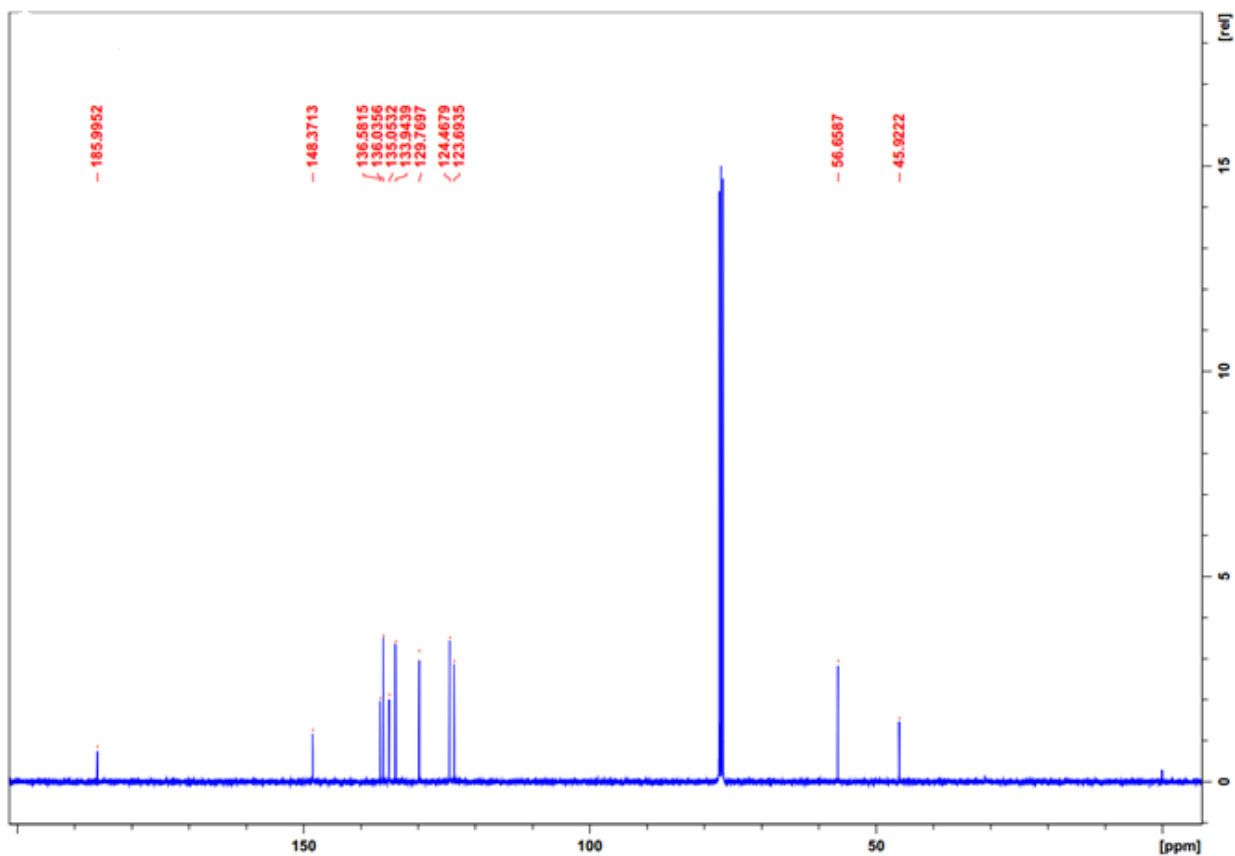

SI-Figure 32:  $^{13}\text{C}$  NMR spectrum of 3,5-Bis ((E)-3-nitro benzylidene)-N-methyl-4-piperidone.

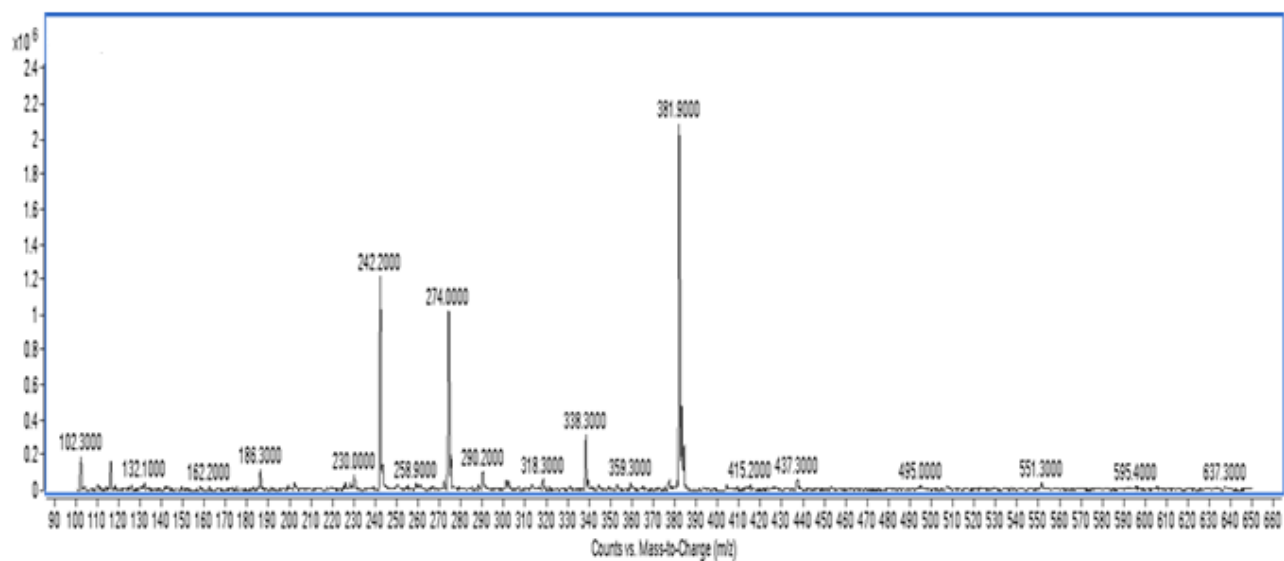

Mass:  $[\text{M}+\text{H}]^+ = m/z 381.3000$

SI-Figure 33: Mass spectrum of 3,5-Bis ((E)-3-nitro benzylidene)-N-methyl-4-piperidone.

## II) 3,5-Bis ((E)-4-methylthiobenzylidene)-N-methyl-4-piperidone

Yield: 82.8%. Yellow solid. Recrystallized from methanol-chloroform. mp: 172-174°C;  $^1\text{H}$  NMR (400 MHz,  $\text{CDCl}_3$ ):  $\delta$  7.75 (H-7, 2H, s),  $\delta$  7.32 (H-3' and H-5' 4H, d,  $J = 7.60$  Hz),  $\delta$  7.25 (H-2' and H-6', 4H, d,  $J = 7.60$  Hz),  $\delta$  3.75 (H-2, H-6, 4H, s),  $\delta$  2.47, (N- $\text{CH}_3$ , 3H, s).  $^{13}\text{C}$  NMR (400 MHz,  $\text{CDCl}_3$ ):  $\delta$  186.6 (C-4),  $\delta$  140.59 (C-4'),  $\delta$  135.81 (C-5),  $\delta$  132.81 (C-7),  $\delta$  131.7 (C-1'),  $\delta$  130.89 (C-2'),  $\delta$  125.69 (C-3'),  $\delta$  57.15 (C-6) and  $\delta$  45.90 (N-C),  $\delta$  15.13 (S-C); IR (KBr disc) ( $\text{cm}^{-1}$ ): 3014 ( $\text{sp}^2$  C-H), 2920 ( $\text{sp}^3$  C-H), 1669 (C=O), 1587 and 1546 (aromatic skeletal stretch), 1607 (C=C), 821(para- substitution); Mass:  $m/z$  381.9000; UV (MeOH)  $\lambda_{\text{max}}$  (nm): 382 and 260 nm.

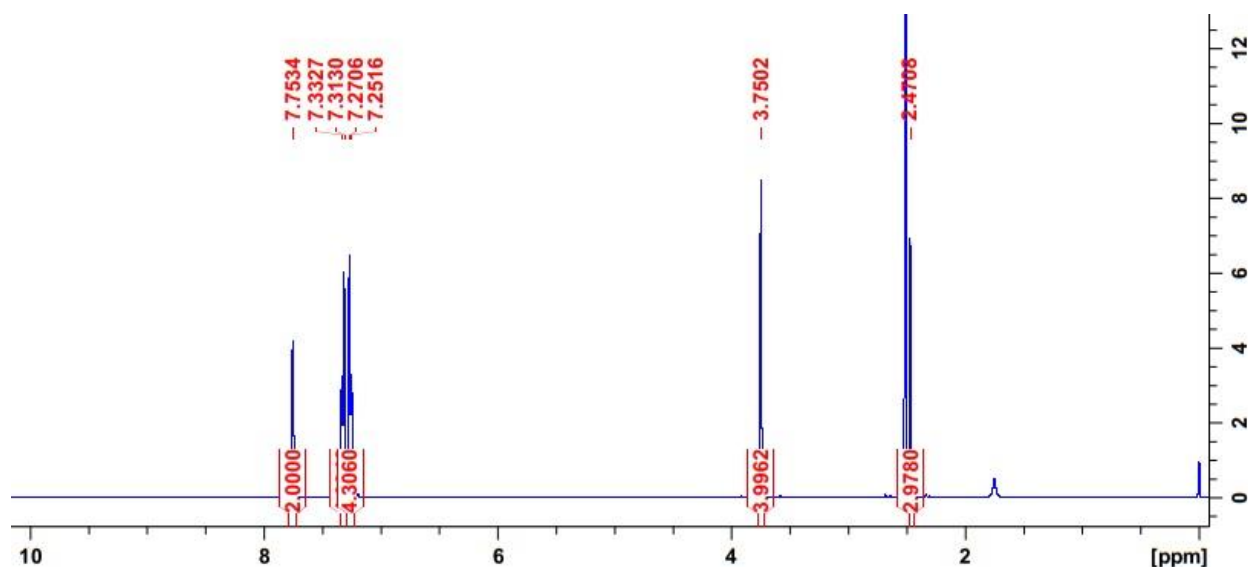

SI-Figure 34:  $^1\text{H}$  NMR spectrum of 3,5-Bis ((E)-4-methylthiobenzylidene)-N-methyl-4-piperidone.



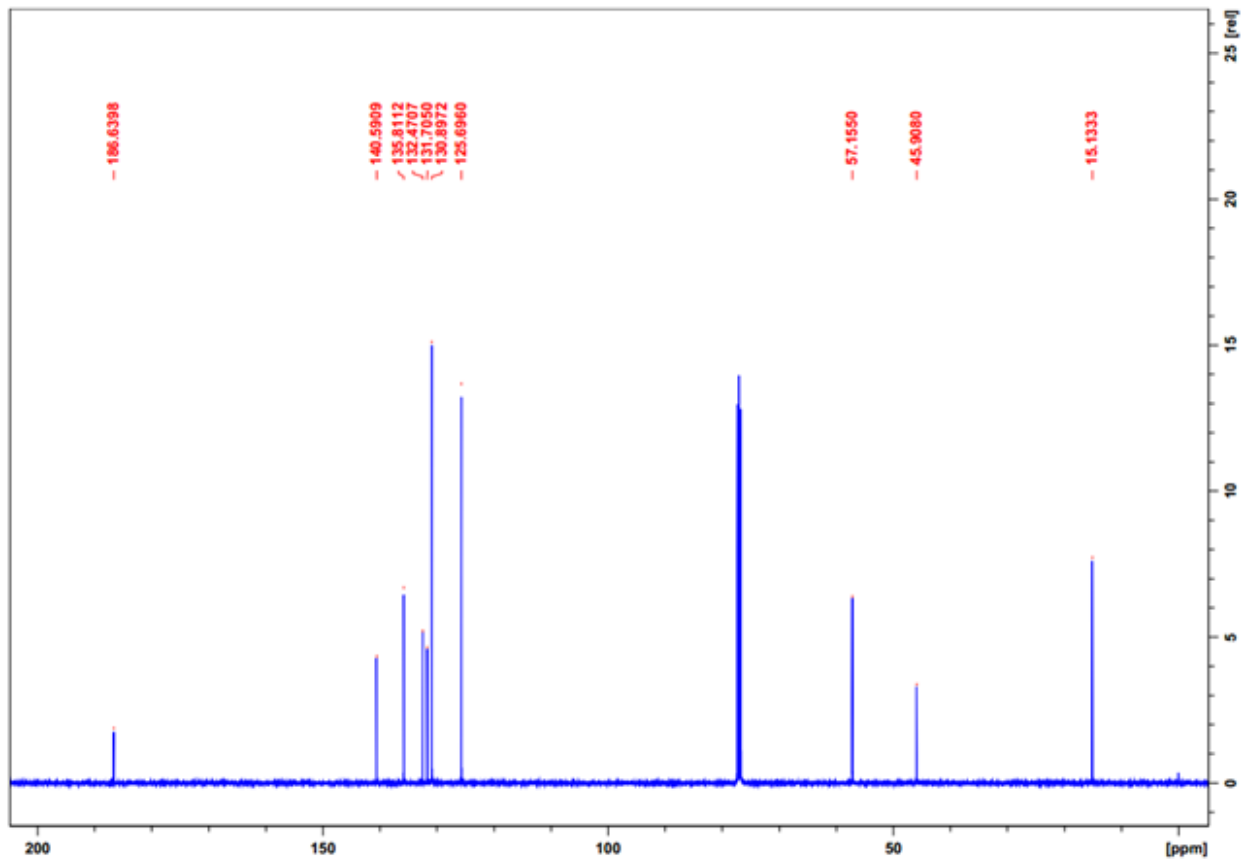

SI-Figure 35:  $^{13}\text{C}$  NMR spectrum of 3,5-Bis ((E)-4-methylthiobenzylidene)-N-methyl-4-piperidone.

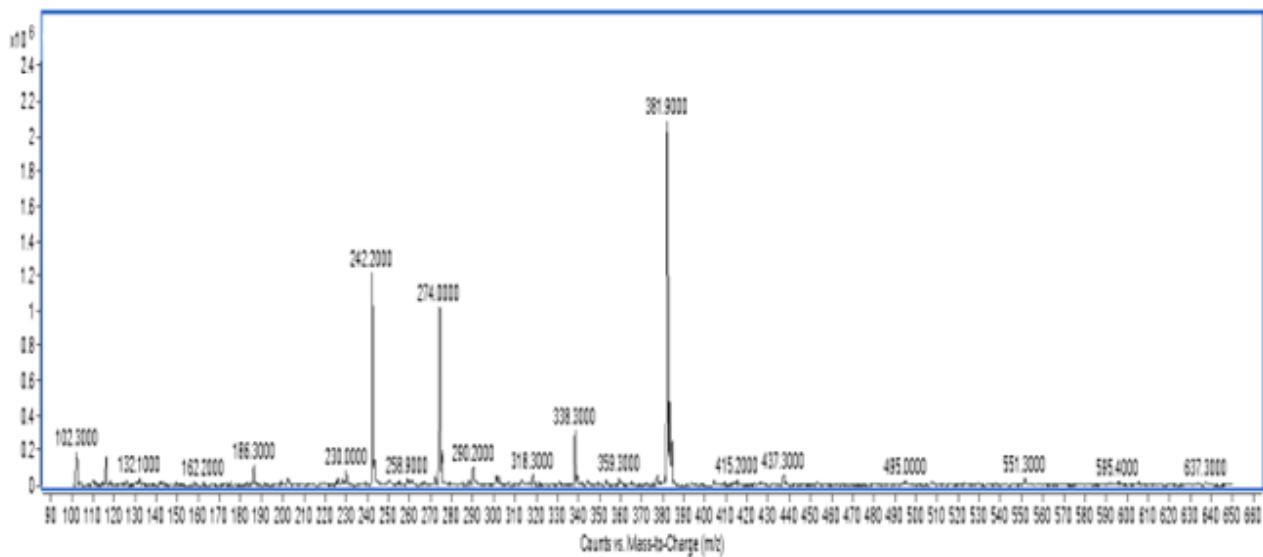

Mass:  $m/z$  381.9000

SI-Figure 36: Mass spectrum of 3,5-Bis ((E)-4-methylthiobenzylidene)-N-methyl-4-piperidone.

**Im) 3,5-Bis ((E)-2-chloro-5-(trifluoro)benzylidene)-N-methyl-4-piperidone**

Yield: 81%. Yellow crystals. Recrystallized from chloroform-methanol. mp: 154.4-157.2°C.  $^1\text{H}$  NMR (400 MHz,  $\text{CDCl}_3$ ):  $\delta$  7.94 (H-7, 2H, s),  $\delta$  7.59 (H-6', 2H, s),  $\delta$  7.58 (H-3', 2H, d, overlapping signals),  $\delta$  7.48 (H-4', 2H, d, overlapping signals)  $\delta$  3.6 (H-2, H-6, 4H, s),  $\delta$  2.39, (N-CH<sub>3</sub>, 3H, s).  $^{13}\text{C}$  NMR (400 MHz,  $\text{CDCl}_3$ ):  $\delta$  185.51 (C-4),  $\delta$  138.70 (C-2'),  $\delta$  135.51 (C-5),  $\delta$  134.56 (C-1'),  $\delta$  132.72 (C-7),  $\delta$  130.58 (C-3'),  $\delta$  129.14 (C-5'),  $\delta$  126.98 (C-6'),  $\delta$  126.69 (C-4'),  $\delta$  123.52 (C-F),  $\delta$  56.25 (C-6) and  $\delta$  45.48 (N-C); IR (KBr disc) ( $\text{cm}^{-1}$ ): 3000 ( $\text{sp}^2$  C-H), 2950 ( $\text{sp}^3$  C-H), 1685 (C=O), 1610 (C=C), 1480 (aromatic skeletal stretch), 1175 and 1120 (C-F), 1090 (aromatic C-Cl), 1000 and 910 (C-H alkene out of plane bend), 825 and 710 (aromatic C-H out of plane bend); Mass:  $[\text{M}+\text{H}]^+ = m/z$  494.0000,  $[\text{M}+2]^+ = m/z$  496; UV (MeOH)  $\lambda_{\text{max}}$  (nm): 301 nm.

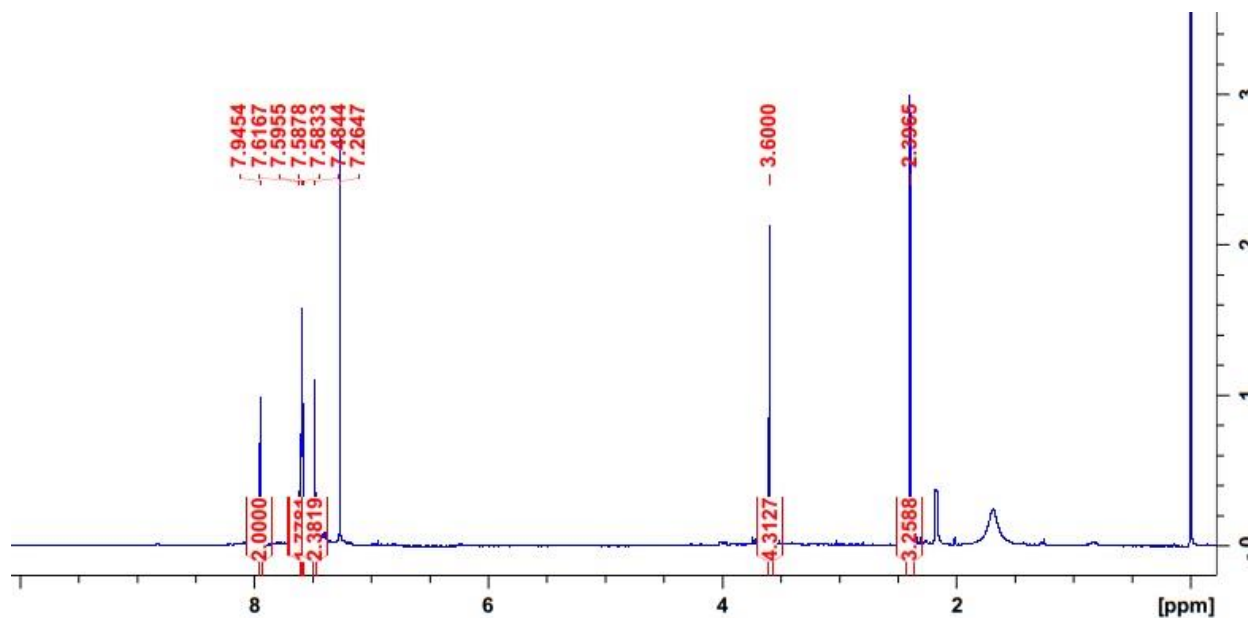

**SI-Figure 37:  $^1\text{H}$  NMR spectrum of 3,5-Bis ((E)-2-chloro-5-(trifluoro)benzylidene)-N-methyl-4-piperidone.**

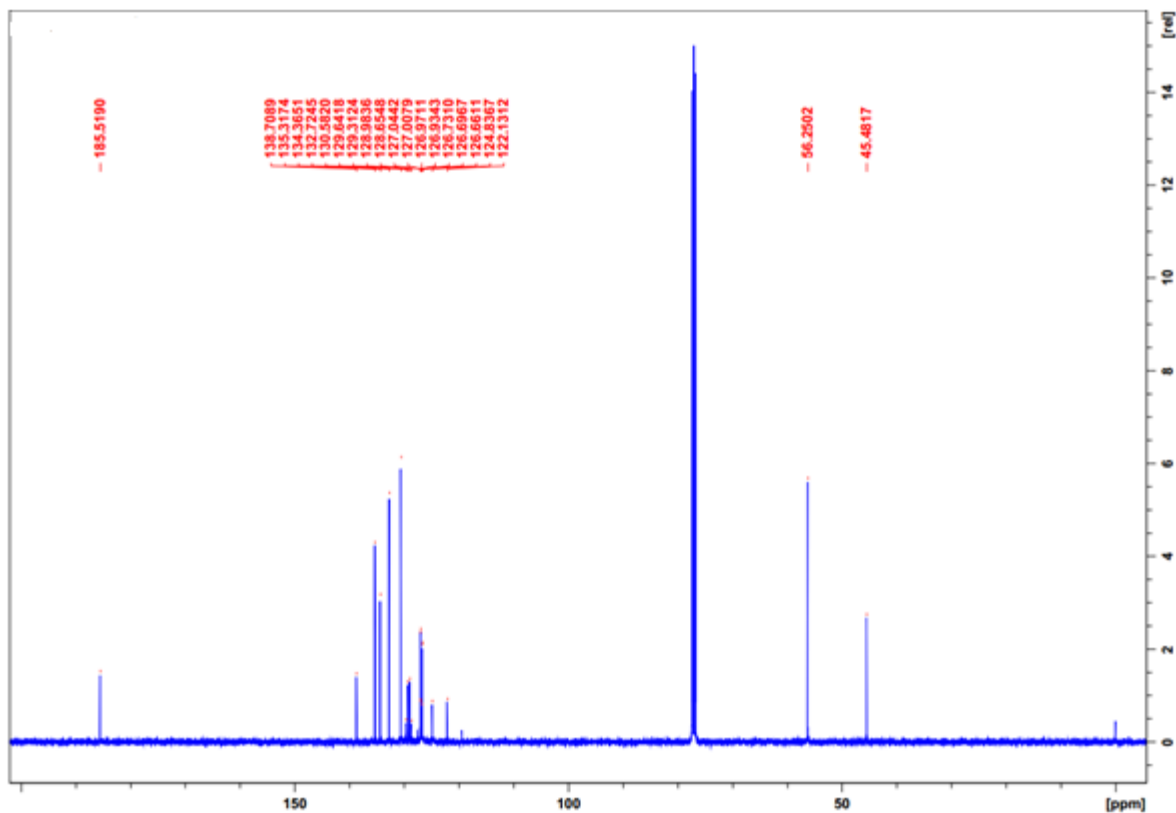

SI-Figure 38:  $^{13}\text{C}$  NMR spectrum of 3,5-Bis ((E)-2-chloro-5-(trifluoro)benzylidene)-N-methyl-4-piperidone.

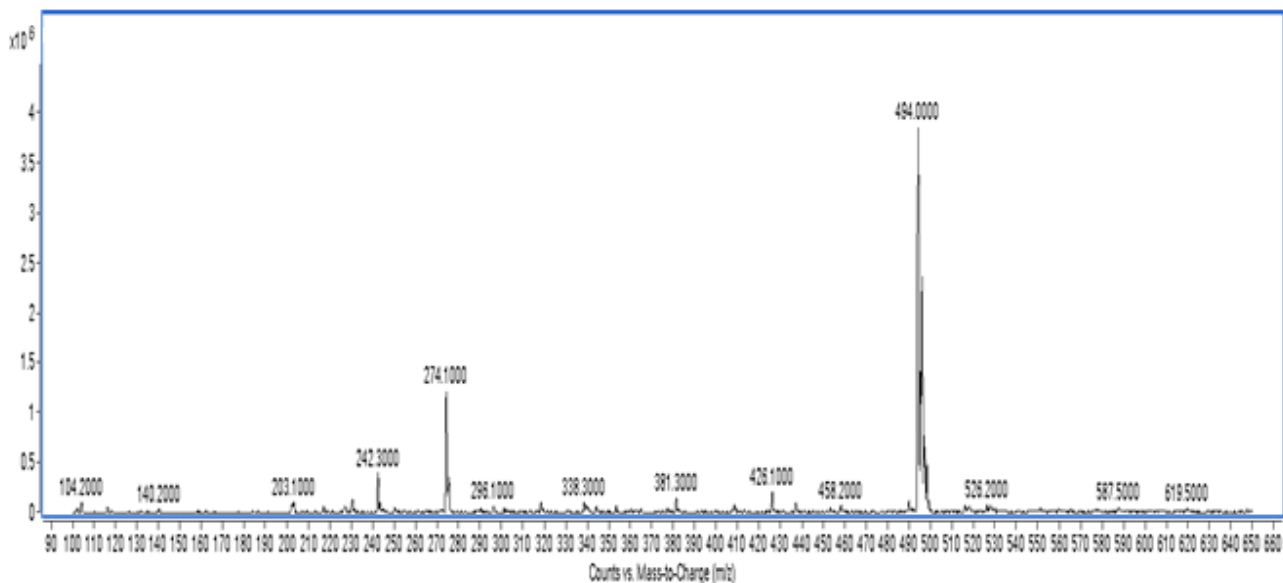

Mass:  $[\text{M}+\text{H}]^+ = m/z 494.0000$

SI-Figure 39: Mass spectrum of 3,5-Bis ((E)-2-chloro-5-(trifluoro)benzylidene)-N-methyl-4-piperidone.

### In) 3,5-Bis ((E)-2,5-dimethoxybenzylidene)-N-methyl-4-piperidone

Yield: 75.2%. Yellow crystals. Recrystallized from 1. Chloroform-methanol 2. Pet ether-acetone; mp: 135-137.3°C;  $^1\text{H}$  NMR (400 MHz,  $\text{CDCl}_3$ ):  $\delta$  8.0 (H-7, 2H, s),  $\delta$  6.88 (H-4', 2H, s),  $\delta$  6.84 (H-3' 2H, d,  $J = 8.96$  Hz),  $\delta$  6.76 (H-6', 2H, d,  $J = 8.96$  Hz),  $\delta$  3.79 (O-CH, 3H, s),  $\delta$  3.66 (H-2, H-6, 4H, s),  $\delta$  2.38, (N-CH<sub>3</sub>, 3H, s).  $^{13}\text{C}$  NMR (400 MHz,  $\text{CDCl}_3$ ):  $\delta$  186.81 (C-4),  $\delta$  152.86 (C-2'),  $\delta$  152.84 (C-5'),  $\delta$  133.34 (C-5),  $\delta$  132.34 (C-7),  $\delta$  125.23 (C-1'),  $\delta$  116.34 (C-6'),  $\delta$  114.72 (C-4'),  $\delta$  111.73 (C-3'),  $\delta$  57.05 (O-CH),  $\delta$  56.08 (C-6) and  $\delta$  45.60 (N-C); IR (KBr disc) ( $\text{cm}^{-1}$ ): 3007 ( $\text{sp}^2$  C-H), 2940 ( $\text{sp}^3$  C-H), 1663 (C=O), 1578 and 1524 (aromatic skeletal stretch), 1604 (C=C); Mass:  $[\text{M}+\text{H}]^+ = m/z$  410.2000,  $[\text{M}-31]^+ = m/z$  378.2000; UV (MeOH)  $\lambda_{\text{max}}$  (nm): 286 and 310 nm.

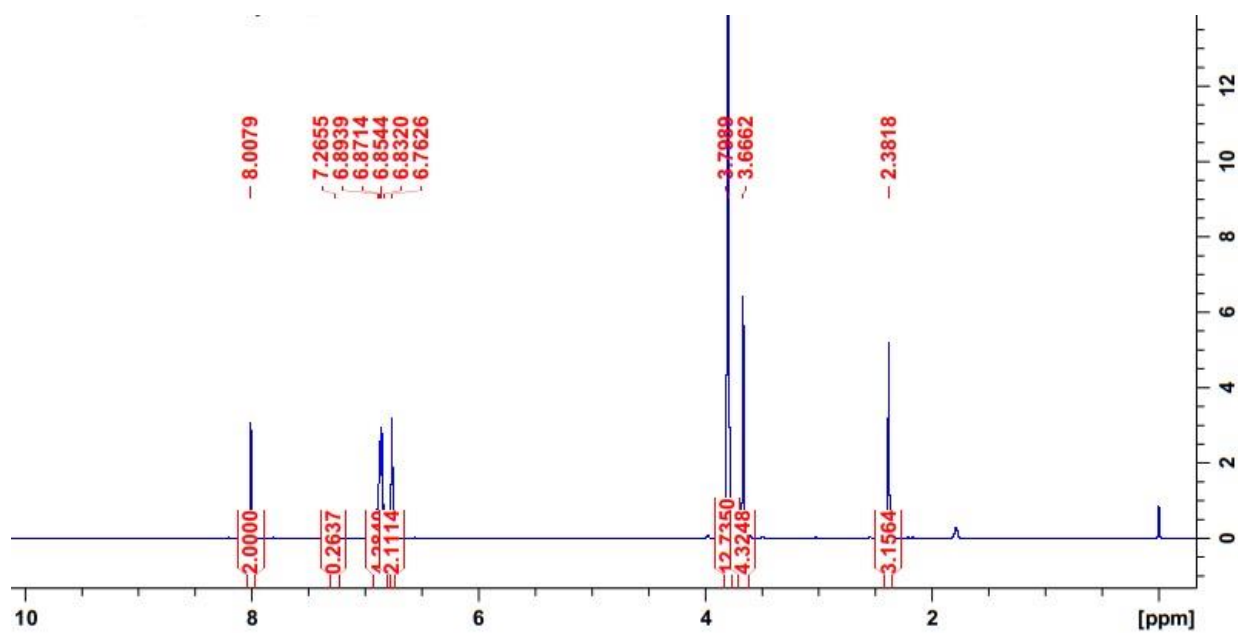

SI-Figure 40:  $^1\text{H}$  NMR spectrum of 3,5-Bis ((E)-2,5-dimethoxybenzylidene)-N-methyl-4-piperidone.

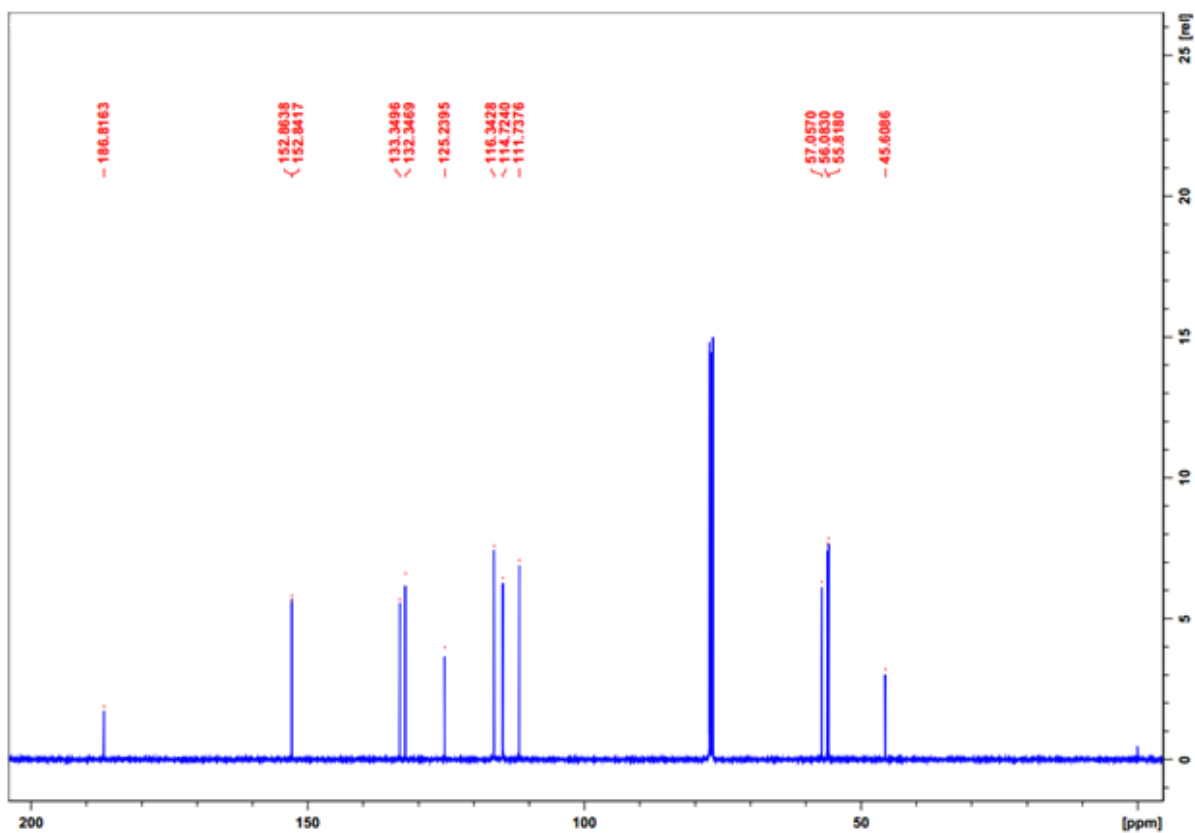

SI-Figure 41:  $^{13}\text{C}$  NMR spectrum of 3,5-Bis ((E)-2,5-dimethoxybenzylidene)-N-methyl-4-piperidone.

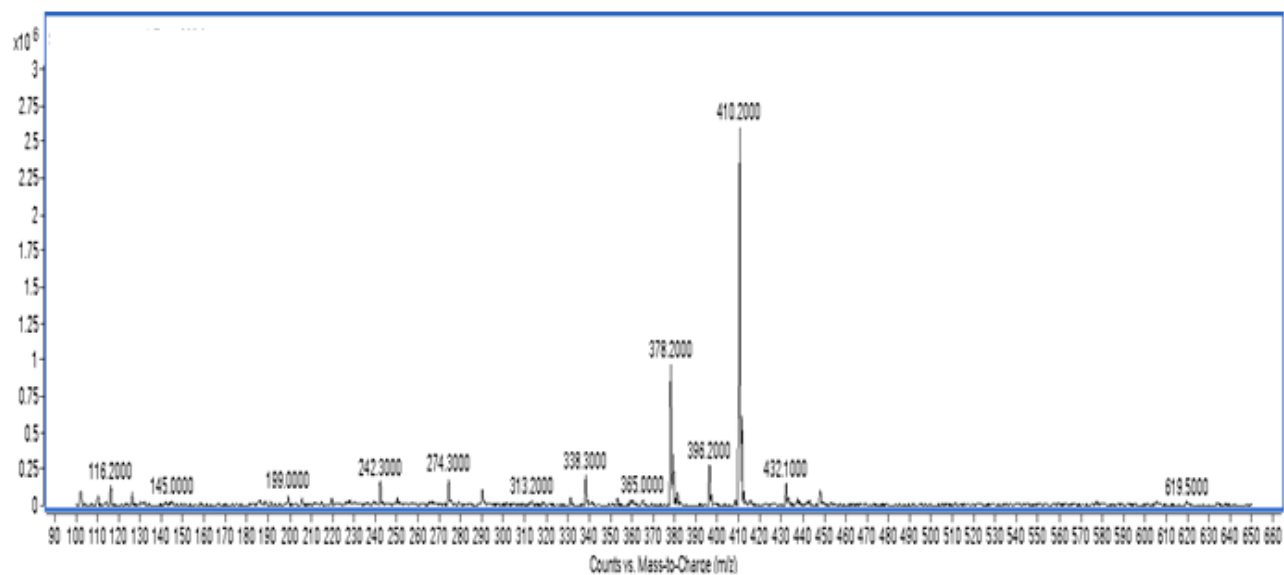

Mass:  $[\text{M}+\text{H}]^+ = m/z$  410.2000

SI-Figure 42: Mass spectrum of 3,5-Bis ((E)-2,5-dimethoxybenzylidene)-N-methyl-4-piperidone.

### Io) 3,5-Bis ((E)-3,4-dimethoxybenzylidene)-N-methyl-4-piperidone

Yield: 56.4%. Bright yellow crystals. Recrystallized from methanol-chloroform. mp: 167.2-169.7°C;  $^1\text{H}$  NMR (400 MHz,  $\text{CDCl}_3$ ):  $\delta$  7.76 (H-7, 2H, s),  $\delta$  7.02 (H-6', 2H, d,  $J = 8.16$  Hz),  $\delta$  6.94 (H-2', 2H, s),  $\delta$  6.92 (H-5', 2H, d,  $J = 8.16$  Hz),  $\delta$  3.93 (O- $\text{CH}_3$  (3'), 3H, s),  $\delta$  3.91 (O-CH (4'), 3H, s),  $\delta$  3.79 (H-2, H-6, 4H, s),  $\delta$  2.48, (N- $\text{CH}_3$ , 3H, s).  $^{13}\text{C}$  NMR (400 MHz,  $\text{CDCl}_3$ ):  $\delta$  186.68 (C-4),  $\delta$  149.91 (C-4'),  $\delta$  148.75 (C-3'),  $\delta$  136.31 (C-5),  $\delta$  131.54 (C-7),  $\delta$  128.25 (C-1'),  $\delta$  123.7 (C-6'),  $\delta$  113.85 (C-2'),  $\delta$  110.93 (C-5'),  $\delta$  111.73 (C-3'),  $\delta$  57.14 (O-CH),  $\delta$  55.94 (C-6) and  $\delta$  45.82 (N-C); IR (KBr disc) ( $\text{cm}^{-1}$ ): 3063 ( $\text{sp}^2$  CH), 2985 ( $\text{sp}^3$  C-H), 1660 (C=O), 1600 (C=C), 1576 and 1514 (aromatic skeletal band), 1147 and 1022 (C-O); Mass:  $[\text{M}+\text{H}]^+ = m/z$  410.2000 and  $[\text{M}-\text{OCH}_3]^+ = m/z$  378.2000; UV (MeOH)  $\lambda_{\text{max}}$  (nm): 256 and 379 nm.

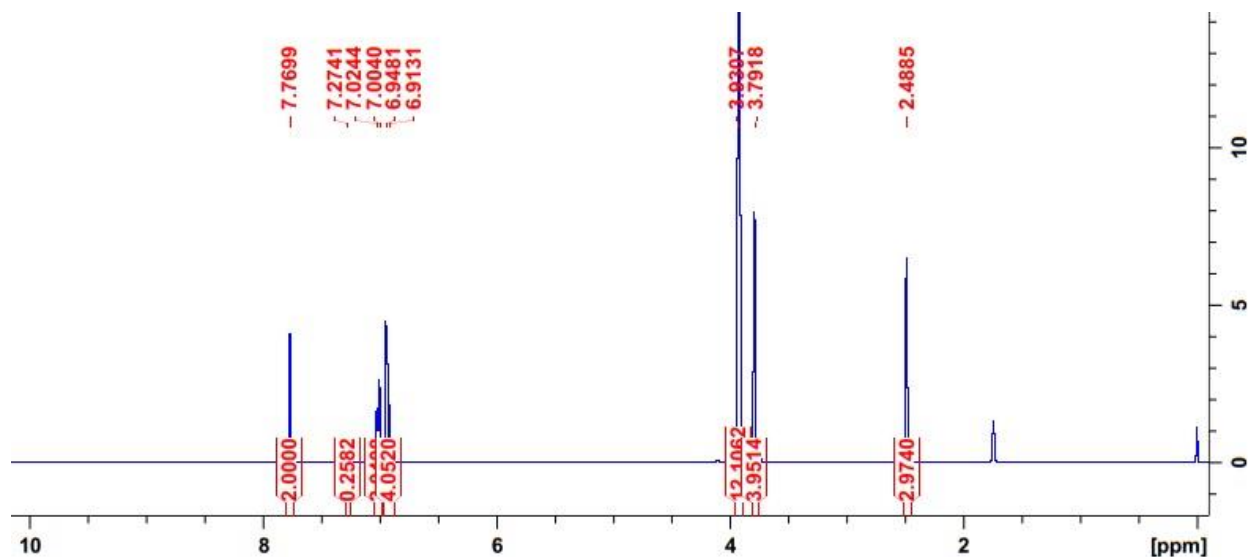

SI-Figure 43:  $^1\text{H}$  NMR spectrum of 3,5-Bis ((E)-3,4-dimethoxybenzylidene)-N-methyl-4-piperidone.

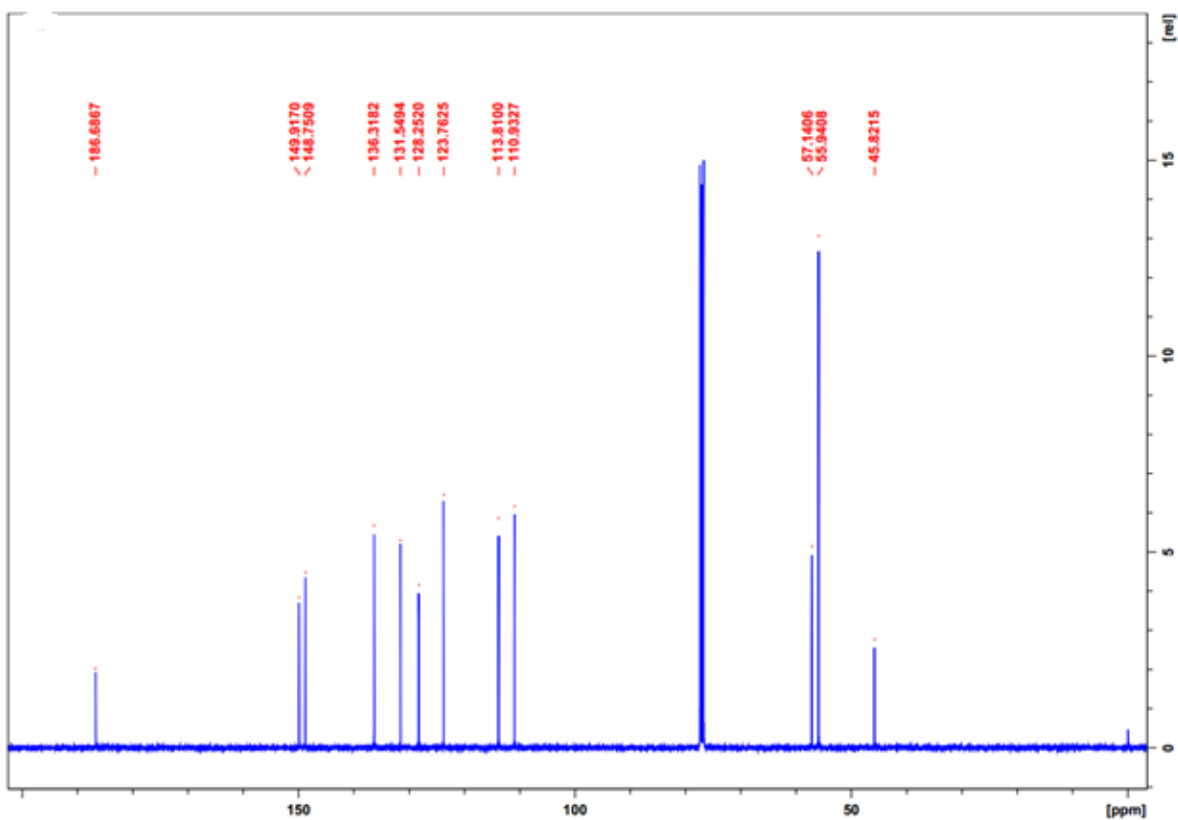

**Figure 44:**  $^{13}\text{C}$  NMR spectrum of 3,5-Bis ((E)-3,4-dimethoxybenzylidene)-N-methyl-4-piperidone.

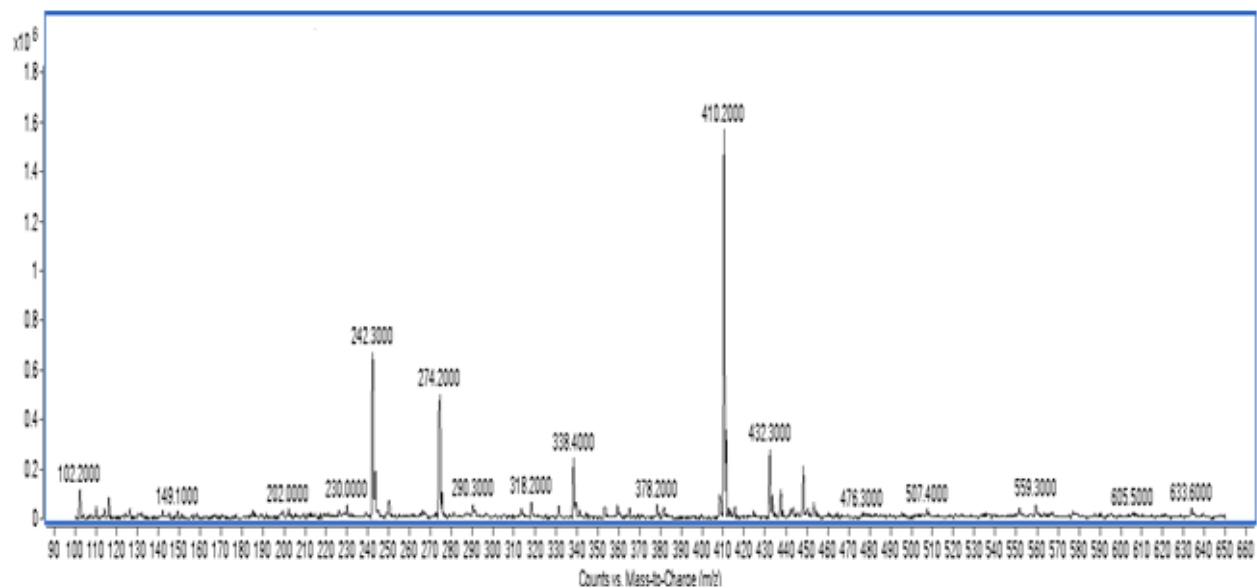

Mass:  $[\text{M}+\text{H}]^+ = m/z 410.2000$

**SI-Figure 45:** Mass spectrum of 3,5-Bis ((E)-3,4-dimethoxybenzylidene)-N-methyl-4-piperidone.

**Ip) 3,5-Bis ((E)-3,5-dichlorobenzylidene)-N-methyl-4-piperidone**

Yield: 75%. Yellow solid. Recrystallized from methanol-chloroform. mp: 186.3-188.6°C.  $^1\text{H}$  NMR (400 MHz,  $\text{CDCl}_3$ ):  $\delta$  7.58 (H-7, 2H, s),  $\delta$  7.30 (H-4', 2H, t,  $J = 1.44$  Hz),  $\delta$  7.158 (H-6', 2H, d,  $J = 0.416$  Hz),  $\delta$  7.155 (H-2', 2H, dd,  $J = 1.44$  and  $0.416$  Hz),  $\delta$  3.73 (H-2, H-6, 4H, s),  $\delta$  2.47, (N-CH<sub>3</sub>, 3H, s).  $^{13}\text{C}$  NMR (400 MHz,  $\text{CDCl}_3$ ):  $\delta$  185.75 (C-4),  $\delta$  137.83 (C-7),  $\delta$  135.32 (C-3' and 5'),  $\delta$  134.09 (C-3),  $\delta$  128.99 (C-4'),  $\delta$  128.19 (C-2'),  $\delta$  127.80 (C-1'),  $\delta$  56.42 (C-2 and C-6) and  $\delta$  45.57 (N-C); IR (KBr disc) ( $\text{cm}^{-1}$ ): 3070 ( $\text{sp}^2$  C-H), 2950 ( $\text{sp}^3$  C-H), 1675 (C=O), 1615 (C=C), 1590 and 1570 (aromatic skeletal stretch), 1095 (aromatic C-Cl), 1005 and 930 (C-H alkene out of plane bend), 870 and 675 (aromatic C-H out of plane bend); Mass:  $[\text{M}+\text{H}]^+ = m/z$  426.0000,  $[\text{M}-\text{HCl}]^+ = m/z$  318.1000; UV (MeOH)  $\lambda_{\text{max}}$  (nm): 311 and 250 nm.

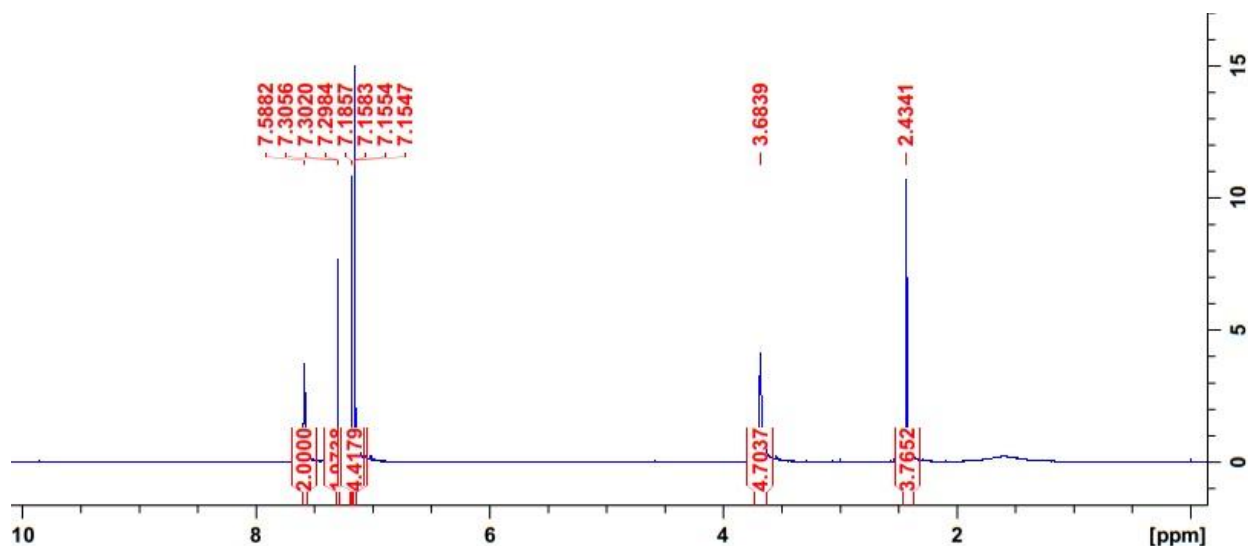

**SI-Figure 46:**  $^1\text{H}$  NMR spectrum of 3,5-Bis ((E)-3,5-dichlorobenzylidene)-N-methyl-4-piperidone.



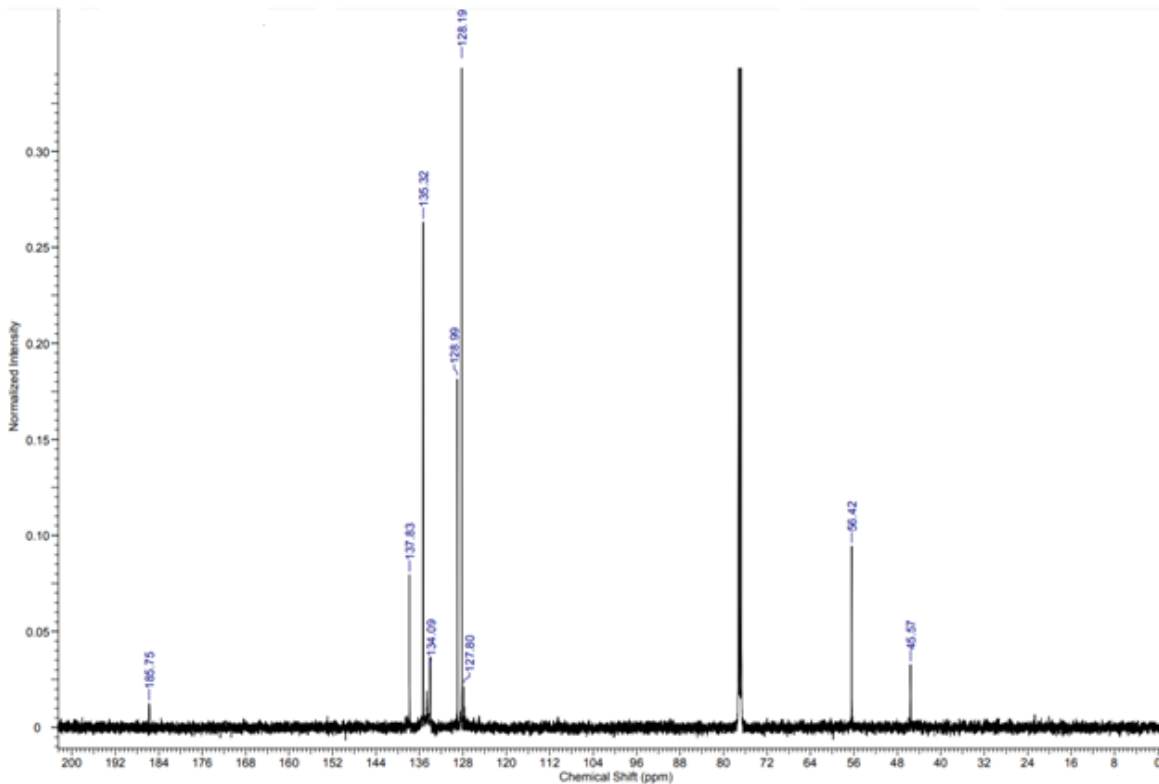

SI-Figure 47: <sup>13</sup>C NMR spectrum of 3,5-Bis ((E)-3,5-dichlorobenzylidene)-N-methyl-4-piperidone.

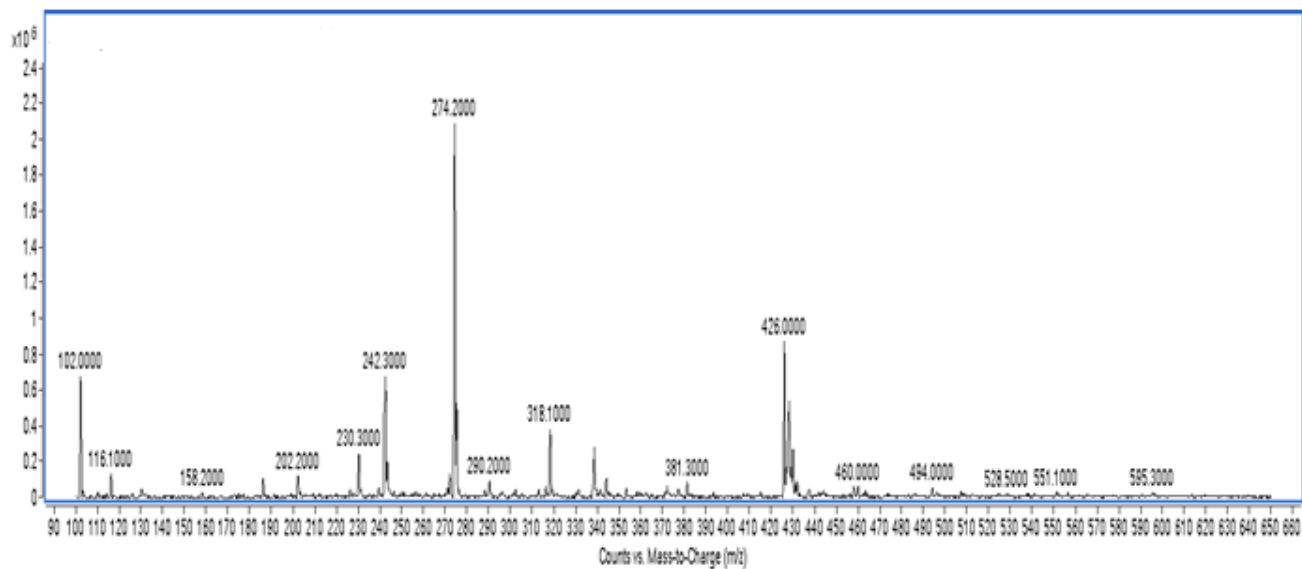

Mass:  $[M+H]^+ = m/z 426.0000$

SI-Figure 48: Mass spectrum of 3,5-Bis ((E)-3,5-dichlorobenzylidene)-N-methyl-4-piperidone.

### Iq) 3,5-Bis ((E) 4-nitrobenzylidene)-N-methyl-4-piperidone

Yield: 65%. Brown powder. Recrystallized from chloroform- methanol. mp: 230.5-231.2°C.  $^1\text{H}$  NMR (400 MHz,  $\text{CDCl}_3$ ) :  $\delta$  8.29 (H-3' and H-5', 4H, d,  $J = 8.72$  Hz),  $\delta$  7.82 (H-7, 2H, s),  $\delta$  7.55 (H-2' and H-6', 4H, d,  $J = 8.72$  Hz),  $\delta$  3.76 (H-2, H-6, 4H, s),  $\delta$  2.48 (N-CH<sub>3</sub>, 3H, s).  $^{13}\text{C}$  NMR (400 MHz,  $\text{CDCl}_3$ ):  $\delta$  185.9 (C-4),  $\delta$  147.63 (C-4'),  $\delta$  141.3 (C-5),  $\delta$  135.63 (C-7),  $\delta$  134.15 (C-1'),  $\delta$  130.85 (C-3' and C-5'),  $\delta$  123.87 (C-2' and C-6'),  $\delta$  56 (C-6) and  $\delta$  45 (N-C). Mass:  $[\text{M}+\text{H}]^+ = m/z$  380.1000; UV (MeOH)  $\lambda_{\text{max}}$  (nm): 331 and 272; IR (KBr disc) ( $\text{cm}^{-1}$ ): 3070 ( $\text{sp}^2$  C-H), 2928 ( $\text{sp}^3$  C-H), 1670 (C=O), 1612 (C=C), 1592 (aromatic skeletal stretch), 1540 and 1350 ( $\text{NO}_2$  stretch), 932 (C-H alkene out of plane bend), 895, 800 and 750 (aromatic C-H out of plane bend).

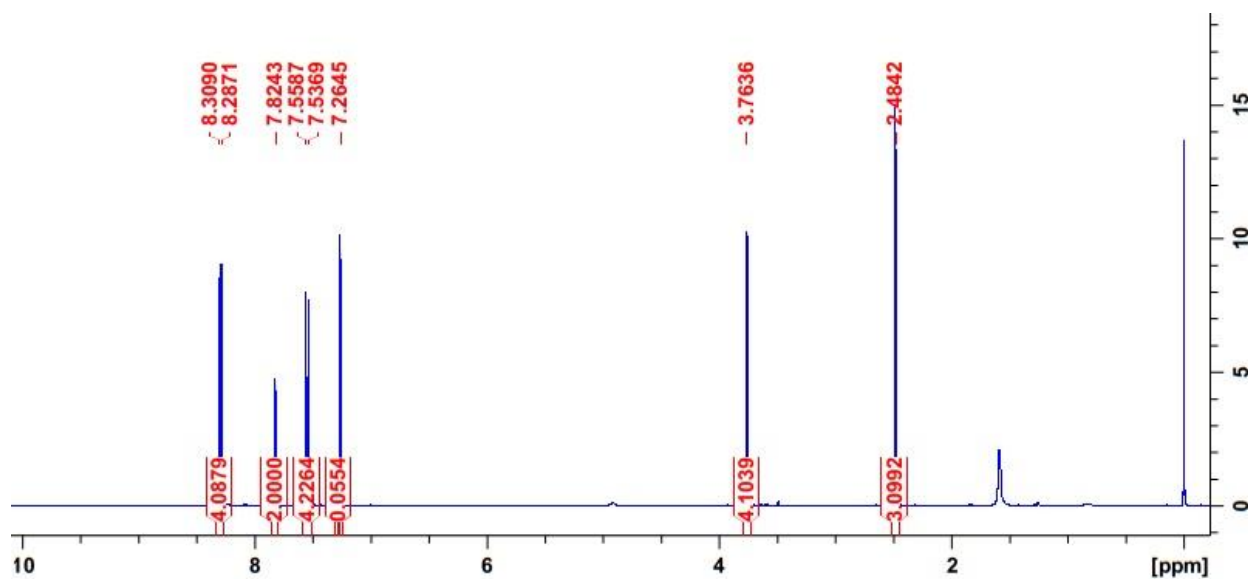

SI-Figure 49:  $^1\text{H}$  NMR spectrum of 3,5-Bis ((E) 4-nitrobenzylidene)-N-methyl-4-piperidone.

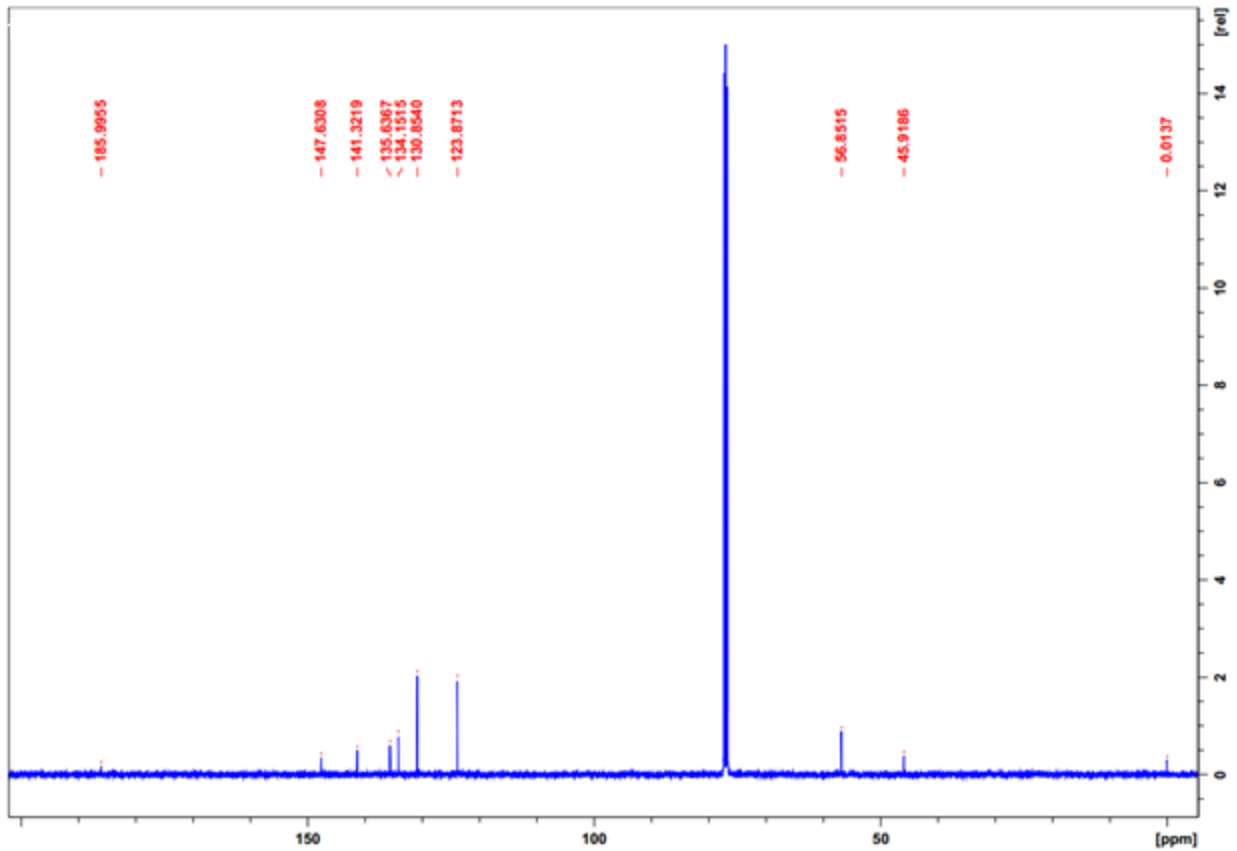

SI-Figure 50: <sup>13</sup>C NMR spectrum of 3,5-Bis ((E) 4-nitrobenzylidene)-N-methyl-4-piperidone.

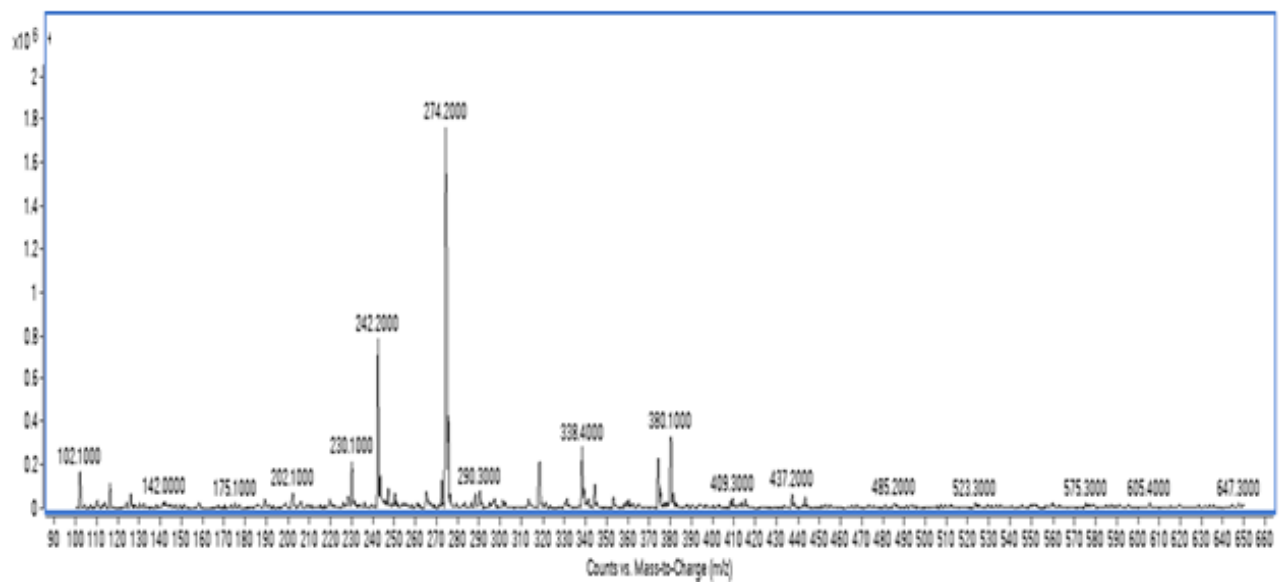

Mass: [M+H]<sup>+</sup> = m/z 380.1000

SI-Figure 51: Mass spectrum of 3,5-Bis ((E) 4-nitrobenzylidene)-N-methyl-4-piperidone.

### Ir) 3,5-Bis ((E) 3-hydroxybenzylidene)-N-methyl-4-piperidone

Yield: 83.8%. Light yellow powder. Chloroform and methanol were recrystallization solvents. mp: 284-286°C. <sup>1</sup>H NMR (400 MHz, CD<sub>3</sub>OH) : δ 9.55 (O-H) δ 7.8 (H-7, 2H, s), δ 7.33 (H-5', 2H, t, J = 7.88 Hz), δ 6.95-6.87 (H-2', H-4', H-6', 6H, overlapping signals), δ 3.30 (H-2, H-6, 4H,s), δ 3.07 (N-CH<sub>3</sub>, 3H, s). <sup>13</sup>C NMR (400 MHz, CD<sub>3</sub>OH) : δ 180.77 (C-4), δ 157.1 (C-3'), δ 139.20 (C-5), δ 133.99 (C-5'), δ 129.36 (C-7), δ 126.17 (C-1'), δ 120.97 (C-6'), δ 116.5 (C-2'), δ 116.8 (C-4'), δ 52.52 (C-6) and δ 41.4 (N-C); IR (KBr disc) (cm<sup>-1</sup>): 3600-3200 (O-H), 3050 (sp<sup>2</sup> C-H), 2980 (sp<sup>3</sup> C-H), 1680 (C=O), 1610 (C=C), 1580 and 1480 (aromatic skeletal stretch), 1225 (C-O), 1005 and 995 (C-H alkene out of plane bend), 850 and 780 (aromatic C-H out of plane bend); Mass: [M+H]<sup>+</sup> = m/z 321.9000; UV (MeOH) λ<sub>max</sub> (nm): 328 and 262 nm.

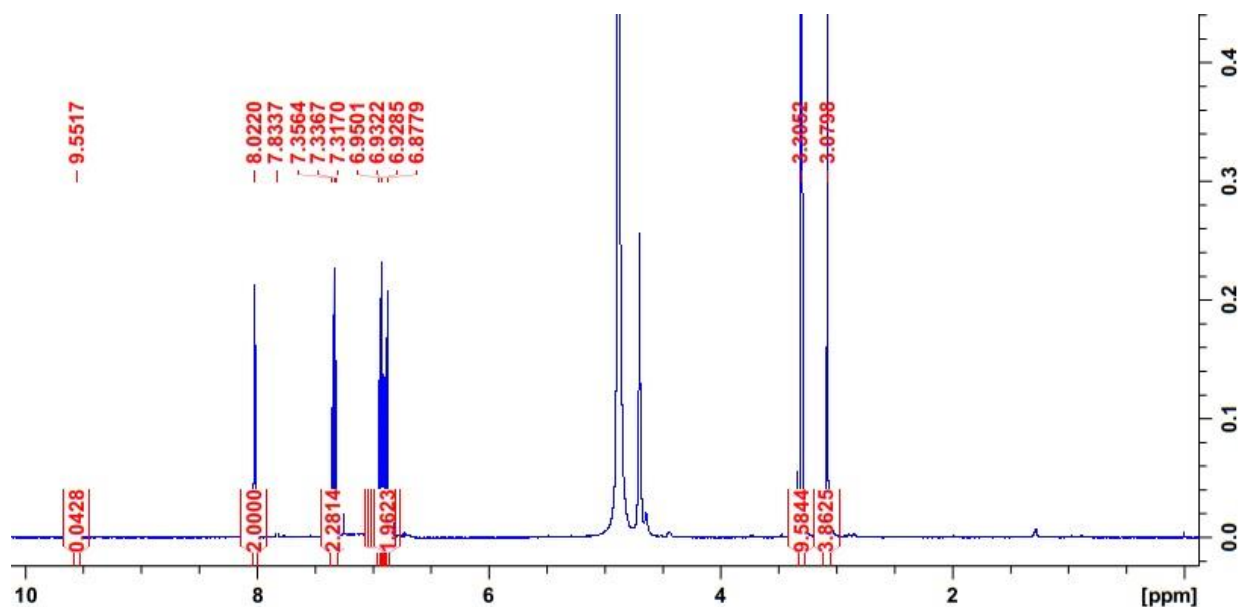

SI-Figure 52: <sup>1</sup>H NMR spectrum of 3,5-Bis ((E) 3-hydroxybenzylidene)-N-methyl-4-piperidone.

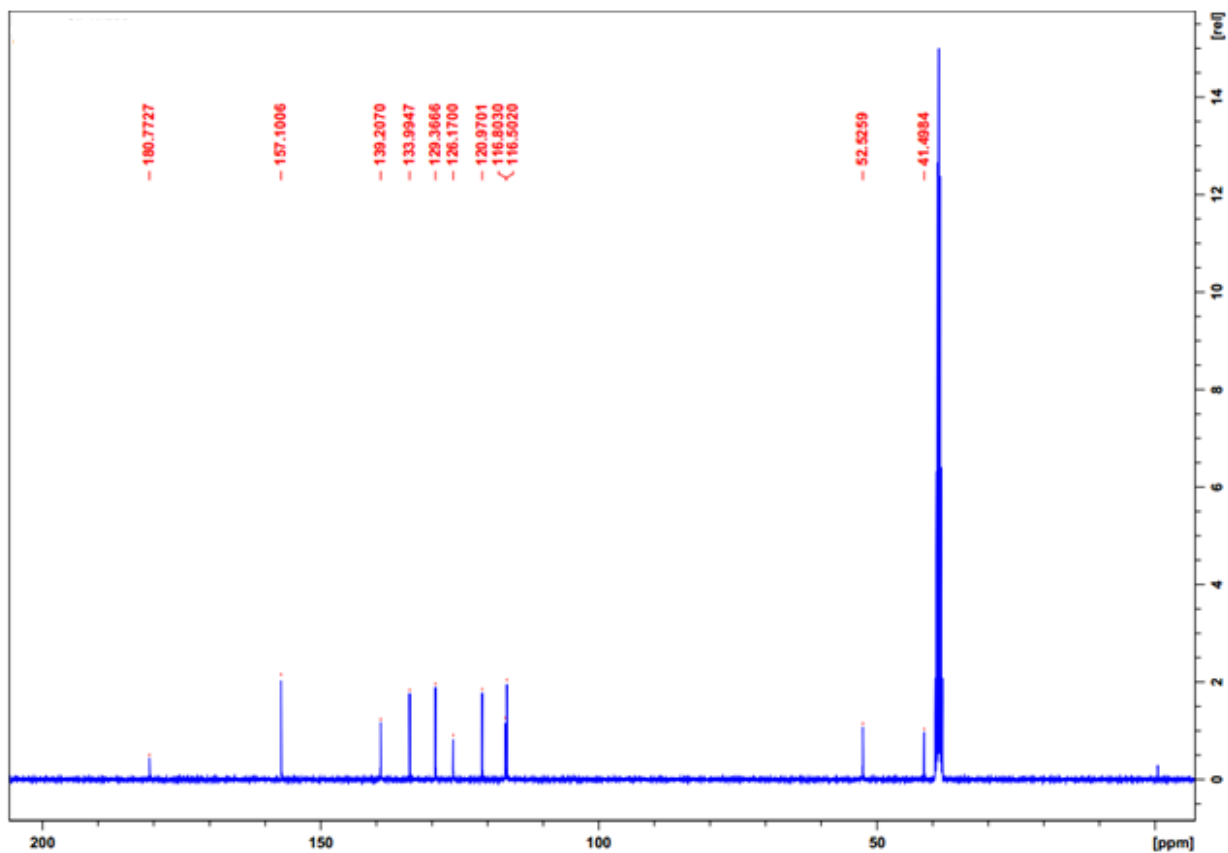

SI-Figure 53:  $^{13}\text{C}$  NMR spectrum of 3,5-Bis ((E) 3-hydroxybenzylidene)-N-methyl-4-piperidone.

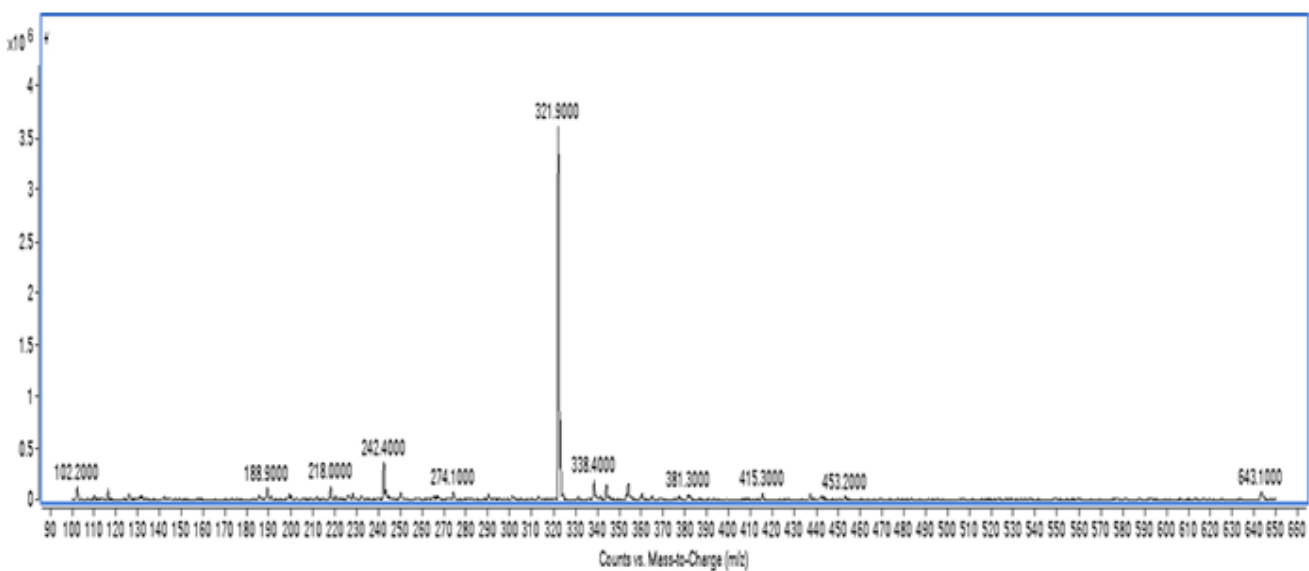

Mass:  $[\text{M}+\text{H}]^+ = m/z$  321.9000

SI-Figure 54: Mass spectrum of 3,5-Bis ((E) 3-hydroxybenzylidene)-N-methyl-4-piperidone.

**Is) 3,5-Bis ((E) 4-hydroxybenzylidene)-N-methyl-4-piperidone**

Yield: 84%. Orange powder. Recrystallized from chloroform-methanol. mp: 230.5-231.2°C. <sup>1</sup>H NMR (400 MHz, DMSO-d<sub>6</sub>): δ 10.09 (O-H) δ 7.55 (H-7, 2H, s), δ 7.36 (H-2', H-6', 4H, d, J = 8.6 Hz), δ 6.87 (H-3', H-5', 4H, d, J = 8.6 Hz), δ 3.33 (H-2, H-6, 4H, s), δ 2.50, (N-CH<sub>3</sub>, 3H, s). <sup>13</sup>C NMR (400 MHz, DMSO-d<sub>6</sub>): δ 184.7 (C-4), δ 158.26 (C-4'), δ 134.6 (C-5), δ 132.12 (C-2' and 6'), δ 129.20 (C-1'), δ 124.9 (C-7), δ 115.16 (C-3' and 5'), δ 55.6 (C-6) and δ 44.5 (N-C); IR (KBr disc) (cm<sup>-1</sup>): 3600-3200 (O-H stretch), 3050 (sp<sup>2</sup> C-H stretch), 2990 (sp<sup>3</sup> C-H stretch), 1650 (C=O stretch), 1588 and 1572(Ar skeletal bands), 764 and 693 (mono substituted aromatic ring); Mass: [M+H]<sup>+</sup> = m/z 322.1000; UV (MeOH) λ<sub>max</sub> (nm): 373 and 244.

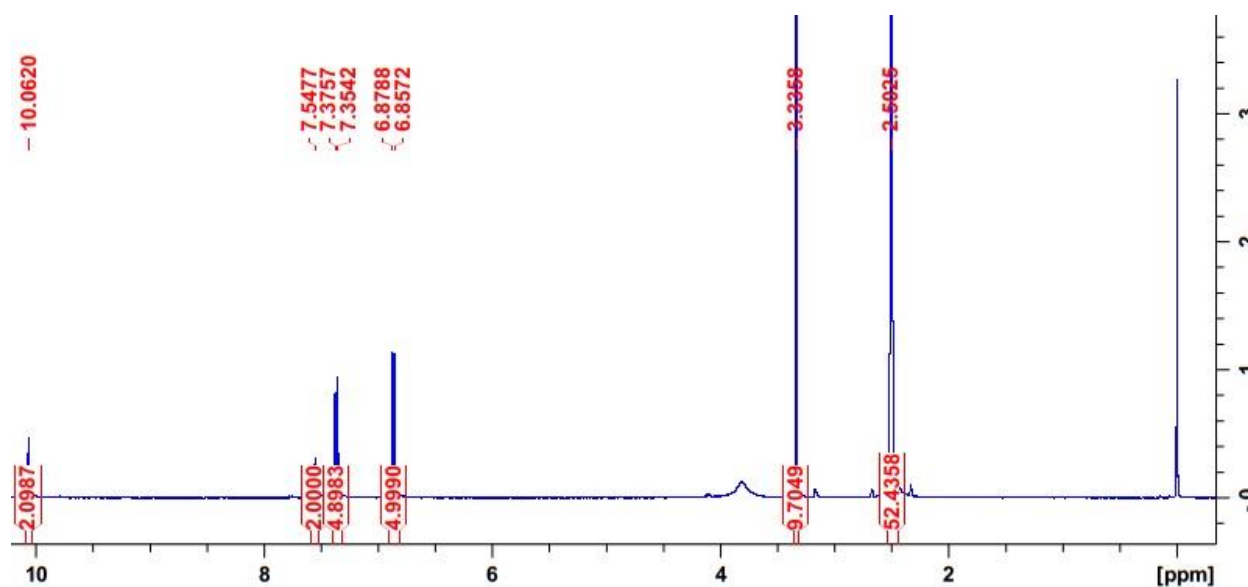

**SI-Figure 55: <sup>1</sup>H NMR spectrum of 3,5-Bis ((E) 4-hydroxybenzylidene)-N-methyl-4-piperidone.**

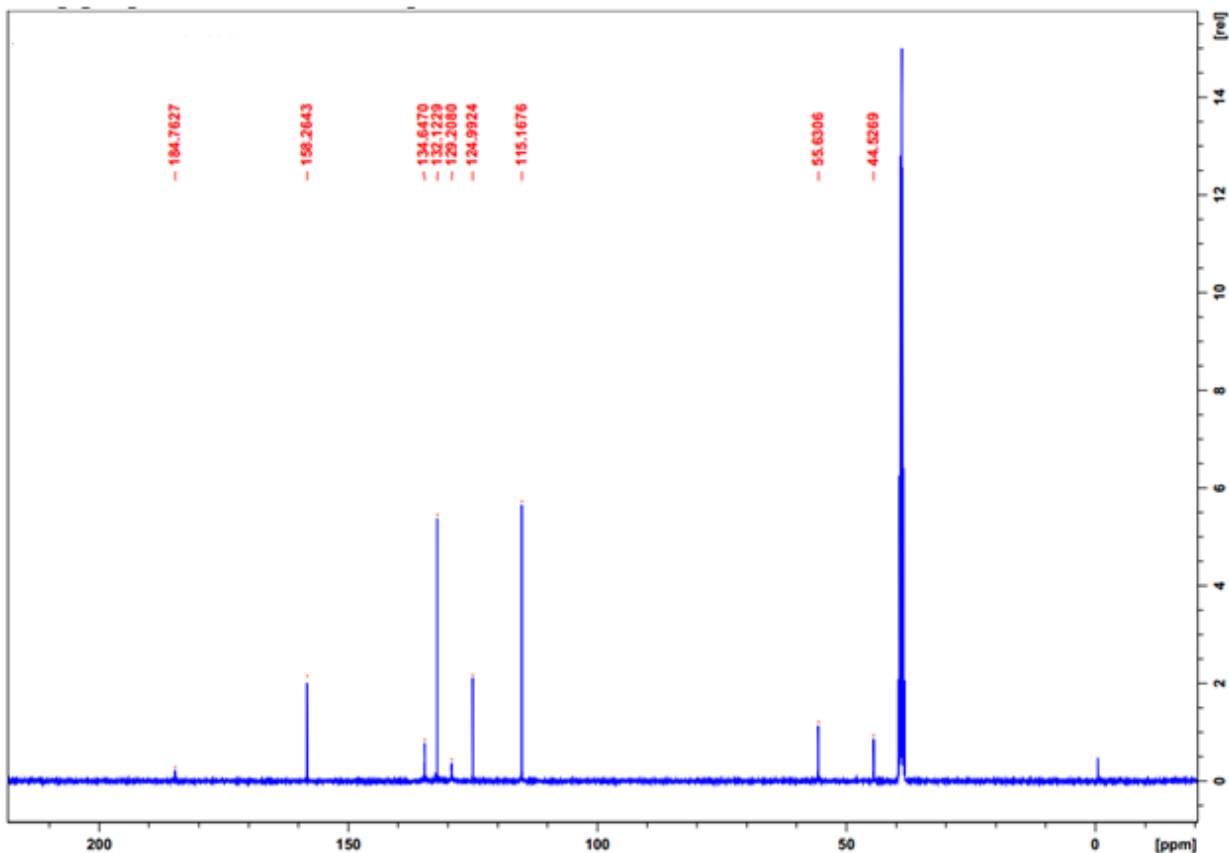

SI-Figure 56:  $^{13}\text{C}$  NMR spectrum of 3,5-Bis ((E) 4-hydroxybenzylidene)-N-methyl-4-piperidone.

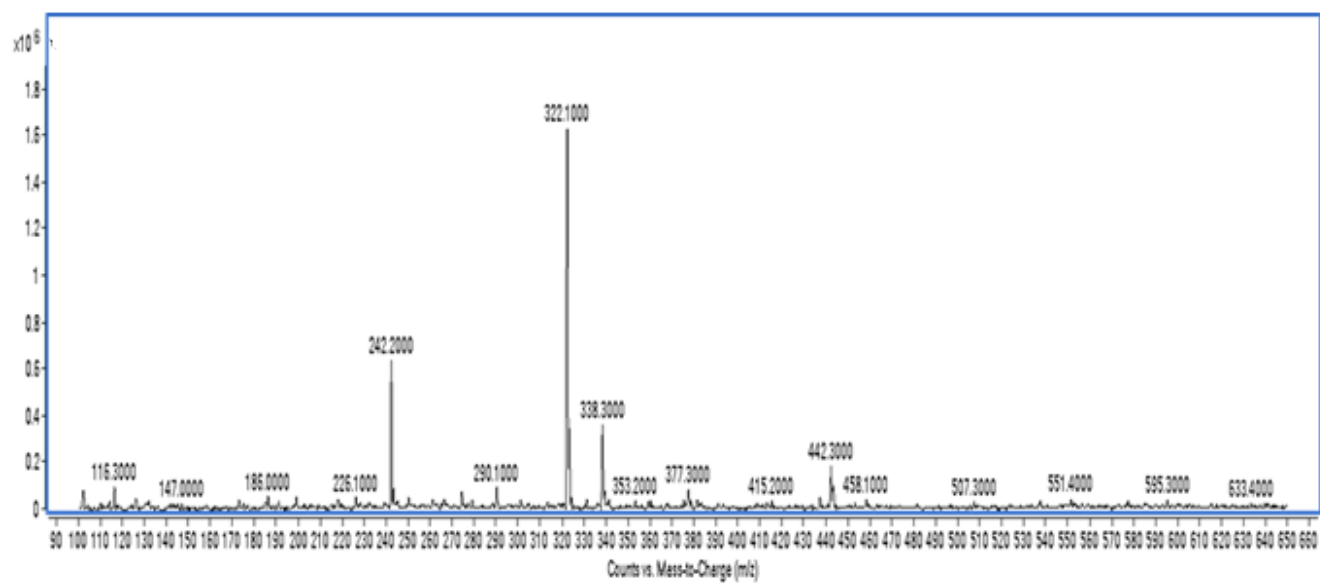

Mass:  $[\text{M}+\text{H}]^+ = m/z$  322.1000

SI-Figure 57: Mass spectrum of 3,5-Bis ((E) 4-hydroxybenzylidene)-N-methyl-4-piperidone.

**It) 3,5-Bis ((E) 4-hydroxy-3,5-dimethoxybenzylidene)-N-methyl-4-piperidone**

Yield: 67%. Obtained as red powder after recrystallization from methanol. mp: 237.2-238.4°C. <sup>1</sup>H NMR (400 MHz, DMSO-d<sub>6</sub>): δ 9.24 (O-H) δ 7.81 (H-7, 2H, s), δ 6.84 (H-2', H-6', 4H), δ 3.85 (O-CH<sub>3</sub>, 12H, s), δ 3.34 (H-2, H-6, 4H, s) δ 2.51, (N-CH<sub>3</sub>, 3H, s). <sup>13</sup>C NMR (400 MHz, DMSO-d<sub>6</sub>): δ 181.82 (C-4), δ 148.46 (C-3' and 5'), δ 140.24 (C-3), δ 138.98 (C-4'), δ 125.42 (C-1'), δ 124.44 (C-7), δ 109.76 (C-2' and 6'), δ 56.74 (O-CH<sub>3</sub>), δ 53.91 (C-2 and C-6) and δ 43.01 (N-C); IR (KBr disc) (cm<sup>-1</sup>): 3600-3200 (O-H), 3010 (sp<sup>2</sup> C-H), 2920 (sp<sup>3</sup> C-H), 1620 (C=O), 1600 (C=C), 1590 and 1570 (aromatic skeletal stretch), 1275 (C-O), 985 and 900 (C-H alkene out of plane bend), 820 and 790 (aromatic C-H out of plane bend). ); Mass: [M+H]<sup>+</sup> = m/z 442.2000; UV (MeOH) λ<sub>max</sub> (nm): 403 and 259 nm.

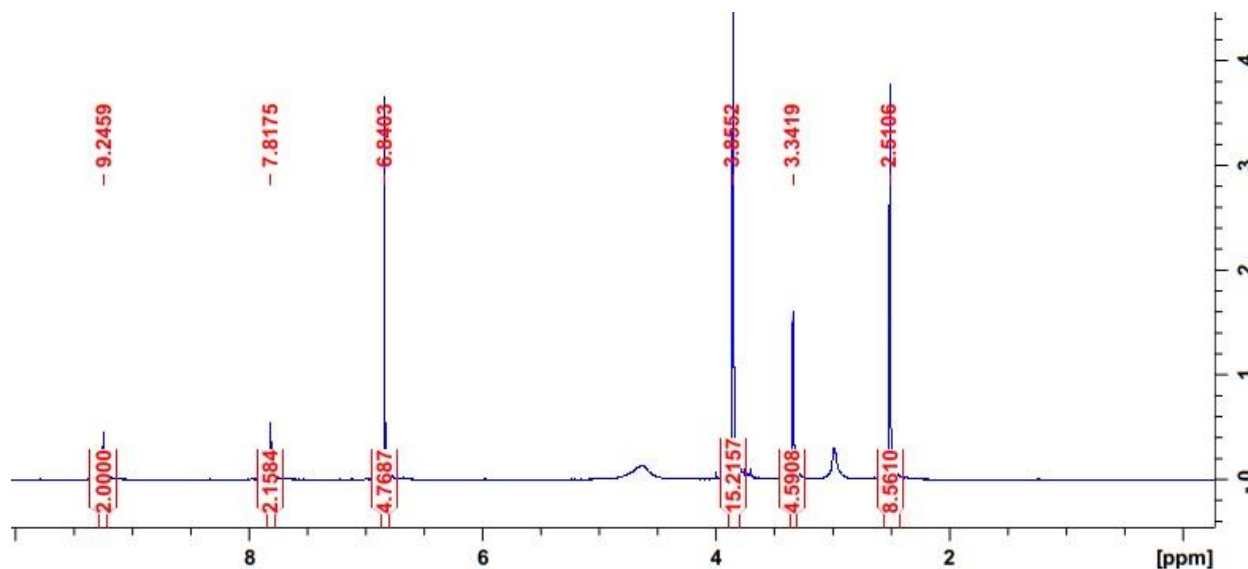

**SI-Figure 58: <sup>1</sup>H NMR spectrum of 3,5-Bis ((E) 4-hydroxy-3,5-dimethoxybenzylidene)-N-methyl-4-piperidone.**



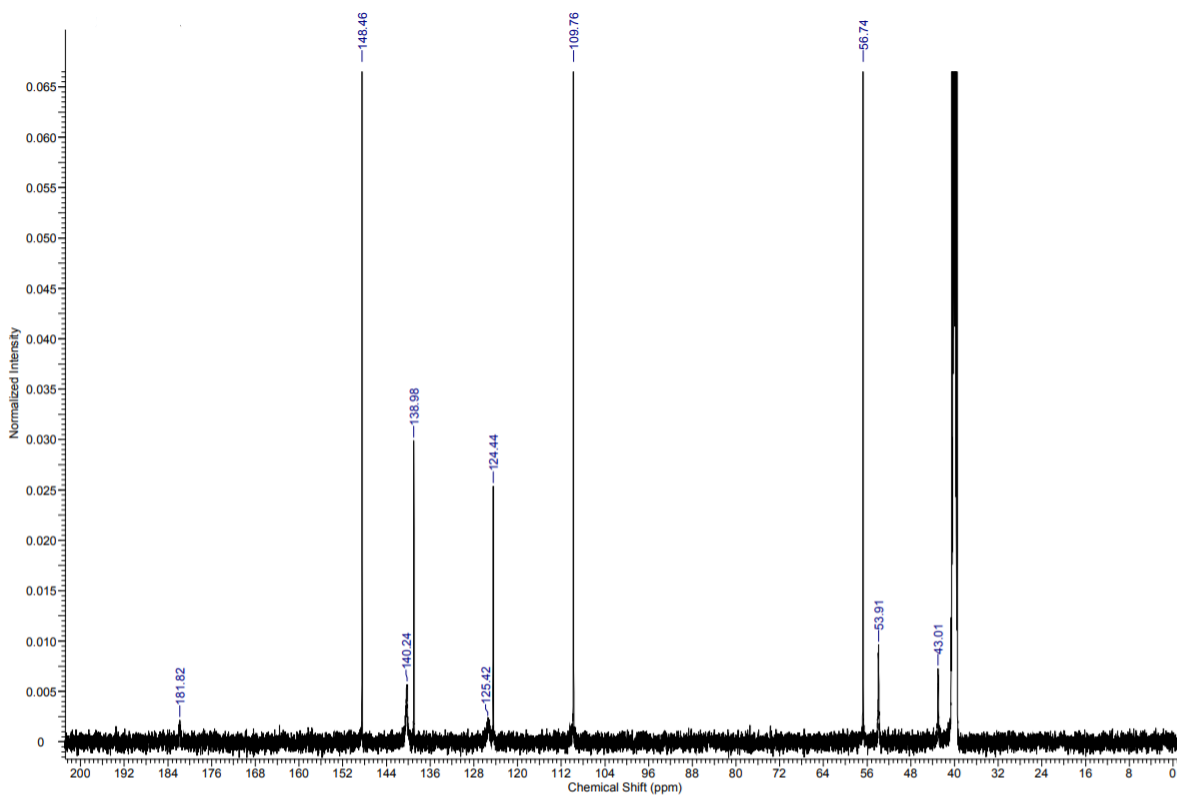

SI-Figure 59: <sup>13</sup>C NMR spectrum of 3,5-Bis ((E) 4-hydroxy-3,5-dimethoxybenzylidene)-N-methyl-4-piperidone.

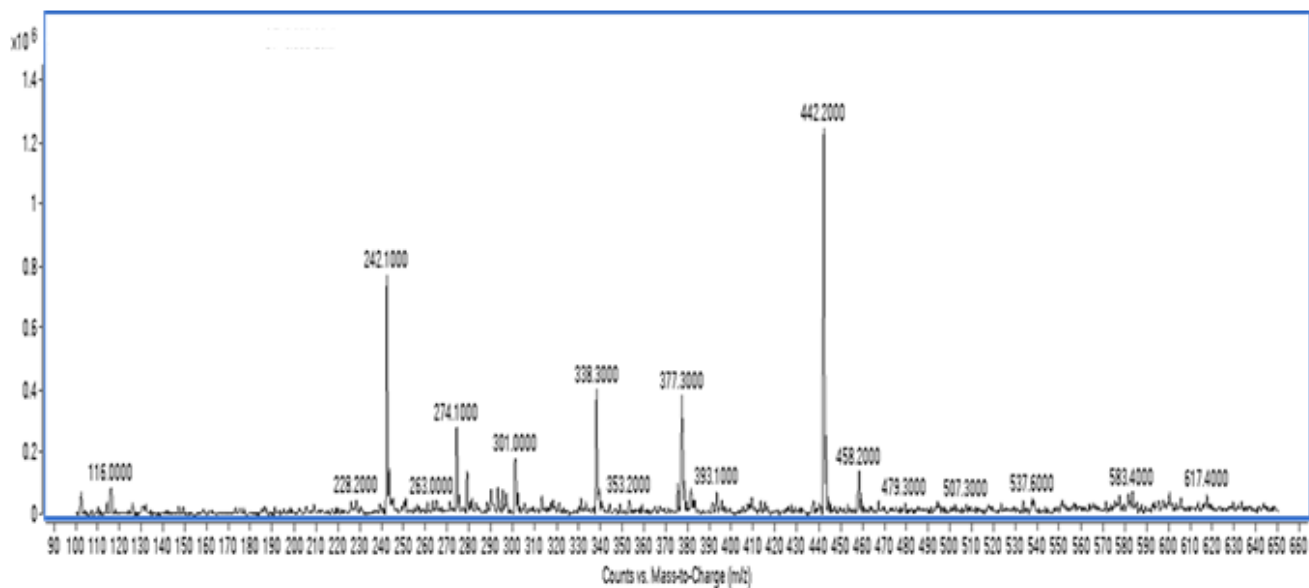

Mass: [M+H]<sup>+</sup> = m/z 442.2000

SI-Figure 60: Mass spectrum of 3,5-Bis ((E) 4-hydroxy-3,5-dimethoxybenzylidene)-N-methyl-4-piperidone.

### Iu) 3,5-Bis ((E) 4-hydroxy-3-methoxybenzylidene)-N-methyl-4-piperidone

Yield: 30%. The compound after recrystallizing in methanol was obtained as dark green powder. mp: 217-220.5°C. <sup>1</sup>H NMR (400 MHz, DMSO-d<sub>6</sub>): δ 9.69 (O-H) δ 7.60 (H-7, 2H, s), δ 7.08 (H-2', 2H), δ 6.97 (H-6', 2H, d, J = 6.04 Hz), δ 6.90 (H-5', 2H, d, J = 6.04 Hz), δ 3.83 (O-CH<sub>3</sub>, 12H), δ 3.34 (H-2, H-6, 4H, s), δ 2.50, (N-CH<sub>3</sub>, 3H, s). <sup>13</sup>C NMR (400 MHz, DMSO-d<sub>6</sub>): δ 185.39 (C-4), δ 148.95 (C-4'), δ 148.09 (C-3'), δ 136.55 (C-3), δ 129.76 (C-1'), δ 126.47 (C-7), δ 124.83 (C-6'), δ 116.24 (C-2'), δ 115.68 (C-5'), δ 56.20 (O-CH<sub>3</sub>), δ 49.07 (C-2 and C-6) and δ 45.27 (N-C); IR (KBr disc) (cm<sup>-1</sup>): 3600-3200 (O-H), 3020 (sp<sup>2</sup> C-H), 2980 (sp<sup>3</sup> C-H), 1680 (C=O), 1600 (C=C), 1510 (aromatic skeletal stretch), 1280 (C-O), 990 and 910 (C-H alkene out of plane bend), 830 and 795 (aromatic C-H out of plane bend); Mass: [M+H]<sup>+</sup> = m/z 382.1000; UV (MeOH) λ<sub>max</sub> (nm): 387, 265 and 257 nm.

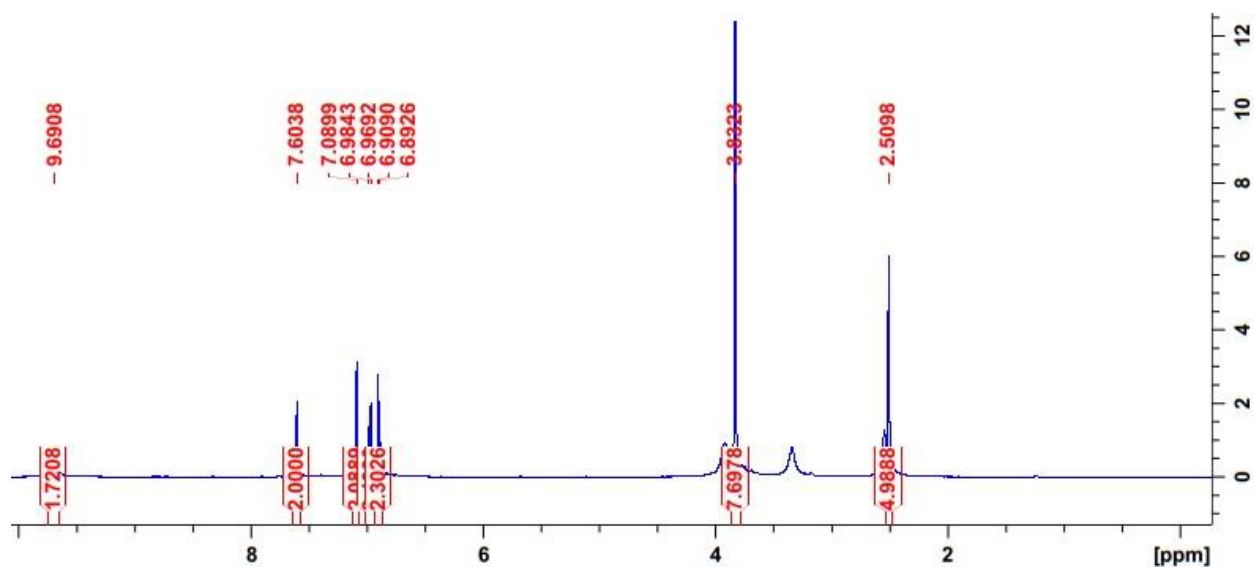

SI-Figure 61: <sup>1</sup>H NMR spectrum of 3,5-Bis ((E) 4-hydroxy-3-methoxybenzylidene)-N-methyl-4-piperidone.

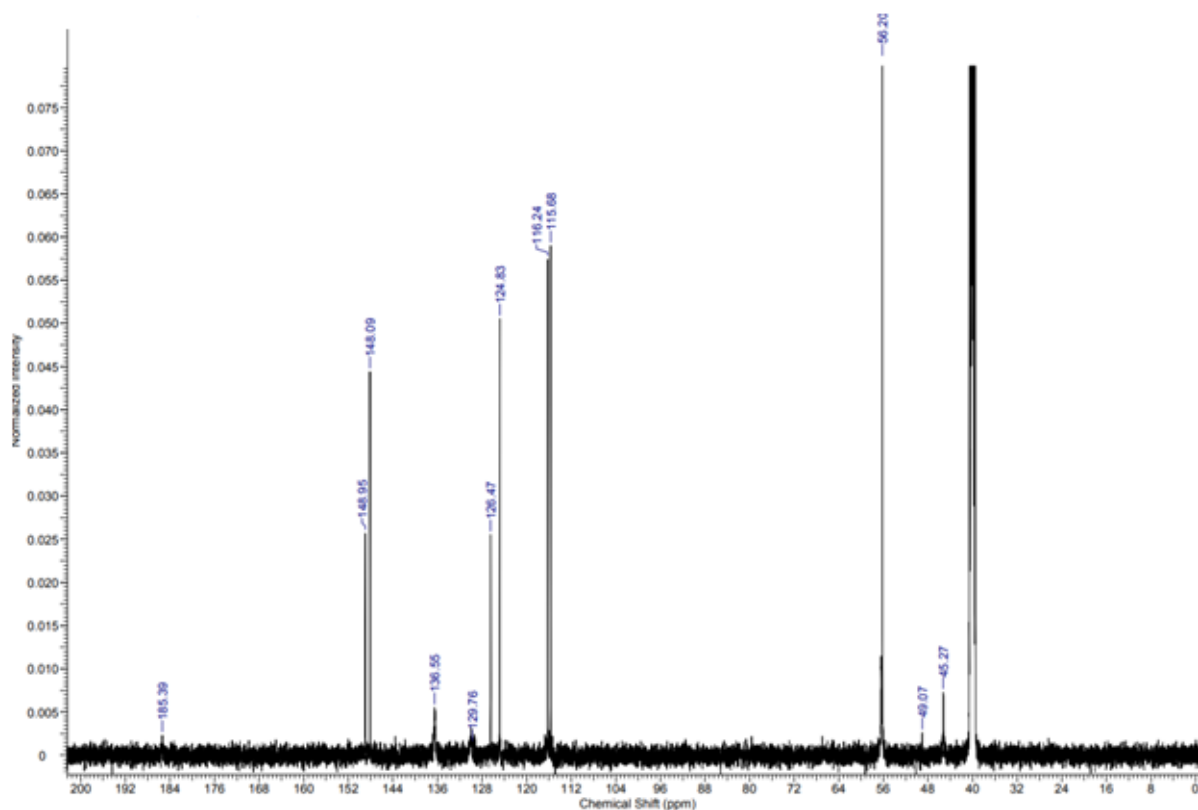

SI-Figure 62: <sup>13</sup>C NMR spectrum of 3,5-Bis ((E) 4-hydroxy-3-methoxybenzylidene)-N-methyl-4-piperidone.

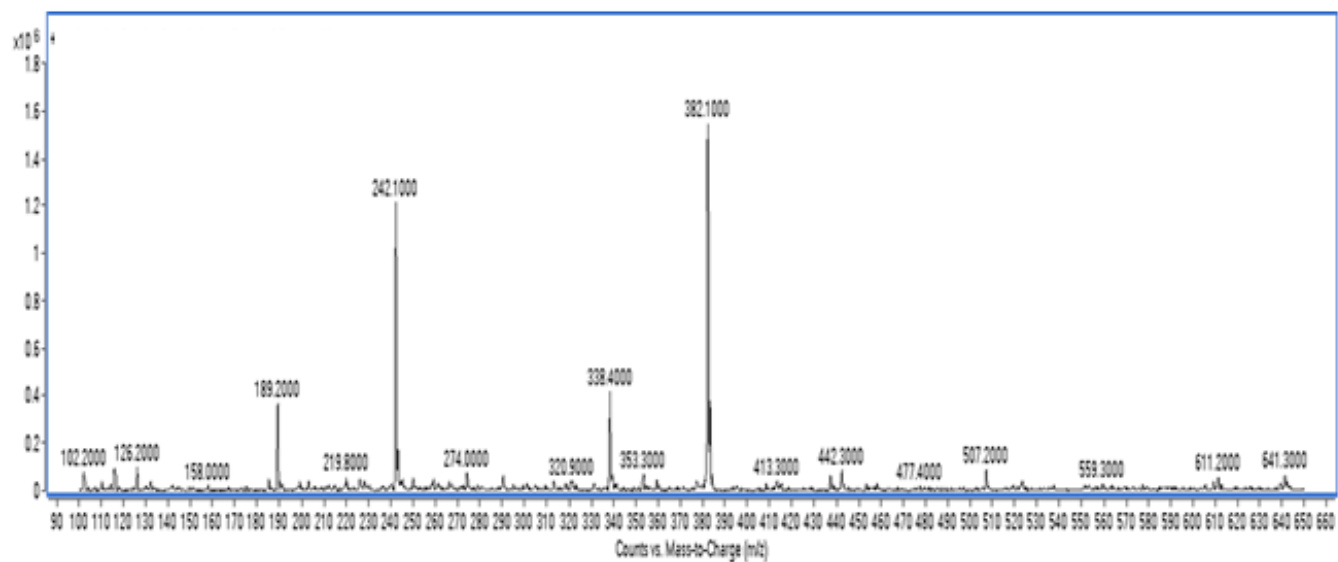

Mass: [M+H]<sup>+</sup> = m/z 382.1000

SI-Figure 63: Mass spectrum of 3,5-Bis ((E) 4-hydroxy-3-methoxybenzylidene)-N-methyl-4-piperidone.

## IIa) 3,5-Bis ((E)-2-thiophenebenzylidene)-N-methyl-4-piperidone

Yield: 81.5%. Light brown crystals. Recrystallized from methanol-chloroform. mp: 115-118.4°C;  $^1\text{H}$  NMR (400 MHz,  $\text{CDCl}_3$ ):  $\delta$  7.93 (H-7, 2H, s),  $\delta$  7.56 (H-5', 2H, d,  $J = 3.6$  Hz),  $\delta$  7.34 (H-3', 2H, d,  $J = 5.04$  Hz),  $\delta$  7.15 (H-4', 2H, dd,  $J = 3.6$  and  $5.04$  Hz),  $\delta$  3.82 (H-2, H-6, 4H, s),  $\delta$  2.59, (N-CH<sub>3</sub>, 3H, s).  $^{13}\text{C}$  NMR (400 MHz,  $\text{CDCl}_3$ ):  $\delta$  186.17 (C-4),  $\delta$  138.72 (C-6),  $\delta$  133.13 (C-7),  $\delta$  130.48 (C-1'),  $\delta$  130.47 (C-2'),  $\delta$  128.36 (C-4'),  $\delta$  127.98 (C-3'),  $\delta$  56.71 (C-6) and  $\delta$  46.08 (N-C); IR (KBr disc) ( $\text{cm}^{-1}$ ): 3080 ( $\text{sp}^2$  C-H), 2968 ( $\text{sp}^3$  C-H), 1663 (C=O), 1575 and 1505 (aromatic skeletal stretch), 1604 (C=C), 732 and 652 (C-H); Mass:  $m/z$  301.7000,  $[\text{M}+2]^+ = m/z$  303,  $[\text{M}-123]^+ = m/z$  178.9000; UV (MeOH)  $\lambda_{\text{max}}$  (nm): 256 and 376 nm.

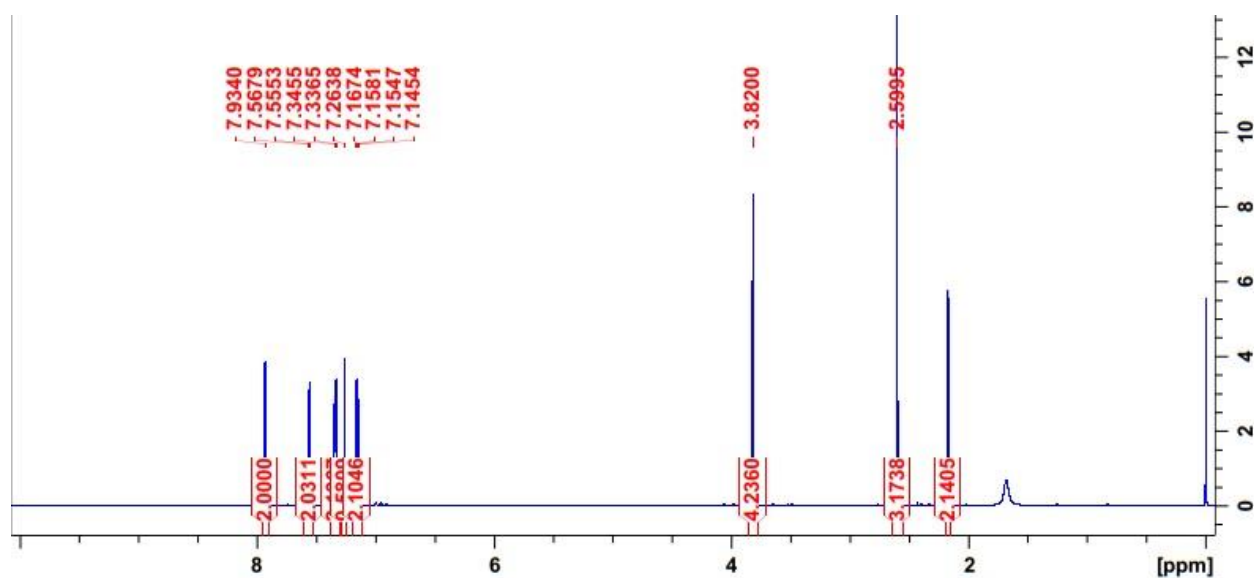

SI-Figure 64:  $^1\text{H}$  NMR spectrum of 3,5-Bis ((E)-2-thiophenebenzylidene)-N-methyl-4-piperidone.

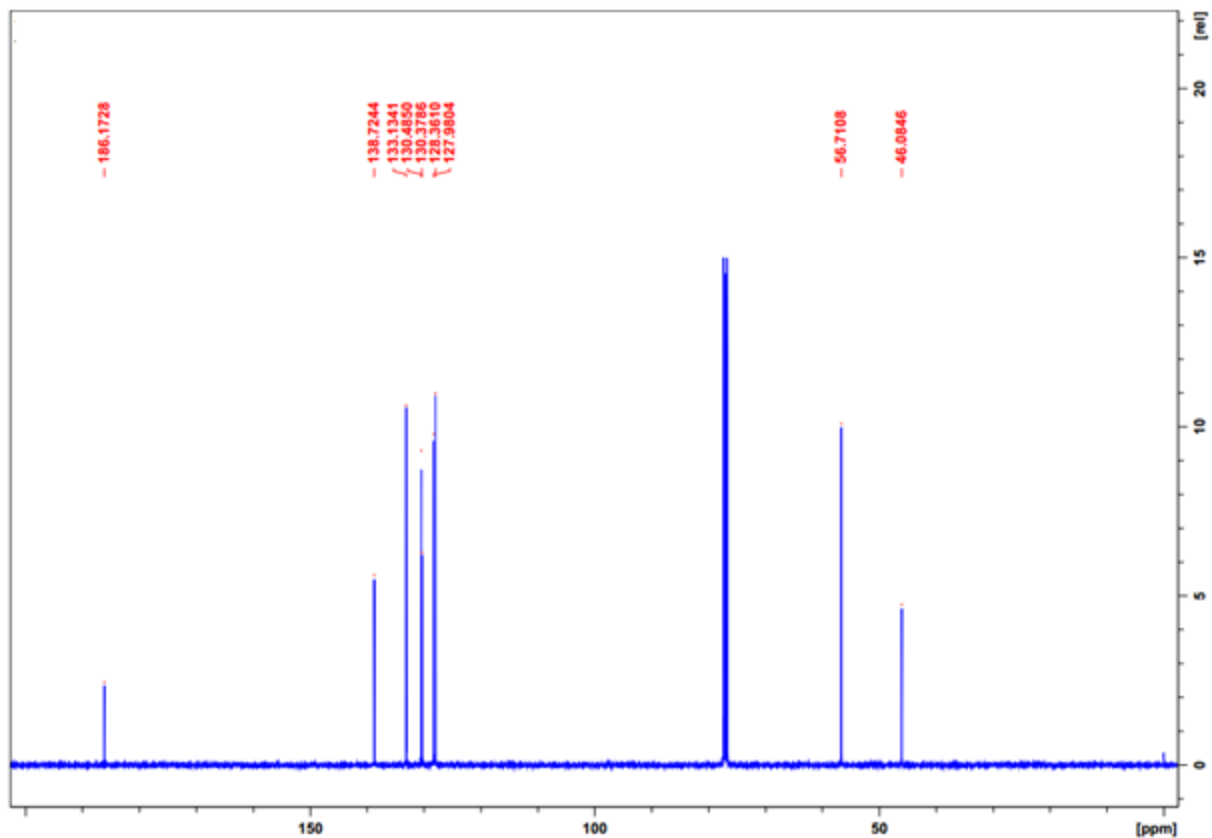

SI-Figure 65:  $^{13}\text{C}$  NMR spectrum of 3,5-Bis ((E)-2-thiophenebenzylidene)-N-methyl-4-piperidone.

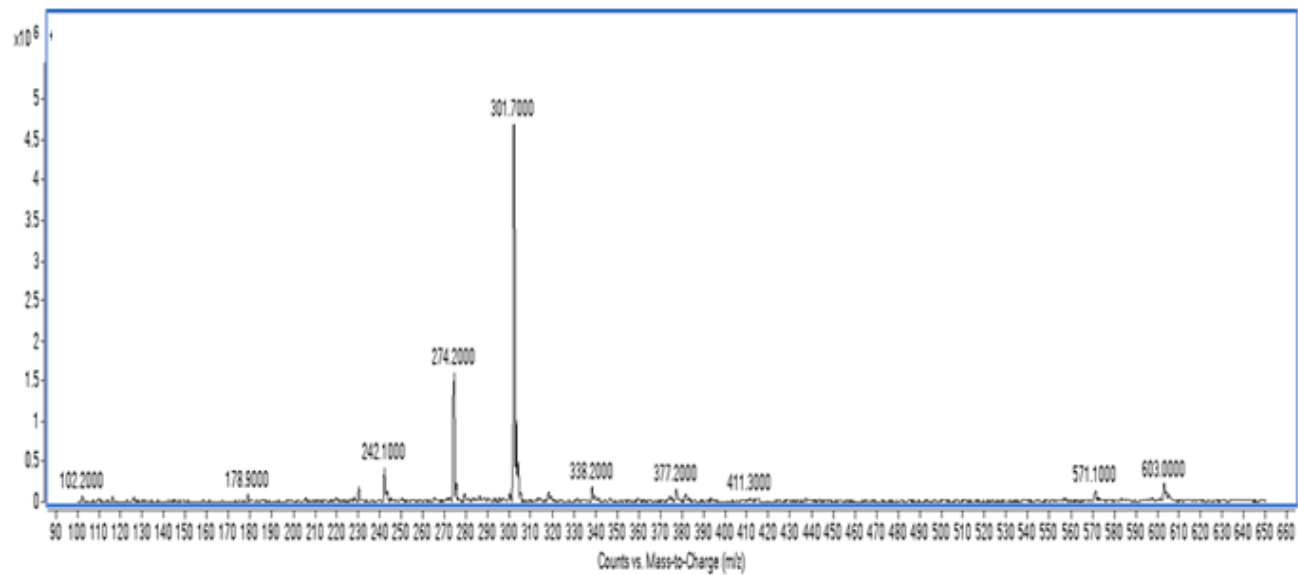

Mass: m/z 301.7000

SI-Figure 66: Mass spectrum of 3,5-Bis ((E)-2-thiophenebenzylidene)-N-methyl-4-piperidone.

### IIb) 3,5-Bis ((E) pyrrole-2-benzylidene)-N-methyl-4-piperidone

Yield: 58%. Red powder. Recrystallized from chloroform-methanol. mp: 214-215.4°C.  $^1\text{H}$  NMR (400 MHz, DMSO-d<sub>6</sub>):  $\delta$  7.52 (H-7, 2H, s),  $\delta$  7.09 (H-5', 2H, d),  $\delta$  6.43 (H-3', 2H, d),  $\delta$  6.28 (H-4', 2H, dd),  $\delta$  3.59 (H-2, H-6, 4H, s),  $\delta$  2.46, (N-CH<sub>3</sub>, 3H, s).  $^{13}\text{C}$  NMR (400 MHz, DMSO-d<sub>6</sub>):  $\delta$  183.99 (C-4),  $\delta$  127.59 (C-5),  $\delta$  126.50 (C-7),  $\delta$  123.56 (C-2'),  $\delta$  122.10 (C-5'),  $\delta$  113.04 (C-4'),  $\delta$  110.49 (C-3'),  $\delta$  55.80 (C-6) and  $\delta$  45.0 (N-C); IR (KBr disc) (cm<sup>-1</sup>): 2995 (sp<sup>2</sup> C-H), 2950 (sp<sup>3</sup> C-H), 1635 (C=O), 1600 (C=C), 1550 (aromatic skeletal stretch), 1300 (C-N), 1000 and 920 (C-H alkene out of plane bend), 880 and 720 (aromatic C-H out of plane bend); Mass: m/z 267.9000; UV (MeOH)  $\lambda_{\text{max}}$  (nm): 436 and 252 nm.

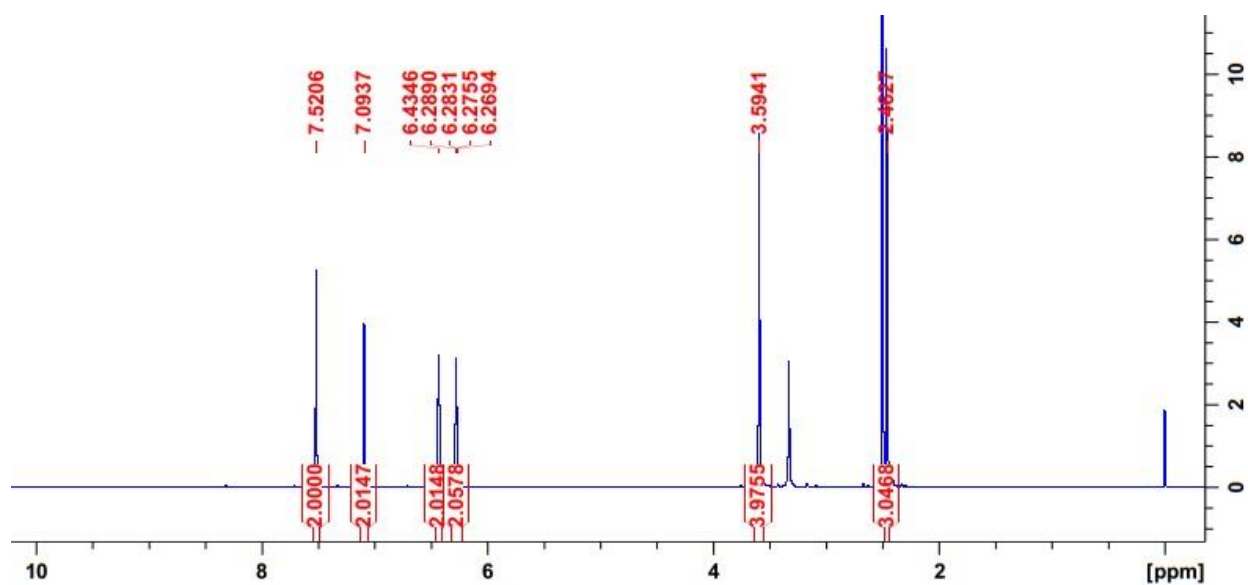

SI-Figure 67:  $^1\text{H}$  NMR spectrum of 3,5-Bis ((E) pyrrole-2-benzylidene)-N-methyl-4-piperidone.

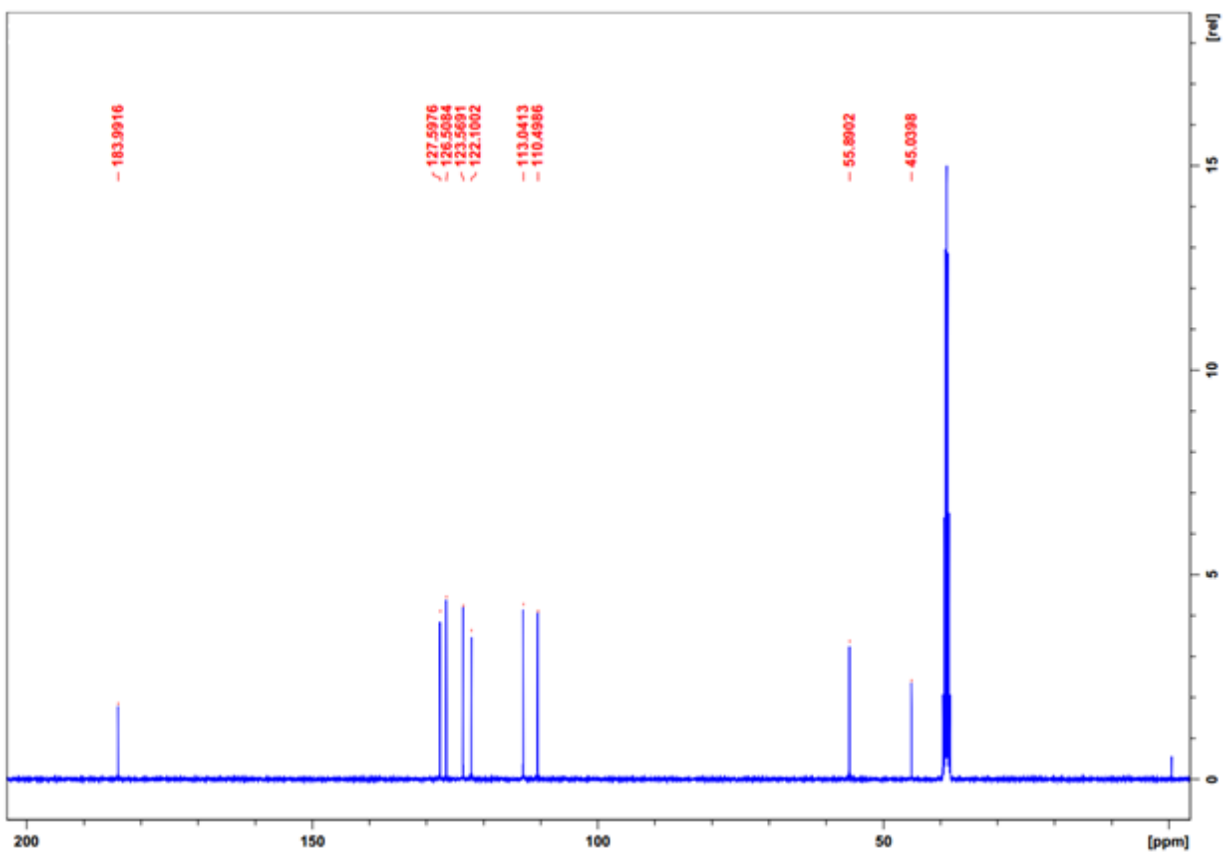

SI-Figure 68: <sup>13</sup>C NMR spectrum of 3,5-Bis ((E) pyrrole-2-benzylidene)-N-methyl-4-piperidone.

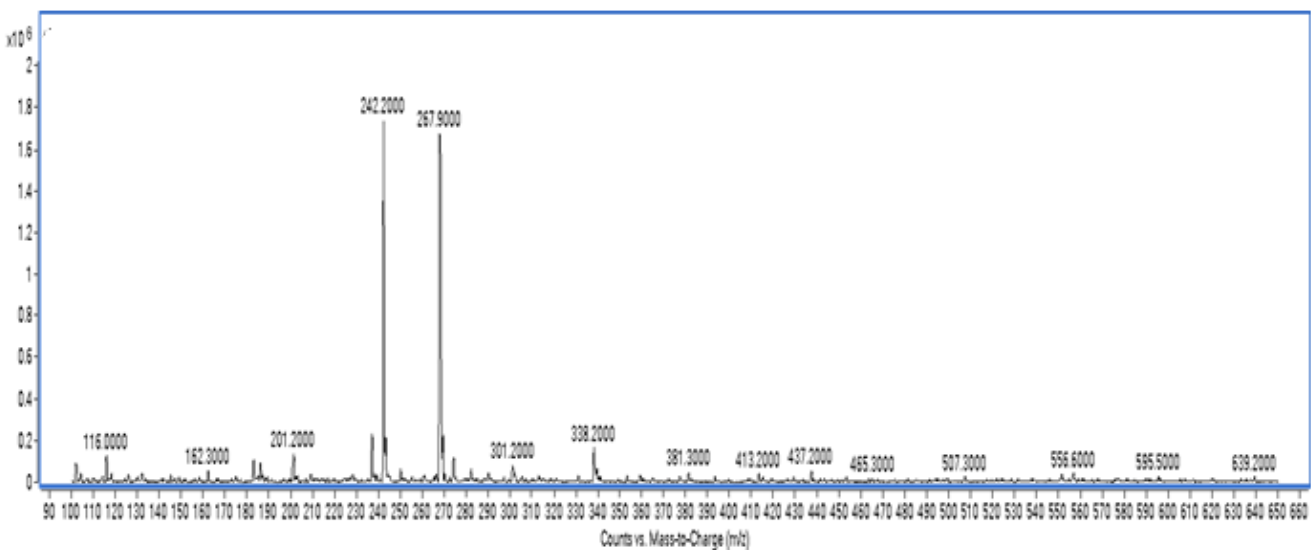

Mass: m/z 267.9000

SI-Figure 69: Mass spectrum of 3,5-Bis ((E) pyrrole-2-benzylidene)-N-methyl-4-piperidone.

### IIIa) 3,5-Bis ((E)-3-thiophenebenzylidene)-N-methyl-4-piperidone

Yield: 54%. Brown crystals. Recrystallized from methanol. mp: 125.8-127.8°C.  $^1\text{H}$  NMR (400 MHz,  $\text{CDCl}_3$ )  $\delta$  7.76 (H-7, 2H, s),  $\delta$  7.46 (H-2', 2H, d,  $J = 2.52$  Hz),  $\delta$  7.38 (H-5', 2H, dd,  $J = 2.52$  and 5 Hz),  $\delta$  7.22 (H-4', 2H, d,  $J = 5$  Hz),  $\delta$  3.79 (H-2, H-6, 4H, s),  $\delta$  2.53 (N-CH<sub>3</sub>, 3H, s).  $^{13}\text{C}$  NMR (400 MHz,  $\text{CDCl}_3$ ):  $\delta$  185.87 (C-4),  $\delta$  135.75 (C-5),  $\delta$  131.48 (C-7),  $\delta$  129.28 (C-3'),  $\delta$  128.80 (C-2'),  $\delta$  127.49 (C-4'),  $\delta$  126.45 (C-5'),  $\delta$  55.84 (C-6) and  $\delta$  44.8 (N-C); IR (KBr disc) ( $\text{cm}^{-1}$ ): 3095 ( $\text{sp}^2\text{C-H}$ ), 2970 ( $\text{sp}^3\text{C-H}$ ), 1675 (C=O), 1600 (C=C), 1515 and 1475 (aromatic skeletal stretch), 1000 and 940 (C-H alkene out of plane bend), 890 and 800 (aromatic C-H out of plane bend); Mass:  $[\text{M}+\text{H}]^+ = m/z$  301.8000; UV (MeOH)  $\lambda_{\text{max}}$  (nm): 354 and 212 nm.

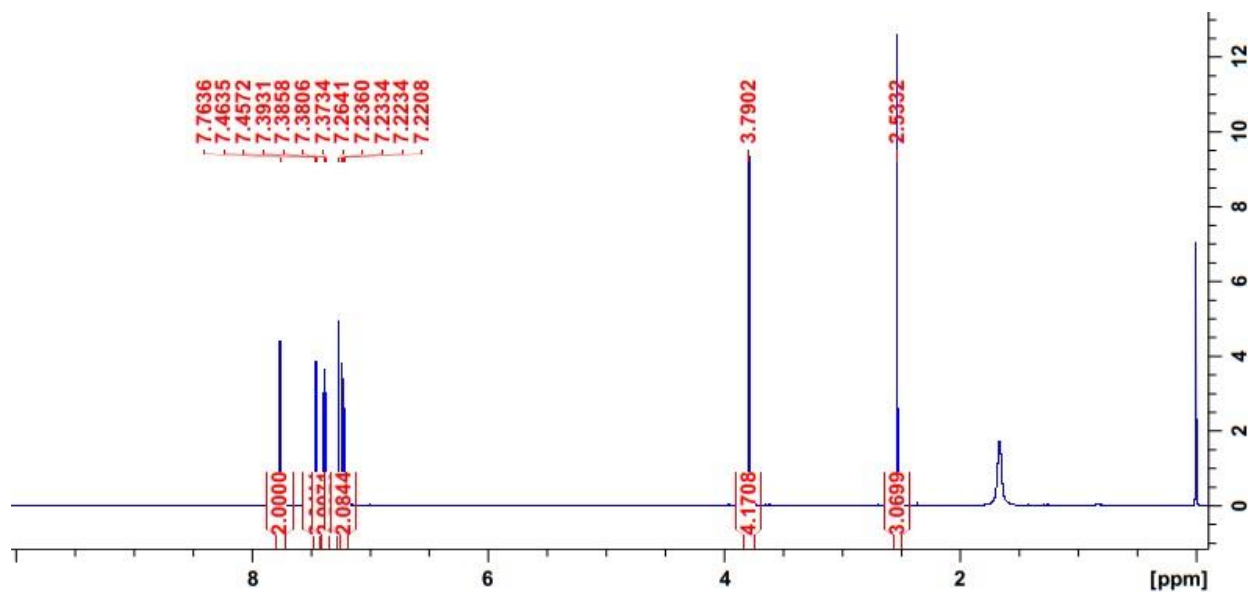

SI-Figure 70:  $^1\text{H}$  NMR spectrum of 3,5-Bis ((E)-3-thiophenebenzylidene)-N-methyl-4-piperidone.



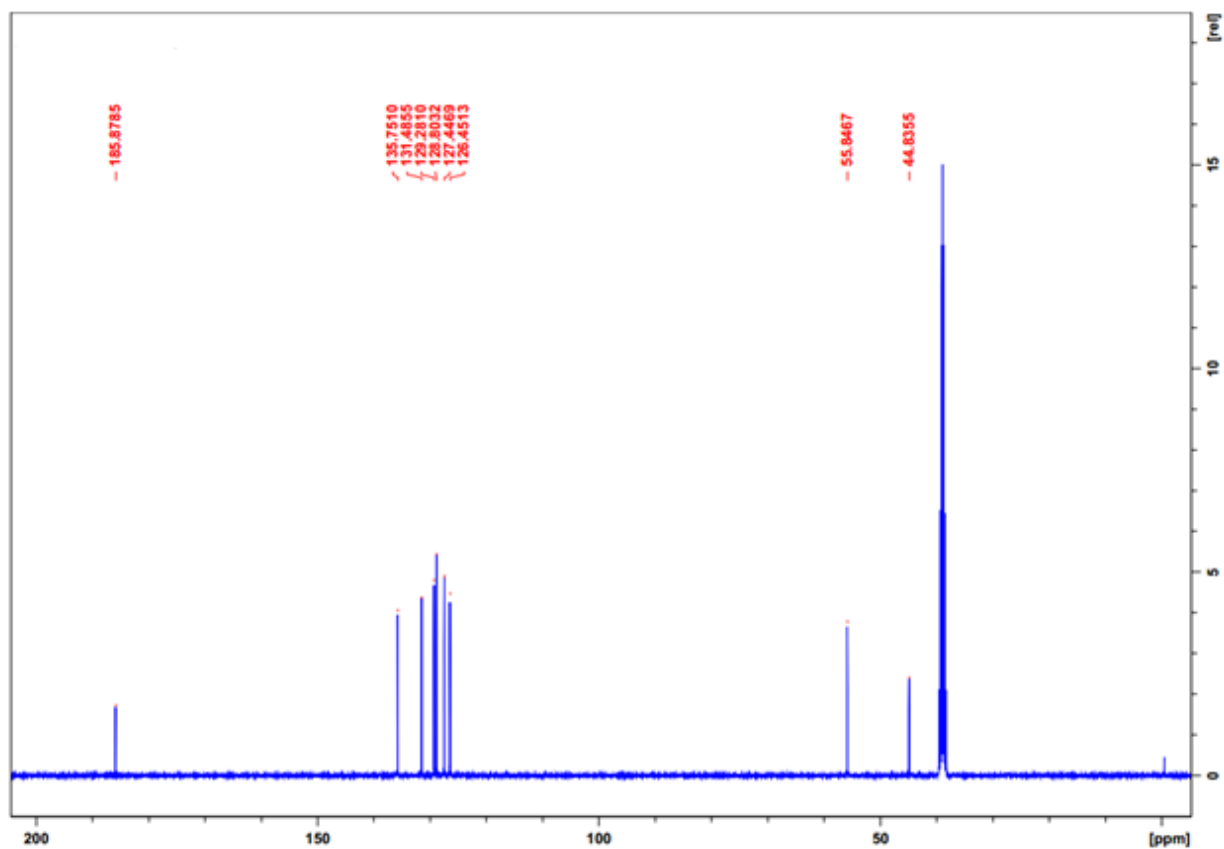

SI-Figure 71: <sup>13</sup>C NMR spectrum of 3,5-Bis ((E)-3-thiophenebenzylidene)-N-methyl-4-piperidone.

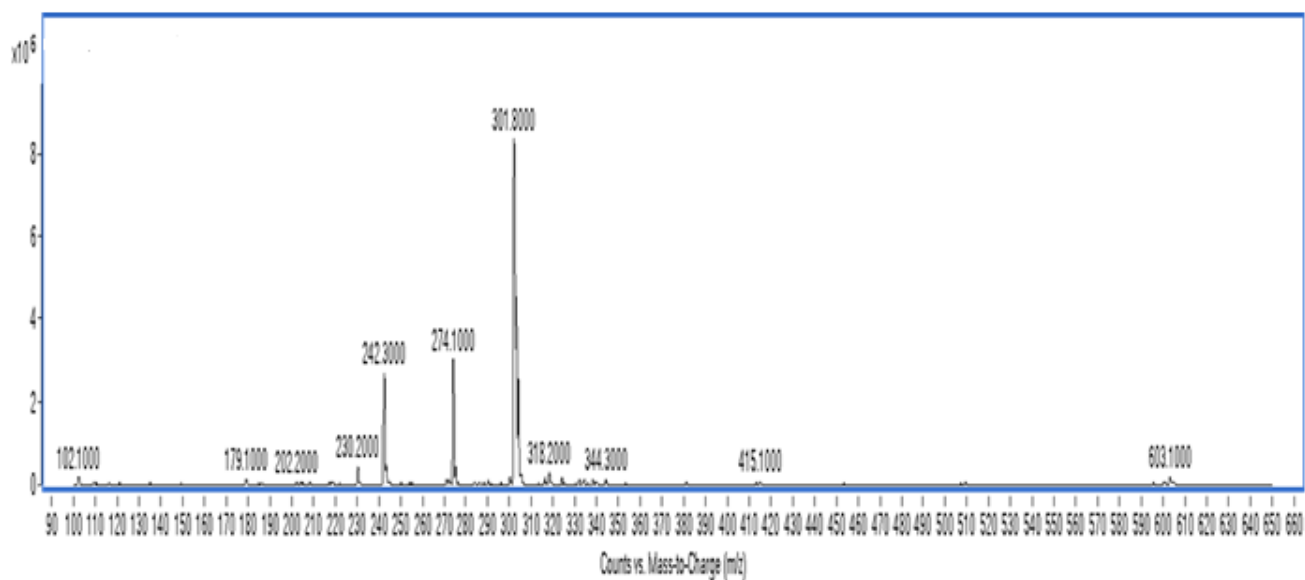

Mass: [M+H]<sup>+</sup> = m/z 301.8000

SI-Figure 72: Mass spectrum of 3,5-Bis ((E)-3-thiophenebenzylidene)-N-methyl-4-piperidone.

**IVa) 3,5-Bis ((E)-5-bromo-2-thiophene benzylidene)-N-methyl-4-piperidone**

Yield: 87.8%. Yellow crystals. Recrystallized from chloroform and methanol. mp: 204.8-207°C.  $^1\text{H}$  NMR (400 MHz,  $\text{CDCl}_3$ ):  $\delta$  7.81 (H-7, 2H, s),  $\delta$  7.07 (H-3', 2H, d,  $J = 3.12$  Hz),  $\delta$  7.04 (H-4', 2H, d,  $J = 3.12$  Hz),  $\delta$  3.88 (H-2, H-6, 4H, s),  $\delta$  2.61, (N- $\text{CH}_3$ , 3H, s).  $^{13}\text{C}$  NMR (400 MHz,  $\text{CDCl}_3$ ):  $\delta$  185.53 (C-4),  $\delta$  140.15 (C-7),  $\delta$  133.34 (C-3'),  $\delta$  130.92 (C-4'),  $\delta$  130.29 (C-3),  $\delta$  127.97 (C-2'),  $\delta$  118.23 (C-5'),  $\delta$  56.44 (C-2 and C-6) and  $\delta$  45.85 (N-C); IR (KBr disc) ( $\text{cm}^{-1}$ ): 3085 ( $\text{sp}^2$  C-H), 2960 ( $\text{sp}^3$  C-H), 1630 (C=O), 1600 (C=C), 1575 and 1498 (aromatic skeletal stretch), 1030 and 920 (C-H alkene out of plane bend), 800 and 720 (aromatic C-H out of plane bend); Mass:  $[\text{M}+\text{H}]^+ = m/z$  459.8000,  $[\text{M}+2]^+ = m/z$  461; UV (MeOH)  $\lambda_{\text{max}}$  (nm): 387 and 272 nm.

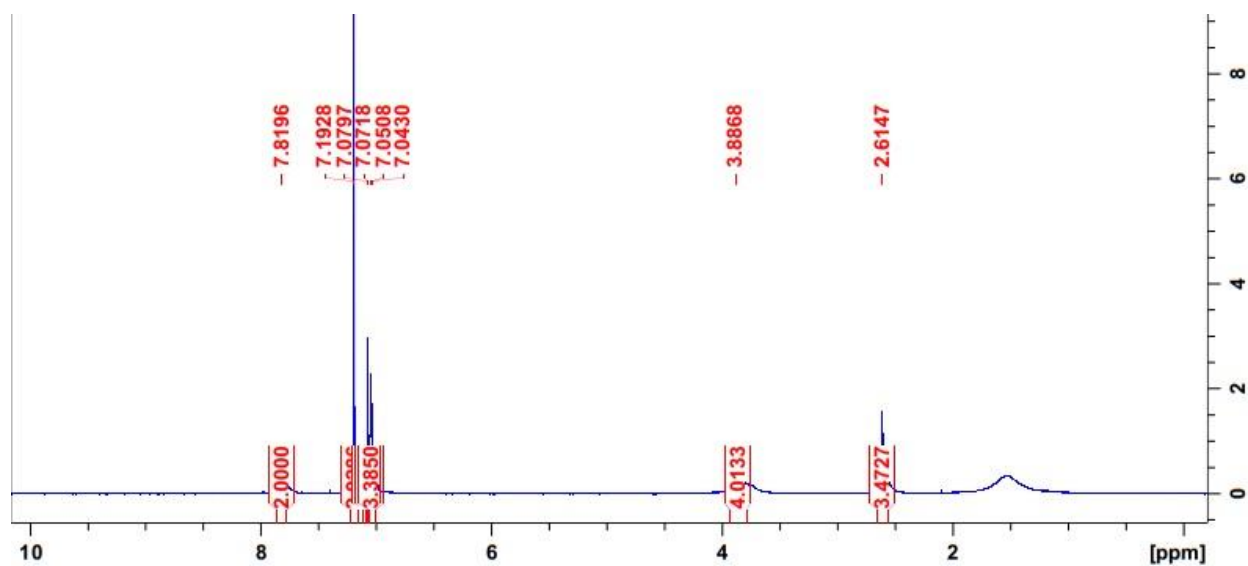

**SI-Figure 73:  $^1\text{H}$  NMR spectrum of 3,5-Bis ((E)-5-bromo-2-thiophene benzylidene)-N-methyl-4-piperidone.**

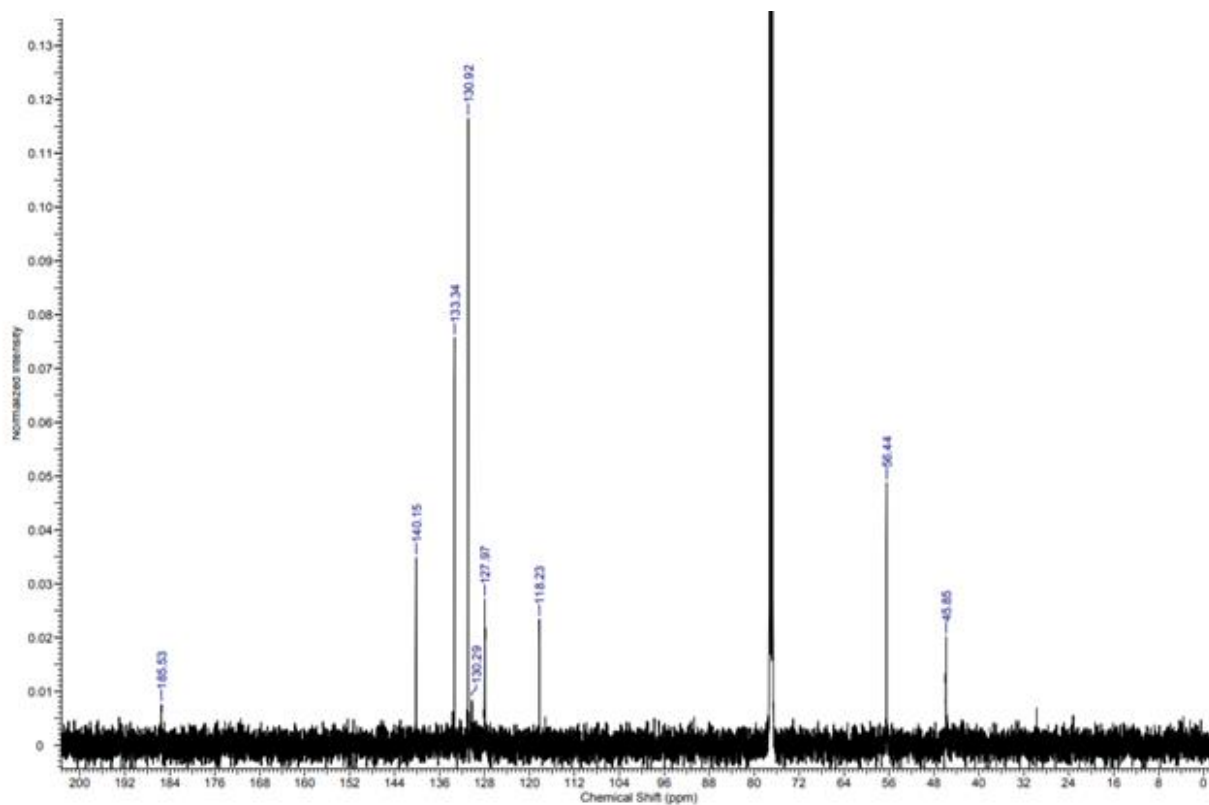

SI-Figure 74:  $^{13}\text{C}$  NMR spectrum of 3,5-Bis ((E)-5-bromo-2-thiophene benzylidene)-N-methyl-4-piperidone.

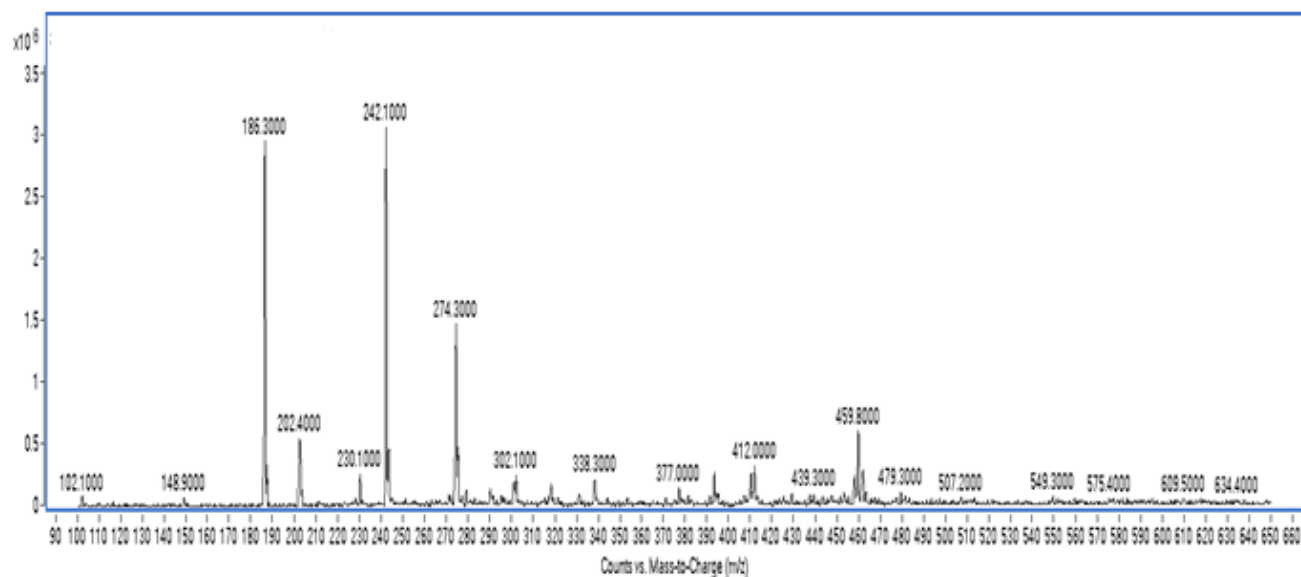

Mass:  $[\text{M}+\text{H}]^+ = m/z 459.8000$

SI-Figure 75: Mass spectrum of 3,5-Bis ((E)-5-bromo-2-thiophene benzylidene)-N-methyl-4-piperidone.

### Anti-plasmodial studies:

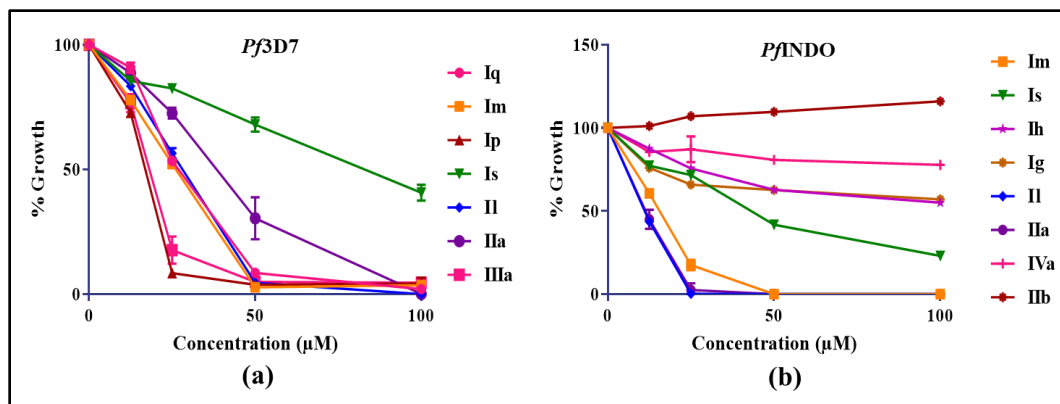

**SI-Figure 76: Anti-plasmodial screening of selected DANMPs at the concentrations between 100 and 10 µM: DANMPs showing >50% growth inhibition at 100 µM and <50% inhibition at 10 µM were selected for anti-plasmodial assay against rings of (a) *Pf3D7* and (b) *PfINDO*.**

**SI-Table 1: Comparison of melting points of DANMPs with literature values**

| Compound                  | Present study              |                    | Literature                |                          |
|---------------------------|----------------------------|--------------------|---------------------------|--------------------------|
|                           | Recrystallization solvent  | melting point (°C) | Recrystallization solvent | melting point (°C)       |
| Ia (R=H)                  | Petroleum ether-Chloroform | 111.5-113.0        | Ethanol                   | 118.0 <sup>1</sup>       |
| Ib (R=2-Cl)               | Chloroform-Methanol        | 145.0-147.8        | Hexane-Ethyl acetate      | 135.8-136.8 <sup>2</sup> |
| Ic (R=3-Cl)               | Chloroform-Methanol        | 172.2-173.6        | _#                        | _#                       |
| Id (R=4-Cl)               | Ethyl acetate              | 176.0-177.5        | Hexane- Ethyl acetate     | 180.0-182.0 <sup>3</sup> |
| Ie (R=3-Br)               | Petroleum ether-Acetone    | 123.0-125.0        | Ethyl acetate             | 121.0-124.0 <sup>4</sup> |
| If (R=4-Br)               | Chloroform- Ethyl acetate  | 183.7-186.3        | Ethanol                   | 180.0-182.0 <sup>5</sup> |
| Ig (R=4-OMe)              | Chloroform-Methanol        | 201.0-203.2        | Ethanol                   | 202.0-204.0 <sup>4</sup> |
| Ih (R=4-Me)               | Chloroform-Methanol        | 200.0-202.0        | Ethanol /H <sub>2</sub> O | 195.0-196.0 <sup>6</sup> |
| Ii (R=4-Isopropyl)        | Methanol                   | 105.5-108.5        | Ethanol                   | 98.0-100.0 <sup>7</sup>  |
| Ij (R=3-CF <sub>3</sub> ) | Petroleum ether-Chloroform | 143.0-145.2        | Ethanol                   | 142.0-143.0 <sup>7</sup> |

|                                 |                         |              |                       |                           |
|---------------------------------|-------------------------|--------------|-----------------------|---------------------------|
| Ik (R=3-NO <sub>2</sub> )       | Chloroform-Methanol     | 185.0-188.5  | Acetone               | 189.5-190.5 <sup>8</sup>  |
| Il (R=4-SCH <sub>3</sub> )      | Chloroform-Methanol     | 172.0-174.0  | Ethanol               | 122.0-123.0 <sup>7</sup>  |
| Im (R=2-Cl-5-CF <sub>3</sub> )* | Chloroform-Methanol     | 154.4-157.2  | –                     | –                         |
| In (R=2,5-di-OMe)               | Petroleum ether-Acetone | 135.0-137.0  | Ethanol               | 133.0-134.0 <sup>9</sup>  |
| Io (R=3,4-di-OMe)               | Chloroform-Methanol     | 167.2- 169.7 | Chloroform-Ethanol    | 157.3-159.4 <sup>2</sup>  |
| Ip (R=3,5-di-Cl)*               | Chloroform-Methanol     | 186.3-188.6  | –                     | –                         |
| Iq (R=4-NO <sub>2</sub> )       | Chloroform-Methanol     | 230.5-231.2  | Butanol               | 204.0-205.0 <sup>6</sup>  |
| Ir (R=3-OH)                     | Chloroform-Methanol     | 284.0-286.0  | Hexane- Ethyl acetate | 136.0-136.8 <sup>10</sup> |
| Is (R=4-OH)                     | Chloroform-Methanol     | 230.5-231.2  | Ethanol               | 197.0-199.0 <sup>11</sup> |
| It (R=4-OH-3,5-OMe)             | Methanol                | 237.2-238.4  | _#                    | _#                        |
| Iu (R=4-OH-3-OMe)               | Methanol                | 217.0-220.5  | Chloroform-Ethanol    | 195.0-197.0 <sup>11</sup> |
| Iia (2-thiophene)               | Chloroform-Methanol     | 115.0-118.0  | Ethanol               | 118.0 <sup>1</sup>        |
| Iib (2-pyrrol)                  | Chloroform-Methanol     | 214.0-215.4  | _#                    | _#                        |
| IIIa (3-thiophene)              | Methanol                | 125.8-127.8  | Ethanol and THF       | 102.0-104.0 <sup>12</sup> |
| IVa (2-thiophene-5-Br)          | Chloroform-Methanol     | 204.8-207.0  | Ethanol and THF       | 128.0-130.0 <sup>12</sup> |

\*Novel compounds; #Literature values are not known

For most compound, there are only some minor differences in melting points of our compounds when compared to the literature values because the solvent of recrystallization used by us is different from what has been used by previous investigators. Where there is considerable difference in melting points of our study and literature values, we have rechecked the melting points and obtained concurrent values. Therefore, our melting points are authentic. Besides both mass and NMR spectra are fully consistent with the structures given.

**SI-Table 2: RPHPLC Retention times of the DANMPs**

| <b>Molecule</b>                | <b>Retention time (minutes)</b> |
|--------------------------------|---------------------------------|
| Ia (R=H)                       | 15.72                           |
| Ib (R=2-Cl)                    | 18.01                           |
| Ic (R=3-Cl)                    | 18.83                           |
| Id (R=4-Cl)                    | 18.77                           |
| Ie (R=3-Br)                    | 19.43                           |
| If (R=4-Br)                    | 19.51                           |
| Ig (R=4-OMe)                   | 13.95                           |
| Ih (R=4-Me)                    | 17.55                           |
| Ii (R=4-Isopropyl)             | 18.60                           |
| Ij (R=3-CF <sub>3</sub> )      | 15.56                           |
| Ik (R=3-NO <sub>2</sub> )      | 14.80                           |
| Il (R=4-methyl thio )          | 11.94                           |
| Im (R=2-Cl-5-CF <sub>3</sub> ) | 19.68                           |
| In (R=2,5-di-OMe)              | 10.93                           |
| Io (R=3,4-di-OMe)              | 9.56                            |
| Ip (R=3,5-di-Cl)               | 18.00                           |
| Iq (R=4-NO <sub>2</sub> )      | 17.25                           |
| Ir (R=3-OH)                    | 10.56                           |
| Is (R=4-OH)                    | 8.85                            |
| It (R=4-OH-3,5-OMe)            | 9.33                            |
| Iu (R=4-OH-3-OMe)              | 9.47                            |
| IIa (2-thiophene)              | 10.22                           |
| IIb (2-pyrrol)                 | 8.53                            |
| IIIa (3-thiophene)             | 10.70                           |
| IVa (2-thiophene-5-Br)         | 13.59                           |

**SI-Table 3: Crystallographic data of 3,5-Bis ((E)-4-chlorobenzylidene)-N-methyl-4-piperidone**

| <b>Parameter</b>  | <b>3,5-Bis ((E)-4-Chlorobenzylidene)-N-methyl-4-piperidone</b> |
|-------------------|----------------------------------------------------------------|
| Empirical formula | C <sub>20</sub> H <sub>17</sub> Cl <sub>2</sub> NO             |
| CCDC number       | 1960029                                                        |
| Formula weight    | 358.24                                                         |
| Crystal system    | Monoclinic                                                     |
| Space group       | <i>P</i> 2 <sub>1</sub> / <i>c</i>                             |
| a (Å)             | 5.4902(4)                                                      |
| b (Å)             | 14.2399(8)                                                     |
| c (Å)             | 23.1491(14)                                                    |
| α (°)             | 90                                                             |
| β (°)             | 104.323(6)                                                     |

|                                                              |                         |
|--------------------------------------------------------------|-------------------------|
| $\gamma$ ( $^{\circ}$ )                                      | 90                      |
| V ( $\text{\AA}^3$ )                                         | 1753.5(2)               |
| Z                                                            | 4                       |
| $\rho_{\text{calc}}$ ( $\text{g}/\text{cm}^{-3}$ )           | 1.357                   |
| Temperature (K)                                              | 293.0(2)                |
| $\mu$ / $\text{mm}^{-1}$                                     | 0.376                   |
| $2\theta_{\text{min, max}}$ ( $^{\circ}$ )                   | 5.722, 65.59            |
| F (000)                                                      | 744.0                   |
| $h_{\text{min,max}}; k_{\text{min,max}}; l_{\text{min,max}}$ | -8, 7; -13, 21; -35, 21 |
| Total no. of reflections                                     | 11576                   |
| $R_{\text{int}}$                                             | 0.0241                  |
| No. of unique reflections                                    | 5387                    |
| $R_1 [I > 2\sigma(I)]$                                       | 0.0539                  |
| wR2 (all data)                                               | 0.1732                  |
| GooF on $F^2$                                                | 1.032                   |
| $\Delta\rho_{\text{max,min}}/\text{e}\text{\AA}^{-3}$        | 0.19/-0.36              |

### ***In silico* studies:**

Active site docking studies were done by selecting the pocket built up by amino acid residues D27, P52, K84, D105, S107, G156, G216, G217, F236, V237, G238, S239 in Pdx1 of the *Plasmodial* PLP synthase complex with bound phosphate ion (4ADS). All the compounds exhibited moderate to good energy scores within the range of -6.0 to -9.0 kcal mol<sup>-1</sup> which are all > -5.5 kcal mol<sup>-1</sup>, the value showed by R5P (SI-Table 4). This shows that all the DANMPs are binding strongly to the enzyme and may compete with R5P for binding to active site. The compounds **Ie** (IC<sub>50</sub>: 0.35  $\mu\text{M}$ ), **Ir** (IC<sub>50</sub>: 0.74  $\mu\text{M}$ ) and **If** (IC<sub>50</sub>: 1.36  $\mu\text{M}$ ) which showed the best *in vitro* anti-plasmodial activities among all DANMPs against *Pf*MRA-1240 and *Pf*INDO also showed promising *in silico* energy scores of -7.0 and -8.1 kcal mol<sup>-1</sup>. Interestingly, the less potent derivatives (**Ig**, **Ih**, **Iib**, **IIIa** and **IVa**, IC<sub>50</sub> *Pf*3D7 16.5 to >100  $\mu\text{M}$ ) showed poorer docking energy scores (-6.0 to -6.9 kcal mol<sup>-1</sup>) as compared to more potent derivatives **Ie**, **If**, **In** and **Ir** (IC<sub>50</sub> *Pf*3D7 1.39 to 3.39  $\mu\text{M}$ ) with high docking scores (-7.0 to -7.3 kcal mol<sup>-1</sup>).

**SI-Table 4: Energy scores of the DANMPs with *Pf*PLP synthase with bound phosphate ion intermediate (4ADS).**

| Code | Energy Score (kcal mol <sup>-1</sup> ) | Code | Energy Score (kcal mol <sup>-1</sup> ) |
|------|----------------------------------------|------|----------------------------------------|
| Ia   | -7.5                                   | In   | -7.3                                   |
| Ib   | -7.9                                   | Io   | -7.0                                   |
| Ic   | -7.9                                   | Ip   | -6.9                                   |
| Id   | -6.4                                   | Iq   | -6.9                                   |
| Ie   | -7.0                                   | Ir   | -8.1                                   |
| If   | -7.0                                   | Is   | -7.4                                   |
| Ig   | -6.4                                   | It   | -6.3                                   |
| Ih   | -6.4                                   | Iu   | -6.9                                   |
| Ii   | -7.3                                   | IIa  | -9.0                                   |
| Ij   | -8.0                                   | IIb  | -6.9                                   |
| Ik   | -7.9                                   | IIIa | -6.3                                   |
| II   | -6.1                                   | Iva  | -6.0                                   |
| Im   | -8.5                                   |      |                                        |

Docking studies were also performed for these ligands on other Plasmodial proteins (Plasmepsin IV from *P. falciparum* (1LS5), Phosphatidylinositol 4-kinase III beta-PIK93 (4D0L), *P. falciparum* dihydroorotate dehydrogenase (6VTN)) and non-plasmodial proteins (COX-1 (3N8Y), COX-2 (3LN1), 5-LOX (3O8Y), Hen egg-white lysozyme (3WUN), and Human Hexokinase 2 (5HG1)). Molecular docking results (SI-Table 5) revealed that plasmepsin IV from *P. falciparum* could also be a good target for DANMP. However, the non-plasmodial proteins like 3O8Y displayed poor docking scores e.g -1.9 kcal mol<sup>-1</sup> with **Ie** suggesting that docking with *plasmodial* proteins is not non-specific.

**SI-Table 5: Docking scores of Potent DANMPs against *plasmodial* and non-*plasmodial* proteins**

| Compound  | Plasmodial targets |      |      |       | Non-plasmodial targets |      |      |      |      |
|-----------|--------------------|------|------|-------|------------------------|------|------|------|------|
|           | 4ADS               | 1LS5 | 4D0L | 6VTN  | 3N8Y                   | 3LN1 | 3O8Y | 3WUN | 5HG1 |
| <b>Ie</b> | -7.0               | -8.6 | -8.0 | -9.6  | -8.7                   | -6.5 | -1.9 | -7.3 | -9.1 |
| <b>If</b> | -7.0               | -7.7 | -8.4 | -8.4  | -8.7                   | -6.1 | -3.8 | -7.6 | -8.1 |
| <b>Ic</b> | -7.9               | -8.6 | -8.0 | -9.3  | -9.0                   | -6.7 | -6.6 | -7.3 | -8.7 |
| <b>In</b> | -7.3               | -7.4 | -7.8 | -4.0  | -8.8                   | -6.5 | -4.8 | -7.2 | -8.1 |
| <b>Ir</b> | -8.1               | -8.3 | -8.3 | -9.7  | -8.5                   | -7.0 | -8.1 | -7.1 | -8.7 |
| <b>It</b> | -6.3               | -7.0 | -7.0 | -6.7  | -8.1                   | -6.9 | -1.3 | -6.6 | -8.0 |
| <b>Ij</b> | -8.0               | -8.6 | -9.2 | -10.5 | -10.2                  | -7.3 | -6.3 | -8.6 | -9.9 |
| <b>Ia</b> | -7.5               | -8.7 | -7.7 | -8.8  | -8.0                   | -6.3 | -8.2 | -6.7 | -8.8 |



**Protein-ligand interaction:**

In a bid to find if with structural changes and the gain or loss of activity in test molecules, the interacting residues in PLP Synthase might be different; *in silico* identification of the interacting amino acid residues at the active site of the protein with most potent compounds among *para* and *meta* substituted DANMPs (SI-Table 6 and SI-Figure 77) was done using PyMol and BIOVIA Discovery Studio.

**SI-Table 6: Anti-plasmodial potency, *Pf* Pyridoxal synthase (4ADS) *in silico* docking scores and amino acid residues interacting with the ligands**

| Interacting amino acid residues      | If<br>(-7.0)# | Id<br>(-6.4) | Ii<br>(-7.3) | Ie<br>(-7.0) | Ir<br>(-8.1) | Ic<br>(-7.9) |
|--------------------------------------|---------------|--------------|--------------|--------------|--------------|--------------|
| IC <sub>50</sub> (μM) <i>Pf</i> INDO | 1.36          | 5.64         | 3.93         | 1.92         | 2.45         | 2.17         |
| IC <sub>50</sub> (μM) <i>Pf</i> 3D7  | 3.39          | 3.32         | 3.68         | 1.39         | 1.44         | 1.95         |
| IC <sub>50</sub> (μM) <i>Pf</i> MRA  | 1.07          | >100         | 3.19         | 0.35         | 0.74         | 0.74         |
| D27*                                 | +             | +            |              |              | +            | +            |
| K29                                  | +             | +            |              |              | +            |              |
| L48                                  | +             | +            |              |              | +            | +            |
| E49                                  |               |              |              | +            | +            | +            |
| I51                                  |               | +            | +            | +            | +            | +            |
| L55                                  |               |              | +            | +            | +            | +            |
| R56                                  | +             | +            | +            | +            | +            | +            |
| T58                                  |               |              | +            |              |              |              |
| D59                                  |               | +            | +            |              |              |              |
| G60                                  |               | +            | +            | +            | +            | +            |
| V61                                  |               |              |              | +            | +            | +            |
| A62                                  |               | +            | +            | +            | +            | +            |
| R63                                  |               |              |              |              | +            |              |
| K84*                                 |               | +            |              |              | +            | +            |
| E108                                 |               |              |              | +            |              |              |
| V109                                 | +             | +            |              | +            | +            | +            |
| K152                                 |               |              | +            |              |              |              |
| G153                                 |               |              | +            |              |              |              |
| E154                                 |               |              | +            |              |              |              |
| A155                                 | +             |              |              | +            | +            | +            |
| G156*                                | +             | +            |              |              |              |              |
| G238*                                | +             | +            |              |              | +            | +            |
| S239*                                | +             | +            |              |              | +            | +            |

|      |   |   |   |   |   |   |
|------|---|---|---|---|---|---|
| F242 | + | + |   |   |   |   |
| E243 | + | + |   |   |   |   |
| H279 |   |   | + | + | + | + |
| T282 | + | + |   |   |   |   |

\*Catalytic residues from Ribose-5-phosphate substrate; Empty spaces represent the absence of the interaction, # values in parentheses represent docking scores with *Pf*PLP Synthase.

With the *meta* substituted derivatives, Ile 51, Ala 62, Ala 155, Val 109, GLU 49 and van der Waals forces of interactions in the active site are mainly responsible for their activity. The *meta* substituted compounds such as **Ie**, **Ir** and **Ic** formed pi-sigma interaction with Ile-51. Val 109 and Ala 155 showed pi-alkyl interactions with the arene rings of **Ie** while bromo groups in **Ie** exhibited interactions with the alkyl groups of Ala 62 and Val 106. These three interactions might be responsible for superior activity of **Ie**. Both pi-alkyl interactions with the arene rings as well as alkyl groups of the residues were not seen with **Ir**. However, **Ir** showed one hydrogen bond with Glu 49 and more van der Waals interactions as compared to **Ie** and **Ic**. These two interactions with **Ir** may be contributing towards its potential activity. The pi-alkyl interactions with the arene rings are missing in case of **Ic** but chloro groups in **Ic** interacted with the alkyl side chains of Ala 62, Val 109 and Ala 155. The compound **Ij** showed pi-alkyl interaction with a few of the above-mentioned residues e.g. Ala 62 and Ile 51. In contrast, **Ik**, which showed poor to moderate antiparasitic activity, did not participate in any interactions with these key amino acids. This may explain the poor activity of **Ik**.

In case of the *para* substituted derivatives, Arg 56, Gly 156, Ala 62, Val 109, Ala 155 and van der Waals forces of interactions seemed to play a crucial role in their activity. The most active compound **If** among the *para* substituted derivatives displayed two hydrogen bonds between Arg 56 and Gly 156 and the carbonyl group of the molecule. The presence of pi-alkyl interaction with Ala 62, Val 109 and Ala 155, and many van der Waals interactions in case of **Ii** contributed to its potency. In contrast, **Id** showed one hydrogen bonding interaction with Arg 56 apart from some van der Waals interactions. Moderately active compound **Ii** exhibited pi-alkyl interaction with Ala 62, Val 109 and Ala 155, and many van der Waals interactions. Less number of pi-alkyl interactions and van der Waals interactions with compounds **Is** and **Ig** may have resulted in the reduction of their potency.

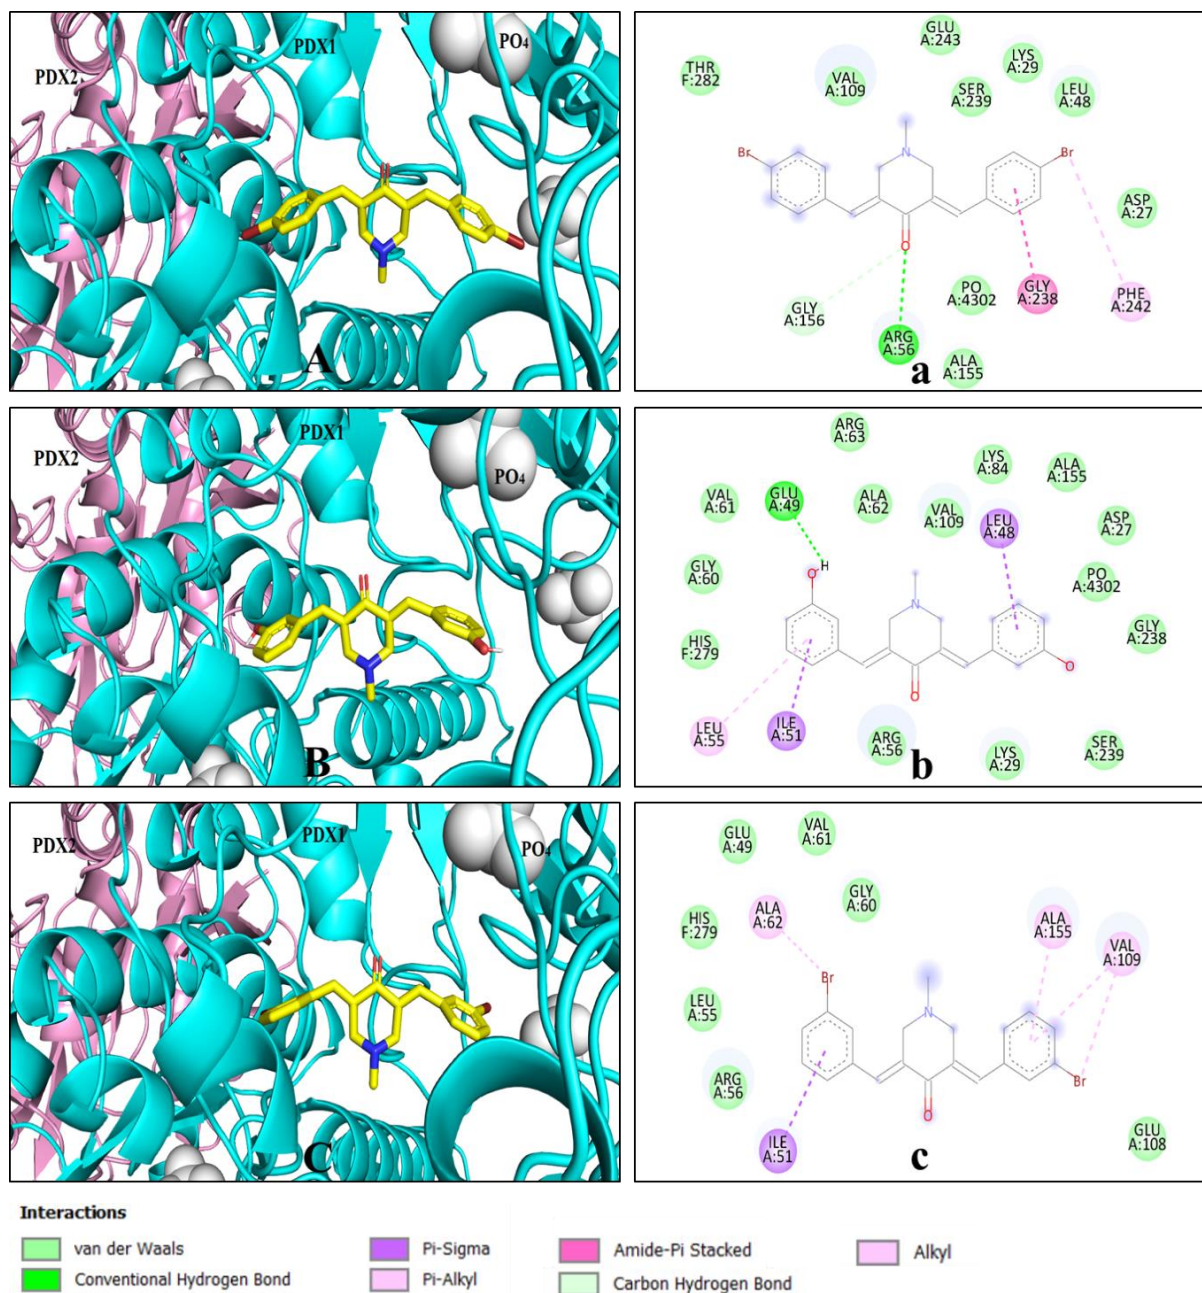

**SI-Figure 77:** The best docked poses of If (A), Ir (B), Ie (C) with *Pf*PLP synthase (PDB: 4ADS) and the 2-D representation of interacting amino acid residues a-c. Ligands are shown in stick format (yellow: carbon, red: oxygen and blue: Nitrogen).

### Tanimoto Similarity Index (TSI):

A plot of the *in-silico* active site docking scores against IC<sub>50</sub> (*Pf*INDO) for the derivatives with IC<sub>50</sub> < 30 μM is shown in SI-Figure 78. The correspondence between good docking scores against PLP synthase and good *in vitro* anti-plasmodial activity against malaria parasite seems to suggest that this crucial enzyme may be one of the important targets the DANMPs action studied by us. Four inverse correlation patterns were found where an increase in docking energy (negative scale) was correlated with a decrease in IC<sub>50</sub> values. In other words, compounds with high anti-plasmodial potency were found to be binding to PLP synthase with high docking scores. In addition, compounds within each group were compared with each other for their structural and functional similarities based on Tanimoto Similarity Index (TSI) calculated using Fingerprint Similarity tool (SI-Table 7) and ADME properties (SI-Table 8).

Since TSI of > 0.5 indicates significant similarities among compounds within each group, the observed TSI values of ≥ 0.6 except **IIIa** (TSI: 0.359) and **IIa** (TSI: 0.433) (SI-Figure 78) indicate good structural and functional similarity among the molecules in each of the four groups (SI-Table 7). The high TSI values for **It**, **Id** and **II** in group 1 compounds may be related to the presence of +R substitution at 4<sup>th</sup> position in all these compounds. **IIIa** of this group showed a low TSI perhaps because in contrast to all other members, which are benzene derivatives, **IIIa** happens to be a thienyl derivative. The common feature conferring high TSI to Group 2 compounds may be the fact that **Iu**, **Io** and **In** contain two oxygen bearing substituents in the aryl rings while **If**, **Ie** and **Ip** have halogens in the aryl rings. Incidentally, with the lone exception of **Ia** with a molar refractivity of 95, the molar refractivity for all members of this group also lay in the range 110-121. In contrast to Group 1 compounds characterized by a +R substitution, the unique feature of Group 3 compounds was -I substituents at the *meta* position on the aryl rings. The molar refractivity of Group 3 compounds lay in the range of 99-112. However, when different physicochemical and biological properties of compounds were compared within each group, Group 2 compounds (**Ia**, **Ie**, **If**, **Ii**, **In**, **Io**, **Ip** and **Iu**) showed maximum similarities such as the number of rotatable bonds, H-bond acceptors, GI absorption and BBB permeability (SI-Table 8). **Ir** with TSI of ~0.7 for Group 3 compounds, showed high GI absorption and BBB permeability similar to **Ie** and **If**. The above-mentioned similarities among potent compounds **Ie**, **If** and **Ir** were well supported by TSI values which were 0.69 (**Ie**), 0.71 (**If**) and 1.0 (**Ir**) (SI-Table 7).

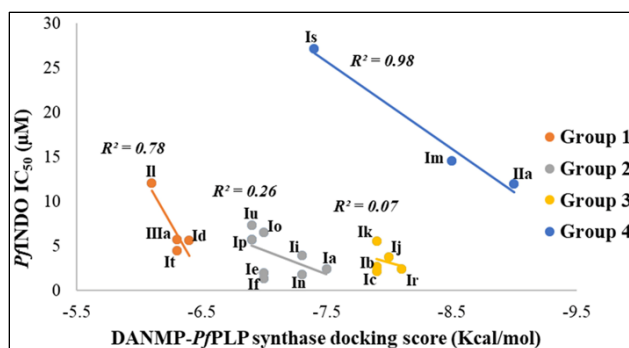

**SI-Figure 78:** *In vitro* PfINDO IC<sub>50</sub> values vs *in silico* PfPLP Synthase docking scores of DANMPs.

**SI-Table 7:** Tanimoto Similarity Index of DANMPs within each correlating group.

| Compounds      | TSI   | Compounds      | TSI   |
|----------------|-------|----------------|-------|
| <b>Group 1</b> |       | <b>Group 3</b> |       |
| <b>It</b>      | 1.000 | <b>Ir</b>      | 1.000 |
| <b>Id</b>      | 0.692 | <b>Ik</b>      | 0.821 |
| <b>Il</b>      | 0.654 | <b>Ic</b>      | 0.807 |
| <b>IIIa</b>    | 0.359 | <b>Ib</b>      | 0.760 |
|                |       | <b>Ij</b>      | 0.736 |
| <b>Group 2</b> |       | <b>Group 4</b> |       |
| <b>Iu</b>      | 1.000 | <b>Is</b>      | 1.000 |
| <b>Io</b>      | 0.974 | <b>Im</b>      | 0.672 |
| <b>In</b>      | 0.829 | <b>IIa</b>     | 0.433 |
| <b>Ia</b>      | 0.770 |                |       |
| <b>Ii</b>      | 0.713 |                |       |
| <b>If</b>      | 0.713 |                |       |
| <b>Ie</b>      | 0.688 |                |       |
| <b>Ip</b>      | 0.680 |                |       |

In nutshell, this correlation of high potency with high PLP synthase docking scores and similarities of ADME properties (SI-Table 8) among potent compounds further supports the hypothesis that one of the modes of action of DANMPs could be via targeting the PLP synthase of *P. falciparum*.

**SI-Table 8: Different Lipinski parameters and ADME properties of 4 groups of compounds (selected from Figure 7):** iLogP: Log  $P_{o/w}$ ; GI absorption: Gastro-intestinal absorption; BBB permeant: Blood Brain Barrier permeant.

|        | DAN MP | Properties |                    |               |                        |                  |               |       |       |        |               |              |
|--------|--------|------------|--------------------|---------------|------------------------|------------------|---------------|-------|-------|--------|---------------|--------------|
|        |        | MW (g/mol) | Molar refractivity | Fraction Csp3 | No. of rotatable bonds | H-bond acceptors | H-bond donors | iLogp | LogS  | Log Kp | GI Absorption | BBB permeant |
| Line 1 | II     | 381.55     | 118.52             | 0.23          | 4                      | 2                | 0             | 4.05  | -5.22 | -5.32  | High          | Yes          |
|        | IIIa   | 301.43     | 90.83              | 0.19          | 2                      | 2                | 0             | 3.26  | -3.84 | -6.01  | High          | Yes          |
|        | Id     | 358.26     | 105.1              | 0.15          | 2                      | 2                | 0             | 3.83  | -5.38 | -5.01  | High          | Yes          |
|        | It     | 441.47     | 125.09             | 0.29          | 6                      | 8                | 2             | 3.81  | -4.23 | -7.0   | High          | No           |
| Line 2 | If     | 447.16     | 110.48             | 0.15          | 2                      | 2                | 0             | 4.06  | -6.01 | -5.46  | High          | Yes          |
|        | Ie     | 447.16     | 110.48             | 0.15          | 2                      | 2                | 0             | 4.02  | -6.01 | -5.46  | High          | Yes          |
|        | Ip     | 427.15     | 115.12             | 0.15          | 2                      | 2                | 0             | 4.3   | -6.57 | -4.54  | High          | Yes          |
|        | Iu     | 381.42     | 112.11             | 0.23          | 4                      | 6                | 2             | 3.55  | -4.07 | -6.59  | High          | No           |
|        | Io     | 409.47     | 121.04             | 0.29          | 6                      | 6                | 0             | 4.16  | -4.5  | -6.3   | High          | Yes          |
|        | In     | 409.47     | 121.04             | 0.29          | 6                      | 6                | 0             | 4.3   | -4.5  | -6.3   | High          | Yes          |
|        | Ii     | 373.53     | 124.24             | 0.35          | 4                      | 2                | 0             | 4.69  | -5.92 | -4.4   | High          | Yes          |
|        | Ia     | 289.37     | 95.08              | 0.15          | 2                      | 2                | 0             | 3.44  | -4.19 | -5.49  | High          | Yes          |
| Line 3 | Ic     | 358.26     | 105.1              | 0.15          | 2                      | 2                | 0             | 3.77  | -5.38 | -5.01  | High          | Yes          |
|        | Ik     | 379.37     | 112.72             | 0.15          | 4                      | 6                | 0             | 2.56  | -4.32 | -6.28  | High          | No           |
|        | Ib     | 358.26     | 105.1              | 0.15          | 2                      | 2                | 0             | 3.69  | -5.38 | -5.01  | High          | Yes          |
|        | Ij     | 425.37     | 105.08             | 0.23          | 4                      | 8                | 0             | 3.77  | -5.91 | -5.06  | Low           | No           |
|        | Ir     | 321.37     | 99.12              | 0.15          | 2                      | 4                | 2             | 2.53  | -3.91 | -6.19  | High          | Yes          |
| Line 4 | Is     | 321.37     | 99.12              | 0.15          | 2                      | 4                | 2             | 2.53  | -3.91 | -6.19  | High          | Yes          |
|        | Im     | 494.26     | 115.1              | 0.23          | 4                      | 8                | 0             | 4.11  | -7.11 | -4.59  | Low           | No           |
|        | Ila    | 301.43     | 90.83              | 0.19          | 2                      | 2                | 0             | 3.18  | -3.88 | -5.96  | High          | Yes          |

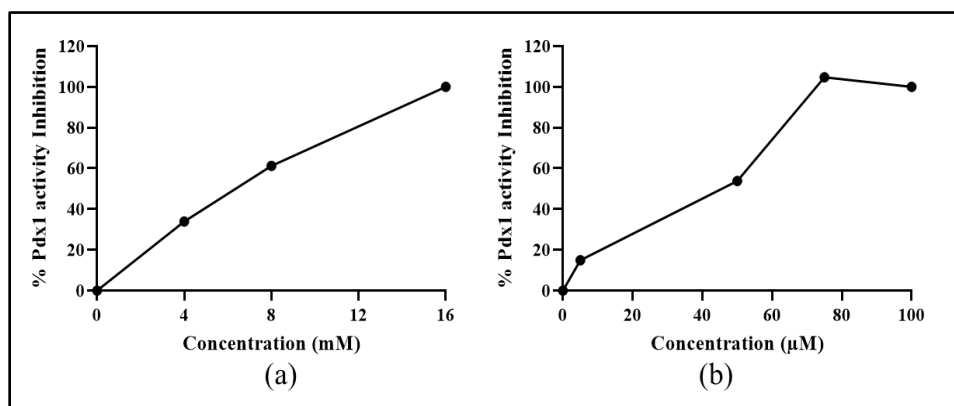

**SI-Figure 79: IC<sub>50</sub> curves of control E4P (a) and compound Ir (b) against Pdx1 enzyme activity inhibition.** The IC<sub>50</sub>s were calculated considering 100 % inhibition at the compound's maximum concentrations (16 mM for E4P and 100 µM for Ir).

## References:

- 1 S. Z. Vatsadze, M. A. Manaenkova, N. V. Sviridenkova, N. V. Zyk, D. P. Krut'ko, A. V. Churakov, M. Y. Antipin, J. A. K. Howard and H. Lang, *Russ. Chem. Bull.*, 2006, **55**, 1184–1194.
- 2 J. Wu, Y. Zhang, Y. Cai, J. Wang, B. Weng, Q. Tang, X. Chen, Z. Pan, G. Liang and S. Yang, *Bioorganic Med. Chem.*, 2013, **21**, 3058–3065.
- 3 Y. Eryanti, R. Hendra, T. Herlina, A. Zamri and U. Supratman, *Indones. J. Chem.*, 2018, **18**, 362–366.
- 4 J. feng Sun, G. ge Hou, F. Zhao, W. Cong, H. juan Li, W. shuai Liu and C. Wang, *Chem. Biol. Drug Des.*, 2016, 534–541.
- 5 G. G. Lyle, J. J. Dziark, J. Connor and C. S. Huber, *Tetrahedron*, 1973, **29**, 4039–4044.
- 6 H. I. El-Subbagh, S. M. Abu-Zaid, M. A. Mahran, F. A. Badria and A. M. Al-Obaid, *J. Med. Chem.*, 2000, **43**, 2915–2921.
- 7 L. M. Deck, L. A. Hunsaker, T. A. Vander Jagt, L. J. Whalen, R. E. Royer and D. L. Vander Jagt, *Eur. J. Med. Chem.*, 2018, **143**, 854–865.
- 8 J. Leonard, M. Locke and J. Leonard, 1955, vol. 77, pp. 1852–1855.
- 9 B. Yadav, S. Taurin, R. J. Rosengren, M. Schumacher, M. Diederich, T. J. Somers-Edgar and L. Larsen, *Bioorganic Med. Chem.*, 2010, **18**, 6701–6707.
- 10 Y. Eryanti, A. Zamri, T. Herlina, U. Supratman, M. M. Rosli and H. K. Fun, *Acta Crystallogr. Sect. E Crystallogr. Commun.*, 2015, **71**, 1488–1492.
- 11 K. M. Youssef, M. A. El-Sherbeny, F. S. El-Shafie, H. A. Farag, O. A. Al-Deeb and S. A. A. Awadalla, *Arch. Pharm. (Weinheim)*, 2004, **337**, 42–54.
- 12 J. Dennis Bilavendran, A. Manikandan, P. Thangarasu and K. Sivakumar, *Bioorg. Chem.*, 2020, **94**, 103484.
